# Supplementary material
Source: PubMed Central journal article supplement (PMC7262028)

# Chemistry–A European Journal

Supporting Information

## Direct High-Throughput Screening Assay for mRNA Cap Guanine-N7 Methyltransferase Activity

Renata Kasprzyk,<sup>[a, b]</sup> Mateusz Fido,<sup>[c]</sup> Adam Mamot,<sup>[c]</sup> Przemysław Wanat,<sup>[c]</sup>  
Mirosław Smietanski,<sup>[a]</sup> Michał Kopciał,<sup>[a, b]</sup> Victoria H. Cowling,<sup>[d]</sup> Joanna Kowalska,<sup>\*[c]</sup> and  
Jacek Jemielity<sup>\*[a]</sup>

SUPPORTING INFORMATION

---

**Table of Contents**

|                                                    |    |
|----------------------------------------------------|----|
| Results.....                                       | 3  |
| Supplementary Figures.....                         | 3  |
| Supplementary Tables.....                          | 10 |
| Experimental procedures.....                       | 13 |
| General Information.....                           | 13 |
| Chemical Synthesis.....                            | 14 |
| Ecm1 and RNMT-RAM Expression and Purification..... | 19 |
| UV-Vis and Fluorescence Measurements.....          | 20 |
| Monitoring of N7-MTase Activity.....               | 20 |
| z-Factor Determination.....                        | 21 |
| Author Contributions.....                          | 22 |
| Supporting References.....                         | 22 |
| HPLC profiles, HR MS and NMR Spectra.....          | 23 |

## SUPPORTING INFORMATION

## Results and Discussion

## Supplementary Figures

Figure S1. Comparison of A) GTP and B) GpppA Ecm1-catalyzed N7-methylation reaction progress monitored by RP HPLC

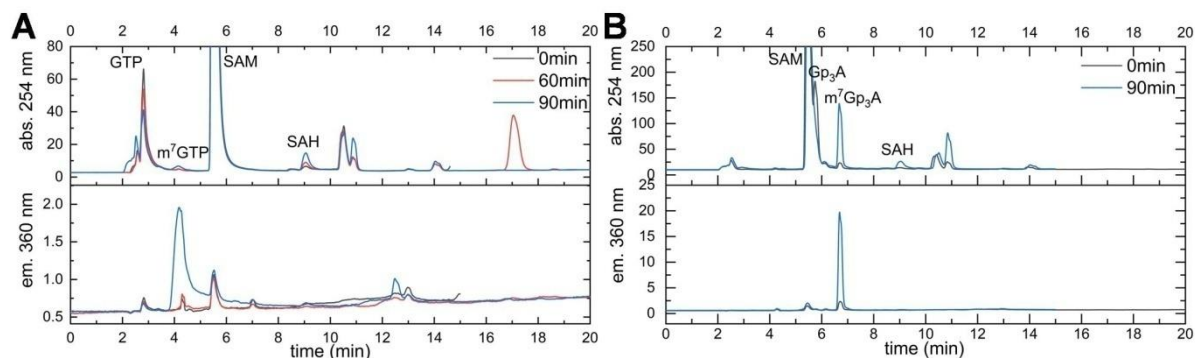

Reaction conditions: 10  $\mu\text{M}$  of GTP or GpppA, 1.2  $\mu\text{M}$  of Ecm1, 100  $\mu\text{M}$  of SAM, 5 mM DTT in 50 mM Tris-HCl pH 7.5 buffer. The reactions were incubated at 37  $^{\circ}\text{C}$  and stopped by incubation at 98  $^{\circ}\text{C}$  for 2 min.

RP HPLC analysis conditions: Elution with linear gradient of methanol (0-25% within 15 min) in 0.05 M ammonium acetate buffer pH 5.9.

Figure S2. Synthesis of alkyne-modified non-fluorescent precursors

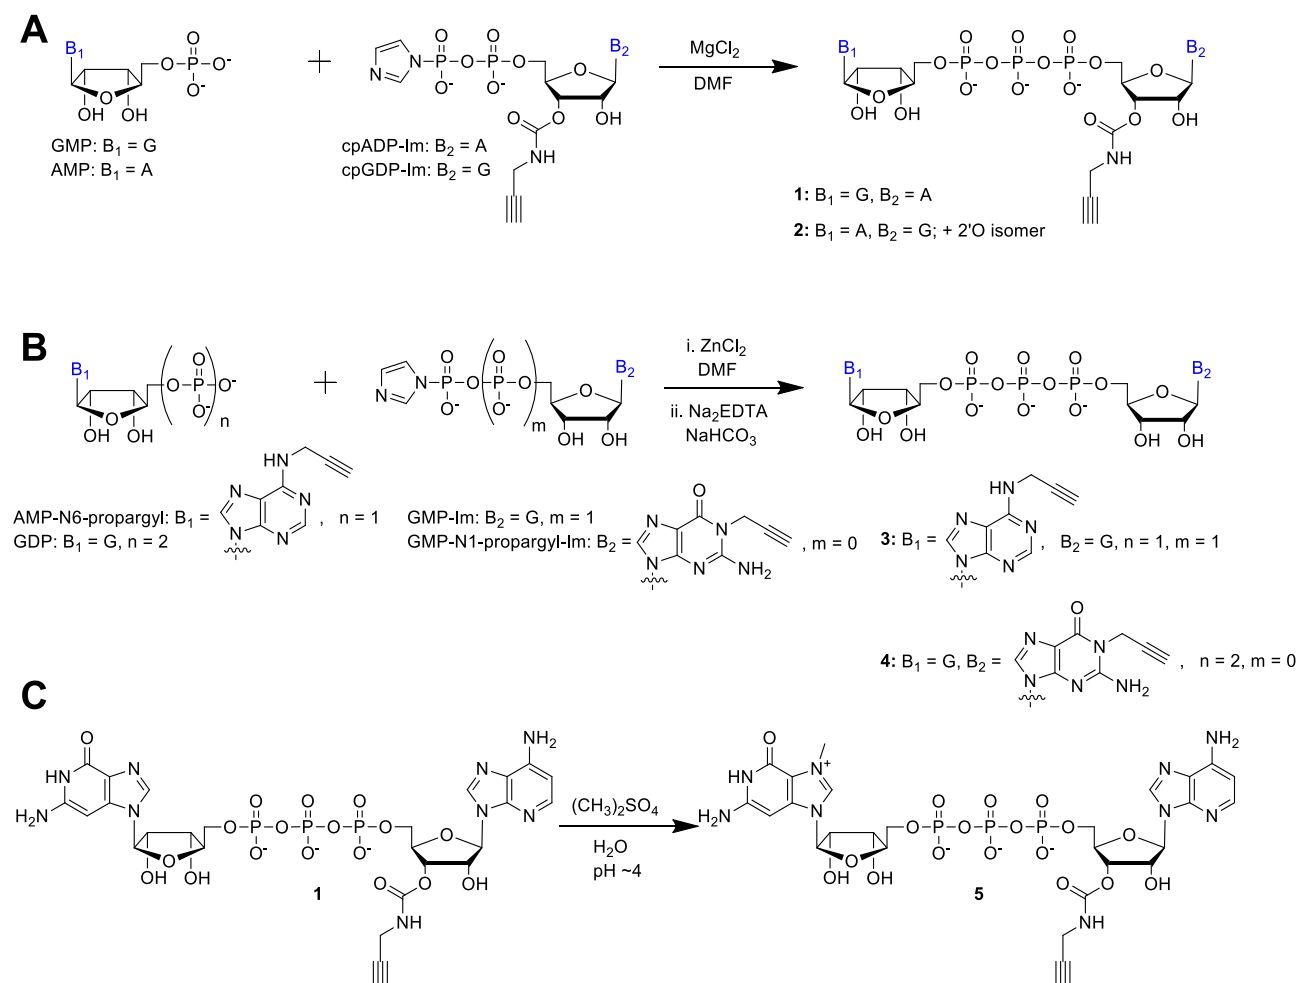

## SUPPORTING INFORMATION

**Figure S3.** Absorption and emission spectra of GpppA analogs labelled with different fluorescent tags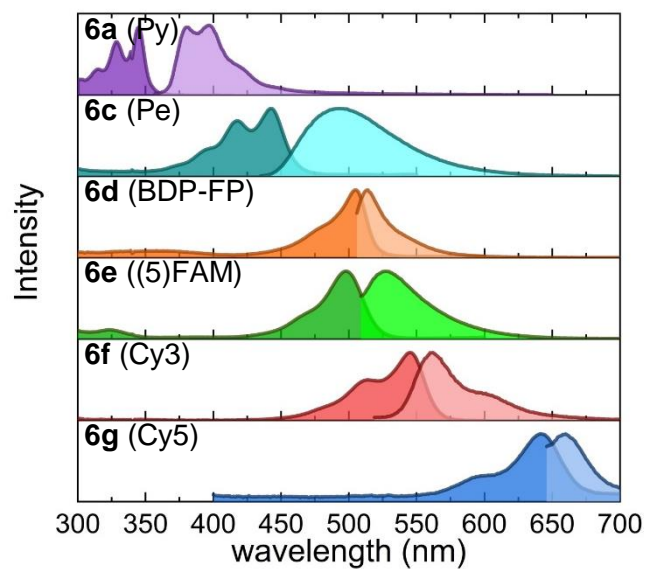

Conditions for emission spectra: 1  $\mu\text{M}$  probe in 50 mM Tris-HCl (pH 7.5) at 30  $^{\circ}\text{C}$ ; excitation at the absorption maximum.

## SUPPORTING INFORMATION

Figure S4. Comparison of Ecm1-catalyzed N7-methylation of probes **6a-b**, **8** and **9** using RP HPLC and MS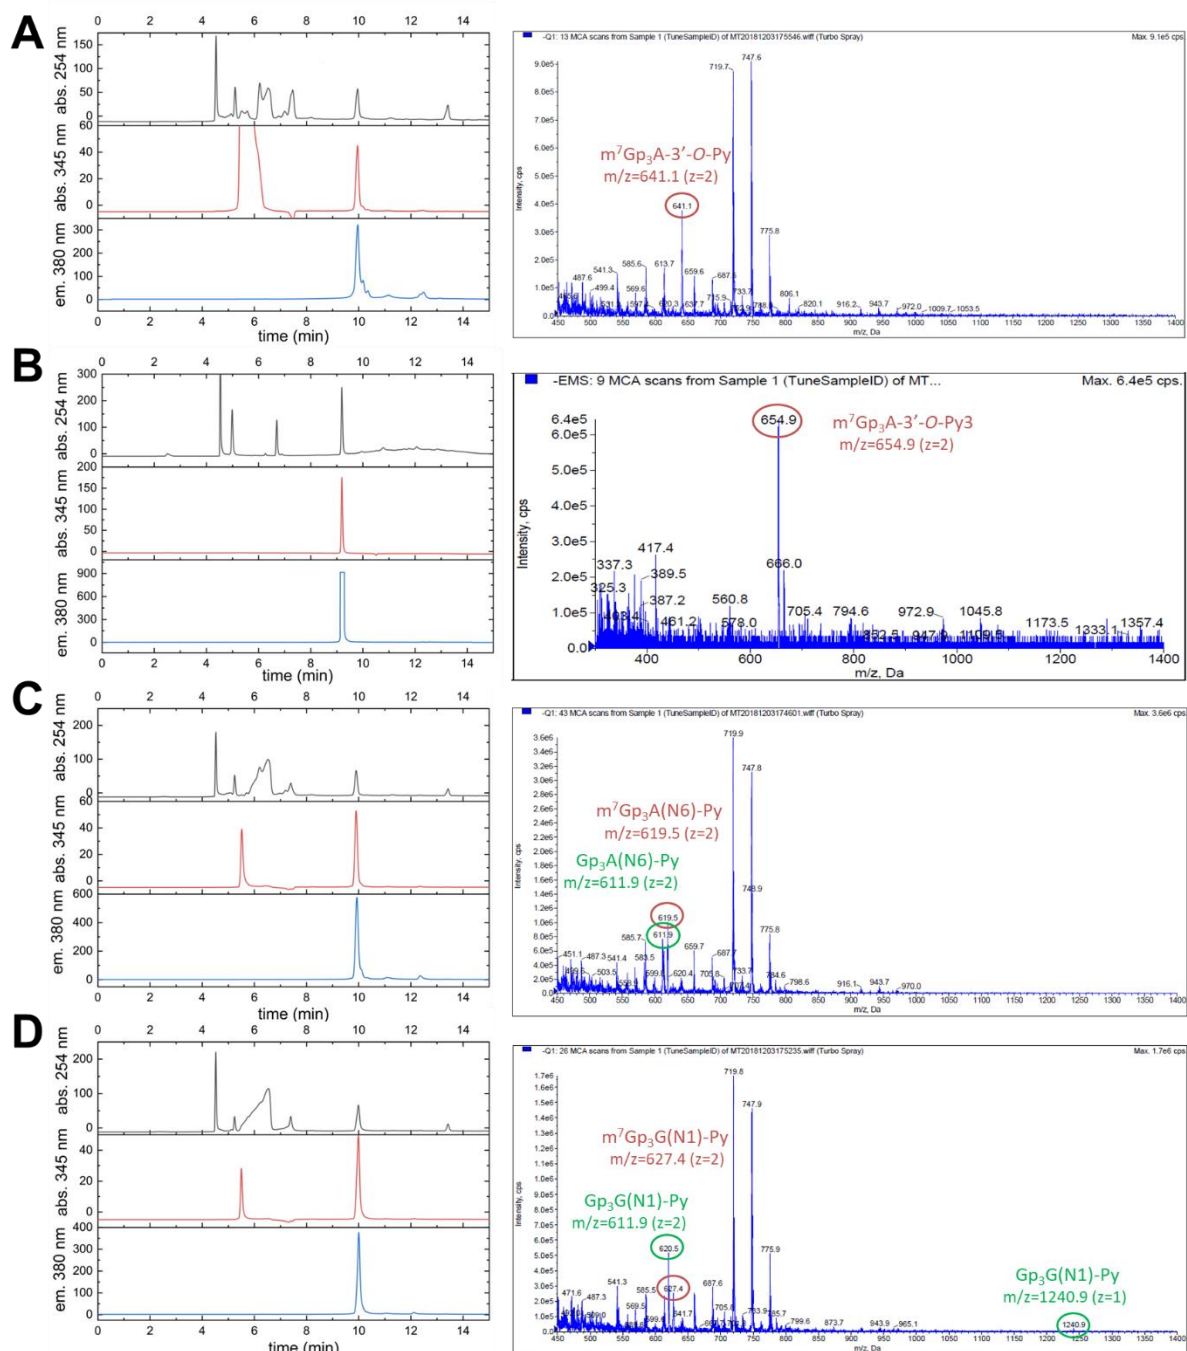

Reaction conditions: 100  $\mu$ M of A) **6a**, B) **6b**, C) **8** or D) **9**, 1  $\mu$ M of Ecm1, 500  $\mu$ M of SAM, 5 mM DTT in 50 mM Tris-HCl pH 7.5 buffer. The reactions were incubated at 37  $^{\circ}$ C for 3 h and stopped by 2 min incubation at 98  $^{\circ}$ C.

RP HPLC analysis conditions: Elution with linear gradient of acetonitrile (100% at 15 min) in 0.05 M ammonium acetate buffer pH 5.9.

MS spectra show analysis of RP HPLC signal with  $t_R$  A), C) and D) 10 min or B) 9.2 min.

## SUPPORTING INFORMATION

**Figure S5.** Determination of the z factor for the A) Ecm1 and B) RNMT-RAM kinetic assays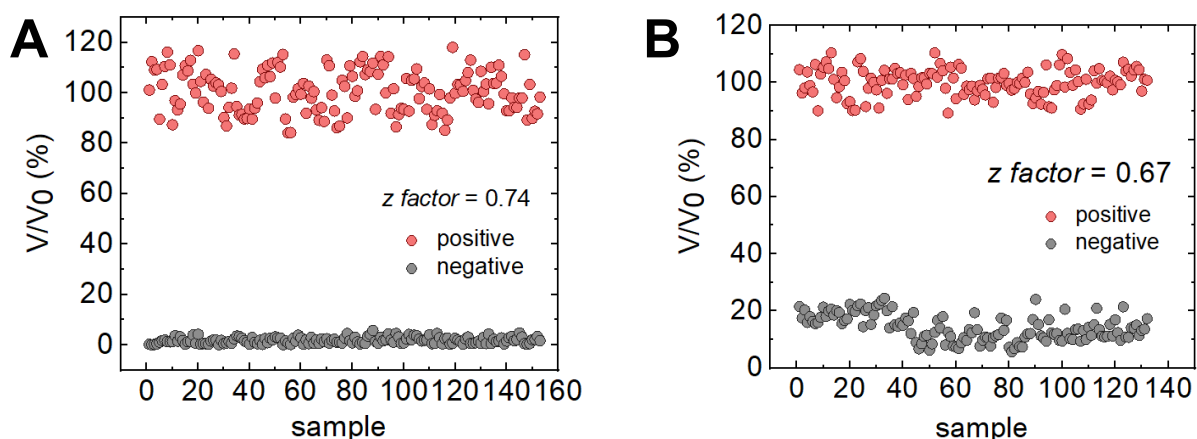

Reaction conditions for Ecm1: 2  $\mu$ M of probe **6b**, 10 nM of Ecm1, 50  $\mu$ M of SAM without (positive control) or with 25  $\mu$ M of sinefungin (negative control). The experiment was carried out on plate reader in 50 mM Tris-HCl pH 7.5 buffer at 30  $^{\circ}$ C.

Reaction conditions for RNMT-RAM: 2  $\mu$ M of probe **6b**, 20 nM of RNMT-RAM, 20  $\mu$ M of SAM without (positive control) or with 30  $\mu$ M of sinefungin (negative control). The experiment was carried out on plate reader in 50 mM Tris-HCl pH 7.5 buffer at 30  $^{\circ}$ C.

**Figure S6.** Synthesis of potential nucleotide-derived inhibitors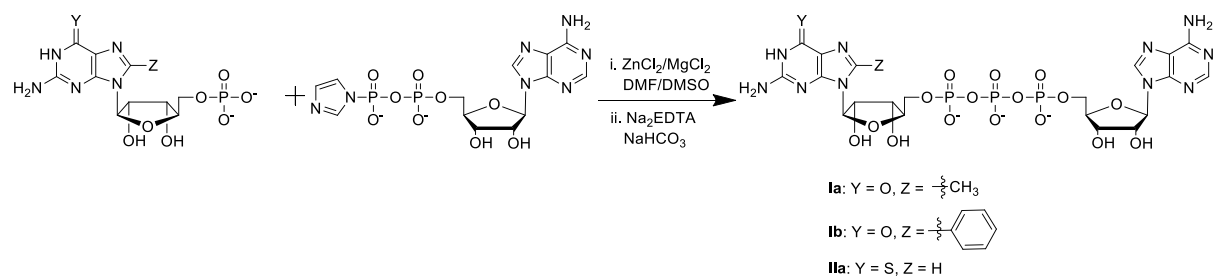

## SUPPORTING INFORMATION

Figure S7. Inhibition of Ecm1 by four most potent LOPAC<sup>®</sup>1280 inhibitors verified by RP HPLC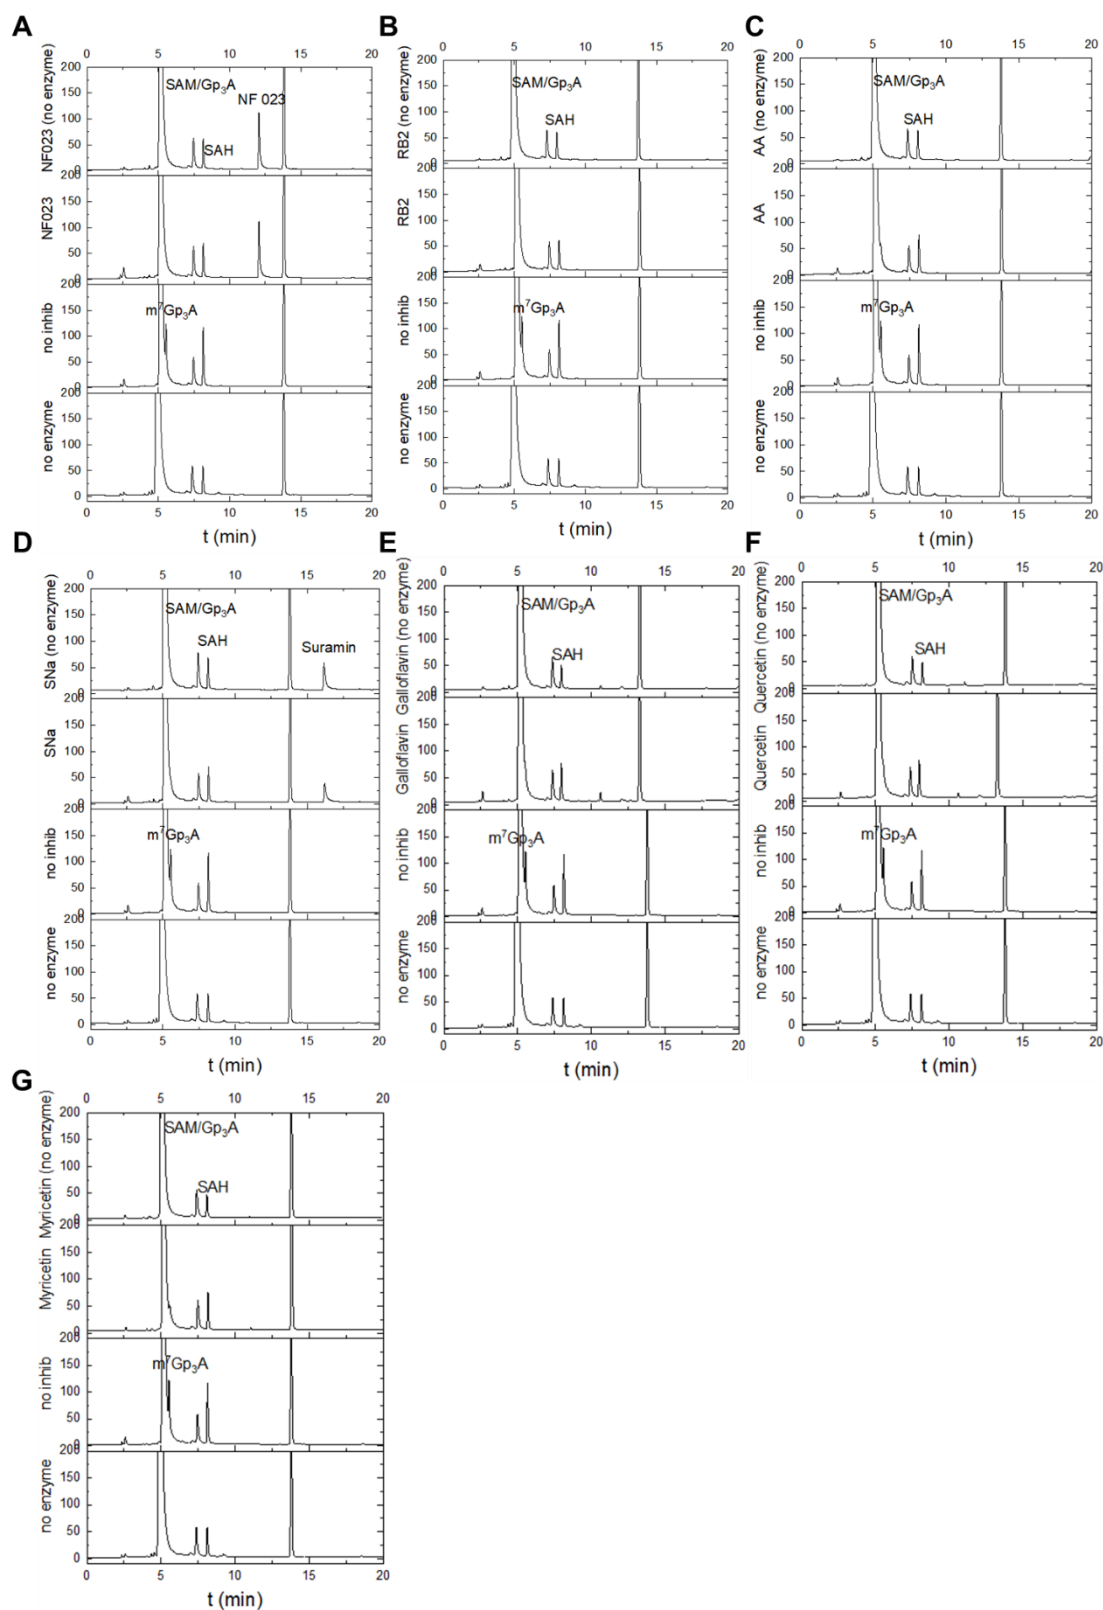

Reaction conditions: 10  $\mu$ M of GppA, 250  $\mu$ M of SAM, 100 nM of Ecm1 and 2  $\mu$ M of inhibitor in total volume 200  $\mu$ l of 50 mM Tris-HCl pH 7.5 buffer. The reactions were incubated for 1.5 h at 30  $^{\circ}$ C with 300 rpm mixing and stopped by 2 min incubation at 95  $^{\circ}$ C.

RP HPLC analysis conditions: Elution with linear gradient of methanol (50% at 15 min) in 0.05 M ammonium acetate buffer pH 5.9.

## SUPPORTING INFORMATION

**Figure S8.** Relative progress of Ecm1 catalyzed methylation of GpppA in the presence of selected inhibitors from LOPAC<sup>®</sup>1280 library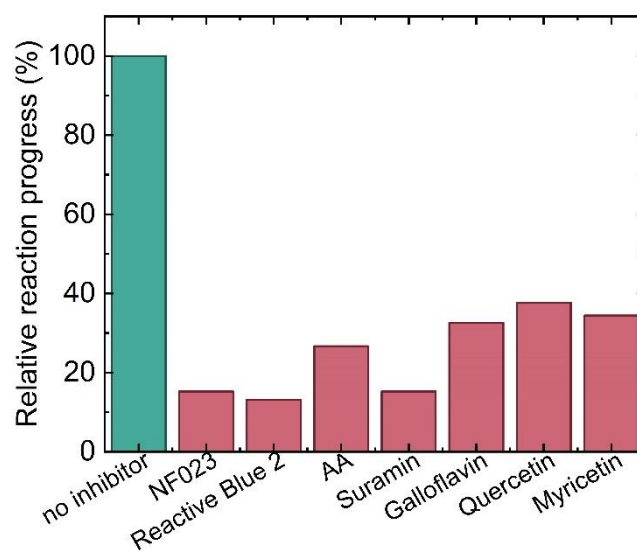

Data taken from chromatograms presented in Figure S7.

**Figure S9.** N7-methylation of probe **6b** by VCE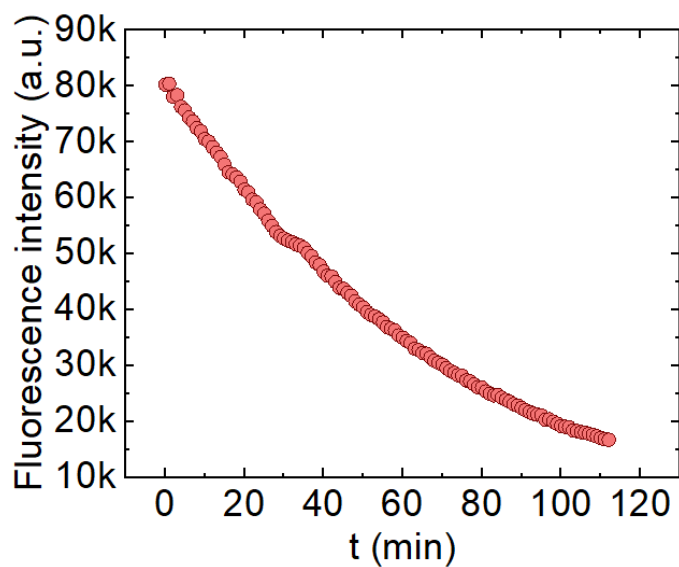

Reaction conditions: 2  $\mu$ M of probe **6b**, 5U of VCE, 50  $\mu$ M of SAM. The experiment was carried out on plate reader in 50 mM Tris-HCl pH 7.5 buffer at 30  $^{\circ}$ C.



## SUPPORTING INFORMATION

**Figure S10.** Inhibition of VCE N7-methyltransferase activity towards probe **6b** by selected compounds and sinefungin as a reference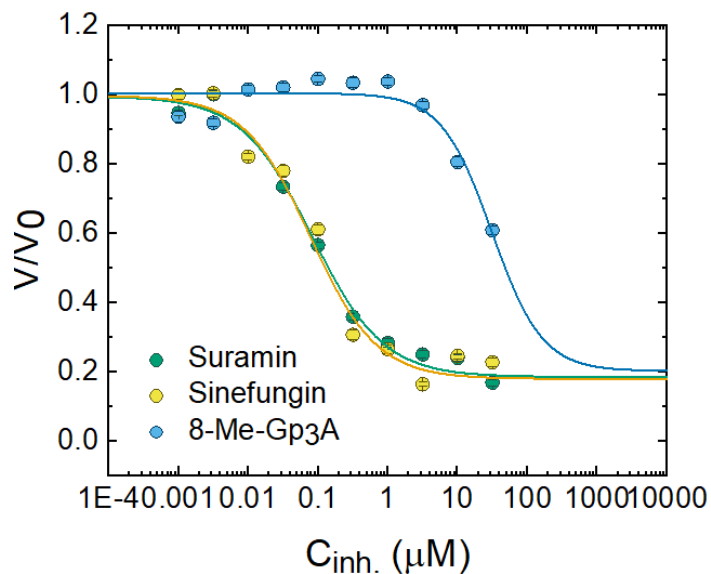

All reaction mixtures contained probe **6b** (2  $\mu\text{M}$ ), SAM (50  $\mu\text{M}$ ) and VCE (5U) in 50 mM Tris-HCl buffer pH 7.5. The mixtures were incubated at 30 °C in a 96-well plate. The fluorescence measurements were carried out for excitation at 345 nm and emission at 378 nm using plate reader. Data shown are mean values of 3 independent experiments  $\pm$  SD. The determined IC<sub>50</sub> values are shown in Table 4.

**Figure S11.** Comparison of IC<sub>50</sub> values for selected inhibitors in reference to IC<sub>50</sub> for sinefungin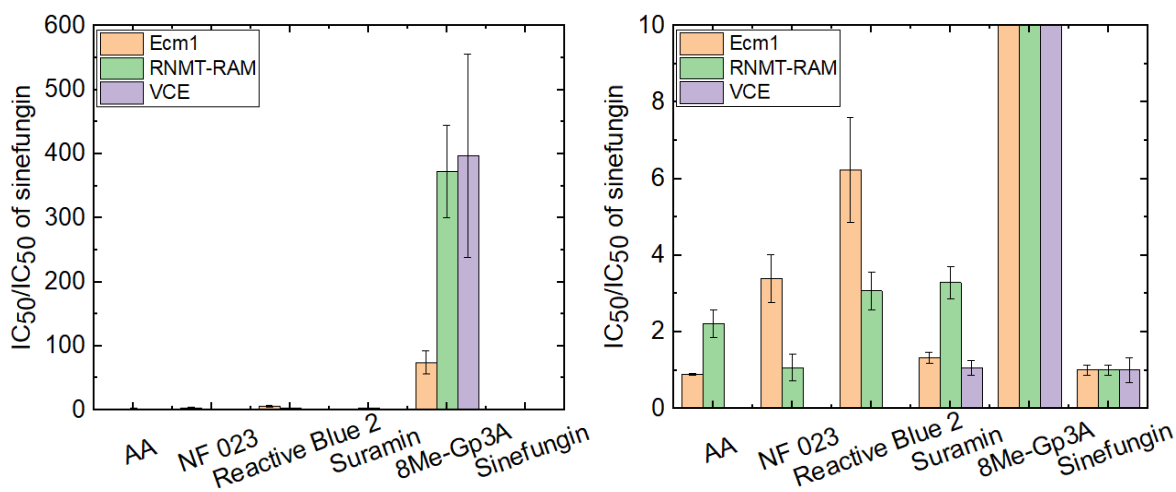

## SUPPORTING INFORMATION

## Supplementary Tables

**Table S1.** Yields of the synthesis of fluorescently labelled nucleotides

| Compound number | HPLC yield | Yield after purification |
|-----------------|------------|--------------------------|
| 6a              | 89%        | 34% [b]                  |
| 6b              | 94%        | 61% [b]                  |
| 6c              | 85%        | 10% [a]                  |
| 6d              | 93%        | 53% [b]                  |
| 6e              | 83%        | 52% [b]                  |
| 6f              | 79%        | 9% [b]                   |
| 6g              | 72%        | 10% [a]                  |
| 7               | 92%        | 28% [b]                  |
| 8               | 96%        | 37% [b]                  |
| 9               | 92%        | 42% [b]                  |
| 10a             | 65%        | 43% [b]                  |
| 10b             | 88%        | 41% [b]                  |

[a] purification with analytical RP HPLC. [b] purification with semipreparative RP HPLC.

**Table S2.** Conditions recommended to use in Ecm1 activity assay

|                        |                                         |                                                       |
|------------------------|-----------------------------------------|-------------------------------------------------------|
| Sample composition     | Optimal probe concentration             | 2 $\mu$ M                                             |
|                        | Optimal SAM concentration               | 50 $\mu$ M                                            |
|                        | Optimal enzyme concentration            | 10 nM                                                 |
|                        | Buffer                                  | 50 mM Tris-HCl pH 7.5                                 |
| Measurement conditions | Excitation/emission wavelength of probe | 345 nm/378 nm                                         |
|                        | Temperature                             | 30 $^{\circ}$ C                                       |
|                        | Pre-incubation conditions               | 15 min/300 rpm plus 20 min measurement without enzyme |

**Table S3.** Conditions recommended to use in RNMT–RAM activity assay

|                        |                                         |                                                       |
|------------------------|-----------------------------------------|-------------------------------------------------------|
| Sample composition     | Optimal probe concentration             | 2 $\mu$ M                                             |
|                        | Optimal SAM concentration               | 20 $\mu$ M                                            |
|                        | Optimal enzyme concentration            | 20 nM                                                 |
|                        | Buffer                                  | 50 mM Tris-HCl pH 7.5                                 |
| Measurement conditions | Excitation/emission wavelength of probe | 345 nm/378 nm                                         |
|                        | Temperature                             | 30 $^{\circ}$ C                                       |
|                        | Pre-incubation conditions               | 15 min/300 rpm plus 20 min measurement without enzyme |

## SUPPORTING INFORMATION

**Table S4.** IC<sub>50</sub> values calculated for compounds selected from LOPAC<sup>®</sup>1280 library

| Lp  | Compound | Full name                                                       | IC <sub>50</sub> (μM) | p            |
|-----|----------|-----------------------------------------------------------------|-----------------------|--------------|
| 1.  | P1_F5    | Aurintricarboxylic acid                                         | 0.036 ± 0.005         | -2.79 ± 0.76 |
| 2.  | P1_F8    | Sandoz 58-035                                                   | > 100                 | -            |
| 3.  | P2_B3    | 2-(methylthio)adenosine 5'diphosphate trisodium salt hydrate    | 1.73 ± 0.24           | -3.43 ± 0.79 |
| 4.  | P2_D11   | p-Benzoquinone                                                  | 3.3 ± 1.6             | -0.60 ± 0.17 |
| 5.  | P2_G10   | ARL 67156 trisodium salt                                        | > 100                 | -            |
| 6.  |          | Sinefungin                                                      | 0.020 ± 0.004         | -1.30 ± 0.17 |
| 7.  | P4_A2    | Icaritin                                                        | 38.1 ± 11.8           | -3.33 ± 5.46 |
| 8.  | P4_B10   | Cefsulodin sodium salt hydrate                                  | 0.34 ± 0.05           | -2.11 ± 0.40 |
| 9.  | P4_C10   | Caffeic acid phenethyl ester                                    | 5.26 ± 0.78           | -1.60 ± 0.27 |
| 10. | P4_C11   | Lumefantrine                                                    | > 100                 | -            |
| 11. | P4_D6    | (-)-Cotinine                                                    | > 100                 | -            |
| 12. | P4_D9    | Cefotaxime sodium salt                                          | 13.0 ± 1.1            | -2.80 ± 0.51 |
| 13. | P4_H8    | Calcimycin                                                      | 13.4 ± 1.4            | -2.80 ± 0.69 |
| 14. | P6_A4    | Bisdemethoxycurcumin                                            | 3.28 ± 0.82           | -0.71 ± 0.11 |
| 15. | P7_C11   | GW5074                                                          | 2.26 ± 0.23           | -1.87 ± 0.30 |
| 16. | P7_E11   | GW7647                                                          | 10.8                  | -18.5        |
| 17. | P8_H4    | 6-Hydroxy-DL-DOPA                                               | 0.31 ± 0.01           | -3.49 ± 0.92 |
| 18. | P8_H5    | Hispidin                                                        | 1,30 ± 0.13           | -1.49 ± 0.24 |
| 19. | P9_G2    | Mifamurtide                                                     | 0.23 ± 0.03           | -2.09 ± 0.49 |
| 20. | P10_B11  | Myricetin                                                       | 0.14 ± 0.01           | -2.71 ± 0.49 |
| 21. | P10_F7   | Morin                                                           | 0.43 ± 0.05           | -1.75 ± 0.27 |
| 22. | P10_F11  | MRS2159                                                         | 0.75 ± 0.06           | -1.97 ± 0.30 |
| 23. | P11_A11  | NF 023                                                          | 0.015                 | -0.84 ± 0.14 |
| 24. | P11_D2   | JNJ-40418677                                                    | 14.3 ± 2.3            | -1.06 ± 0.19 |
| 25. | P11_E8   | Gossypol from cotton seeds                                      | 0.39 ± 0.05           | -1.79 ± 0.25 |
| 26. | P11_H8   | Nordihydroguaiaretic acid from Larreadivaricata (creosote bush) | 0.89 ± 0.24           | -1.25 ± 0.37 |
| 27. | P12_B4   | Oleic Acid                                                      | 2.00 ± 0.49           | -1.14 ± 0.30 |
| 28. | P12_D6   | Piceatannol                                                     | 1.00 ± 0.05           | -3.00 ± 0.54 |
| 29. | P13_B4   | Protoporphyrin IX                                               | 0.30 ± 0.03           | -1.88 ± 0.52 |
| 30. | P13_B10  | Pyridostatintrifluoroacetate salt                               | 2.45 ± 0.58           | -1.92 ± 0.40 |
| 31. | P13_D10  | Quercetin dihydrate                                             | 0.12 ± 0.02           | -1.34 ± 0.25 |
| 32. | P13_G11  | Candesartan cilexetil                                           | 4.66 ± 0.23           | -2.71 ± 0.20 |
| 33. | P14_A5   | Ro 8-4304                                                       | 0.43 ± 0.03           | -1.58 ± 0.13 |
| 34. | P14_A7   | Auranofin                                                       | 3.38 ± 0.98           | -1.43 ± 0.42 |
| 35. | P14_B3   | Rottlerin                                                       | 2.78 ± 0.16           | -3.47 ± 1.12 |

## SUPPORTING INFORMATION

|     |         |                                   |               |              |
|-----|---------|-----------------------------------|---------------|--------------|
| 36. | P14_B5  | Reactive Blue 2                   | 0.043 ± 0.007 | -1.33 ± 0.21 |
| 37. | P14_B9  | N-Oleoyldopamine                  | 47.4          | -6.71        |
| 38. | P14_D6  | 7,8-Dihydroxyflavone hydrobromide | 0.92 ± 0.07   | -1.56 ± 0.14 |
| 39. | P14_D9  | SCH-202676 hydrobromide           | 1.96 ± 0.12   | -3.19 ± 0.39 |
| 40. | P15_D6  | Tetradecylthioacetic acid         | 5.90 ± 0.52   | -2.61 ± 0.39 |
| 41. | P15_D11 | Tyrphostin 23                     | 3.19 ± 0.24   | -1.86 ± 0.20 |
| 42. | P15_F7  | TTNPB                             | 32.2 ± 1.4    | -5.00        |
| 43. | P15_G3  | Suraminhexasodium                 | 0.046 ± 0.006 | -1.38 ± 0.19 |
| 44. | P16_C2  | Tyrphostin 47                     | 0.35 ± 0.04   | -2.58 ± 0.46 |
| 45. | P16_D2  | Tyrphostin 51                     | 0.15 ± 0.02   | -1.28 ± 0.18 |
| 46. | P16_E8  | Galloflavin                       | 0.12 ± 0.02   | -2.13 ± 0.63 |
| 47. | P16_G4  | XCT790                            | > 100         | --           |
| 48. | P16_H3  | IPA-3                             | 13.2 ± 4.4    | -0.38 ± 0.06 |
| 49. | P3_A7   | Bupropion hydrochloride           | > 100         | -            |
| 50. | P3_A8   | Arvanil                           | 17.4 ± 3.6    | -0.98 ± 0.18 |
| 51. | P3_A10  | CGP-7930                          | > 100         | -            |
| 52. | P3_B9   | PF 3845 hydrate                   | > 100         | -            |
| 53. | P3_G7   | BTCP hydrochloride                | > 100         | -            |
| 54. | P3_G8   | Rhodblock 6                       | > 100         | -            |
| 55. | P3_G9   | Caffeine                          | > 100         | -            |
| 56. | P3_G10  | Chlorpropamide                    | 34.3          | -13.44       |
| 57. | P3_G5   | Alfuzosin hydrochloride           | > 100         | -            |

Dark green – compounds with  $IC_{50} < 0.05 \mu M$

Light green – compounds with  $IC_{50}$  between  $0.05 \mu M$  and  $0.5 \mu M$

Yellow – sinesfungin control

## SUPPORTING INFORMATION

## Experimental Procedures

## General Information

Synthesized non-fluorescent nucleotides were purified by ion-exchange chromatography on DEAE-Sephadex A-25 ( $\text{HCO}_3^-$  form) column. A column was loaded with reaction mixture and washed through with excess of water to remove metal (II) salt/EDTA complex. The nucleotides were eluted using a linear gradient of triethylammonium bicarbonate buffer (TEAB) in deionized water. The collected fractions were analyzed spectrophotometrically at 260 nm. After evaporation under reduced pressure with repeated additions of ethanol to decompose TEAB, compounds were isolated as triethylammonium (TEA) salts. Yields were calculated based on either sample weight or (preferably) optical milliunits (opt.mu) of the product. Optical unit measurements were performed in 0.1 M phosphate buffer pH 7 at 260 nm.

Analytical HPLC was performed on Agilent Tech. Series 1200 using (RP)Supelcosil LC-18-T HPLC column (4.6 x 250 mm, flow rate 1.3 mL/min) with a different linear gradient of methanol or acetonitrile in 0.05 M ammonium acetate buffer (pH 5.9). UV-detection was performed at 260 nm, as well as fluorescent label absorption maximum and fluorescence detection (at 360 nm for non-labelled compounds and at fluorescence tag emission maximum for labelled nucleotides).

Semipreparative HPLC was performed on the same apparatus equipped with Discovery RP Amide C-16 HPLC column (25 cm x 21.2 mm, 5  $\mu\text{m}$ , flow rate 5.0 mL/min) or Grace Vision HT C18 HL column (250 cm x 22 mm, 10  $\mu\text{m}$ , flow rate 5.0 mL/min) with different linear gradients of acetonitrile in 0.05 M ammonium acetate buffer (pH 5.9). UV-detection was performed at 260 nm, as well as fluorescent label absorption maximum and fluorescence detection (at 360 nm for non-labelled compounds and at fluorescence tag emission maximum for labelled nucleotides).

HPLC methods used in the studies are listed below:

| Method name | Eluent A                                | Eluent B                   | Eluent gradient          | Column                              |
|-------------|-----------------------------------------|----------------------------|--------------------------|-------------------------------------|
| A           | 0.05 M ammonium acetate buffer (pH 5.9) | ACN                        | 0 – 100%<br>(0 – 15 min) | (RP)Supelcosil LC-18-T              |
| P1          | 0.05 M ammonium acetate buffer (pH 5.9) | 70% of eluent A/30% of ACN | 0 – 50%<br>0 – 240 min   | Grace Vision HT C18 HL              |
| P2          | 0.05 M ammonium acetate buffer (pH 5.9) | 70% of eluent A/30% of ACN | 0 – 50%<br>0 – 120 min   | Discovery RP Amide C-16 HPLC column |
| P3          | 0.05 M ammonium acetate buffer (pH 5.9) | 70% of eluent A/30% of ACN | 0 – 50%<br>0 – 90 min    | Discovery RP Amide C-16 HPLC column |
| P4          | 0.05 M ammonium acetate buffer (pH 5.9) | 70% of eluent A/30% of ACN | 0 – 50%<br>0 – 60 min    | Grace Vision HT C18 HL              |
| P5          | 0.05 M ammonium acetate buffer (pH 5.9) | ACN                        | 0 – 100%<br>0 – 120 min  | Grace Vision HT C18 HL              |
| P6          | 0.05 M ammonium acetate buffer (pH 5.9) | ACN                        | 0 – 100%<br>0 – 120 min  | Discovery RP Amide C-16 HPLC column |
| P7          | 0.05 M ammonium acetate buffer (pH 5.9) | ACN                        | 0 – 100%<br>0 – 240 min  | Grace Vision HT C18 HL              |

The structure and homogeneity of each final product was confirmed by RP HPLC and high resolution mass spectrometry HRMS (ESI-). Intermediate products were characterized by low resolution MS (ESI-) or  $^1\text{H}$  NMR,  $^1\text{H}$ - $^1\text{H}$  COSY and  $^{31}\text{P}$  NMR spectroscopy. Mass spectra were recorded on Thermo Scientific LTQ Orbitrap Velos (high resolution) and Sciex QTRAP 3200 (low resolution) spectrometers. Routine  $^1\text{H}$  NMR, COSY and  $^{31}\text{P}$  NMR spectra were run in pure  $\text{D}_2\text{O}$  at 25  $^\circ\text{C}$  and nucleotide concentration of 1–5 mM on a Bruker AVANCE III spectrometer at 500.24 MHz ( $^1\text{H}$ ,  $^1\text{H}$ - $^1\text{H}$  COSY) and 202.5 MHz ( $^{31}\text{P}$ ) or Varian INOVA 400 MHz at 399.94 ( $^1\text{H}$ ,  $^1\text{H}$ - $^1\text{H}$  COSY) and 161.90 ( $^{31}\text{P}$ ). The  $^1\text{H}$  chemical shifts were determined relative to internal standard sodium 3-trimethylsilyl-[2,2,3,3- $^2\text{H}_4$ ]-propionate (TSP), and the  $^{31}\text{P}$  chemical shifts relative to external standard 20%  $^2\text{H}_3\text{PO}_4$ .

The Ecm1 protein was expressed and purified at the Laboratory of Bioorganic Chemistry, Centre of New Technologies, University of Warsaw, Poland. The RNMT-RAM protein was expressed and purified at the Centre of Gene Regulation and Expression, School of Life Sciences, University of Dundee, Dundee, UK. The vaccinia capping enzyme (VCE) and S-adenosyl-L-methionine (SAM) were purchased from New England BioLabs.

## SUPPORTING INFORMATION

## Chemical Synthesis

All solvents and chemical reagents for non-fluorescent nucleotides synthesis were purchased from Sigma-Aldrich and used without any pre-treatment. Dye azides used for CuAAC reactions: pyrene, perylene, BDP-FL, cyanine 3 and cyanine 5 with PEG linker and azide moiety were purchased from Lumiprobe. 5-N-(2-azidoethyl)-fluorescein amide ((5)FAM) was synthesized as described previously<sup>[1]</sup>. Guanosine, guanosine 5'-monophosphate disodium salt and adenosine 5'-monophosphate free acid form were purchased from Sigma Aldrich. LOPAC<sup>®1280</sup> library of pharmacologically active compounds was purchased from Sigma Aldrich. Propargyl-modified mononucleotide analogues were all synthesized in our laboratory as described previously.<sup>[2]</sup> Synthesis of the following C8- and C6- modified nucleotides has also been described: 8-Me-GMP,<sup>[3]</sup> 8-CF<sub>3</sub>-Gp<sub>3</sub>A<sup>[4]</sup> and 6S-GMP<sup>[5]</sup>. Synthesis of 8-Ph-GMP will be published elsewhere.

## Synthesis of alkyne-modified non-fluorescent nucleotides

*P1-5'-guanosine-P3-(N-propargyl)-3'-carbamoyladenine triphosphate ammonium salt (Gp<sub>3</sub>A-3'-O-cp, 1)*

Triethylammonium salt of GMP (70 mg, 0.15 mmol) was mixed with lithium salt of cpADP-Im (41 mg, 0.072 mmol) and MgCl<sub>2</sub> (95 mg, 1 mmol) in DMF (1 mL). The reaction was carried out at a room temperature for 17.5 h and stopped by addition of 10 mL of H<sub>2</sub>O. The reaction product was purified using semipreparative RP HPLC (Method P1). The collected eluate was lyophilized repeatedly to afford 16.5 mg (0.018 mmol) of **1** as a white solid and .11 mg (0.012 mmol) of 2'-O isomer. HPLC yield: 100%. Yield after purification: 41% (25% for isomer 3'-O only). HRMS (-)ESI *m/z* found: 852.0919, calc. for C<sub>24</sub>H<sub>29</sub>N<sub>11</sub>O<sub>18</sub>P<sub>3</sub>: 852.0910; <sup>1</sup>H NMR (500 MHz, D<sub>2</sub>O): 8.49 (1H, s, H<sub>C2</sub>-Ado), 8.24 (1H, s, H<sub>C8</sub>-Ado), 8.03 (1H, s, H<sub>C8</sub>-Guo), 6.04 (1H, d, *J* = 6.9 Hz, H<sub>1</sub>-Ado), 5.78 (1H, d, *J* = 5.5 Hz, H<sub>1</sub>-Guo), 5.34 (1H, m, H<sub>3</sub>-Ado), 4.89 (1H, t, *J* = 5.9, H<sub>2</sub>-Ado), 4.67 (1H, t, *J* = 5.5, H<sub>2</sub>-Guo), 4.50 (2H, m), 4.28 (5H, m), 3.95 (2H, s, H<sub>propargyl 3'-O</sub>), 2.63 (1H, s, H<sub>propargyl 3'-O</sub>), <sup>31</sup>P NMR (202 MHz, D<sub>2</sub>O): -10.42 (2P, m, P<sub>α</sub>, P<sub>γ</sub>), -22.09 (1P, t, *J* = 19.2 Hz, P<sub>β</sub>).

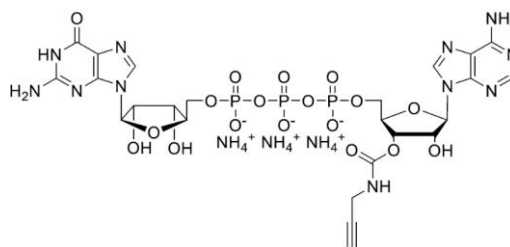*P1-5'-((N-propargyl)-2'(3)-carbamoylo)guanosine-P3-3'-adenosine triphosphate ammonium salt (2'-O/3'-O-cp-Gp<sub>3</sub>A, 2)*

Triethylammonium salt of AMP (38 mg, 0.085 mmol) was mixed with lithium salt of 2'/3'-O-cpGDP-Im (18.8 mg, 0.031 mmol) and MgCl<sub>2</sub> (46 mg, 0.484 mmol) in DMSO (0.5 mL) and DMF (0.1 mL). The reaction was carried out at a room temperature for 6 h and stopped by addition of 4 mL of H<sub>2</sub>O. The reaction product was purified using semipreparative RP HPLC (Method P2). The collected eluate was lyophilized repeatedly to afford 10 mg (0.011 mmol) of **2** as a white solid. HPLC yield: 100%. Yield after purification: 35%. HRMS (-)ESI *m/z* found: 852.0924, calc. for C<sub>24</sub>H<sub>29</sub>N<sub>11</sub>O<sub>18</sub>P<sub>3</sub>: 852.0910; <sup>1</sup>H NMR (500 MHz, D<sub>2</sub>O): 8.41 (1H, s, H<sub>C2</sub>-Ado (2'-O isomer)), 8.40 (1H, s, H<sub>C2</sub>-Ado (3'-O isomer)), 8.18 (1H, s, H<sub>C8</sub>-Ado (3'-O isomer)), 8.18 (1H, s, H<sub>C8</sub>-Ado (2'-O isomer)), 8.02 (1H, s, H<sub>C8</sub>-Guo (3'-O isomer)), 7.92 (1H, s, H<sub>C8</sub>-Guo (2'-O isomer)), 6.03 (1H, d, *J* = 4.7 Hz, H<sub>1</sub>-Ado (2'-O isomer)), 6.02 (1H, d, *J* = 5.1 Hz, H<sub>1</sub>-Ado (3'-O isomer)), 5.88 (1H, d, *J* = 3.0 Hz, H<sub>1</sub>-Guo (2'-O isomer)), 5.78 (1H, d, *J* = 7.2 Hz, H<sub>1</sub>-Guo (3'-O isomer)), 5.34 (1H, m, H<sub>2</sub>-Guo (2'-O isomer)), 5.31 (1H, m, H<sub>3</sub>-Guo (3'-O isomer)), 4.91 (1H, m, H<sub>2</sub>-Guo (3'-O isomer)), 4.65 (3H, m, H<sub>2</sub>-Ado (3'O isomer), H<sub>3</sub>-Guo (2'O isomer), one more H from 2'O isomer), 4.52 (2H, m), 4.42 (1J, m, H<sub>4</sub>-Guo (3'-O isomer)), 4.35-4.26 (11H, m), 3.93 (1H, s, H<sub>propargyl (3'-O isomer)</sub>), 3.88 (1H, m, H<sub>propargyl (2'-O isomer)</sub>), 2.63 (1H, s, H<sub>propargyl (3'-O isomer)</sub>), 2.59 (1H, t, *J* = 2.4 Hz, H<sub>propargyl (2'-O isomer)</sub>). <sup>31</sup>P NMR (202 MHz, D<sub>2</sub>O): -10.42 (2P, m, P<sub>α</sub>, P<sub>γ</sub>), -22.04 (1P, t, *J* = 18.6 Hz, P<sub>β</sub>).

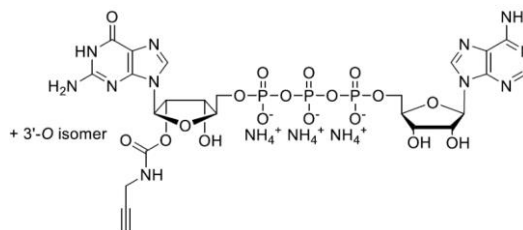*P1-5'-guanosine-P3-3'-N6-propargyloadenosine triphosphate ammonium salt (Gp<sub>3</sub>A(N6)prop, 3)*

Triethylammonium salt of AMP-N6-propargyl (45 mg, 0.093 mmol) was mixed with sodium salt of GDP-Im (23 mg, 0.043 mmol) and ZnCl<sub>2</sub> (40 mg, 0.295 mmol) in DMF (0.5 mL). The reaction was carried out at a room temperature for 22 h and stopped by addition of Na<sub>2</sub>EDTA (110 mg, 0.295 mmol) in 10 mL of H<sub>2</sub>O. The pH was adjusted to 7.0 by addition of NaHCO<sub>3</sub>. The reaction product was purified using semipreparative RP HPLC (Method P4). The collected eluate was lyophilized repeatedly to afford 5.4 mg (6.3 μmol) of **3** as a white solid. HPLC yield: 77%. Yield after purification: 15%. HRMS (-)ESI *m/z* found: 809.0862, calc. for C<sub>23</sub>H<sub>28</sub>N<sub>10</sub>O<sub>17</sub>P<sub>3</sub>: 809.0852; <sup>1</sup>H NMR (500 MHz, D<sub>2</sub>O): 8.38 (1H, s, H<sub>C2</sub>-Ado), 8.23 (1H, s, H<sub>C8</sub>-Ado), 8.02 (1H, s, H<sub>C8</sub>-Guo), 6.06 (1H, d, *J* = 4.7 Hz, H<sub>1</sub>-Ado), 5.78 (1H, d, *J* = 5.0 Hz, H<sub>1</sub>-Guo), 4.65 (1H, t, *J* = 4.7 Hz, H<sub>2</sub>-Ado), 4.61 (1H, t, *J* = 5.0, H<sub>2</sub>-Guo), 4.51 (1H, t, *J* = 5.0, H<sub>3</sub>-Guo), 4.47 (1H, t, *J* = 4.7 Hz, H<sub>3</sub>-Ado), 4.36-4.24 (8H, m, H<sub>4',5',5''</sub>-Ado, H<sub>4',5',5''</sub>-Guo, H<sub>propargyl N6</sub>), 2.00 (1H, s, H<sub>propargyl N6</sub>), <sup>31</sup>P NMR (202 MHz, D<sub>2</sub>O): -10.49 (2P, m, P<sub>α</sub>, P<sub>γ</sub>), -22.09 (1P, t, *J* = 18.4 Hz, P<sub>β</sub>).

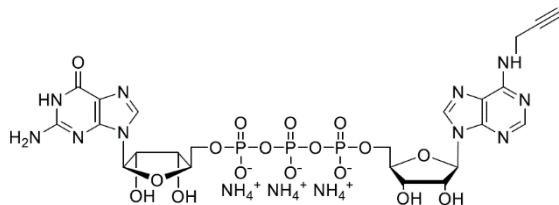

## SUPPORTING INFORMATION

*P1-5'-guanosine-P3-(N-propargyl)-3'-carbamoyladenine triphosphate ammonium salt (Gp<sub>3</sub>G(N1)prop, 4)*

Sodium salt of GMP-N1-propargyl *P*-imidazole (8.7 mg, 208 ODU, 17.2 μmol) was mixed with triethylammonium salt of GDP (17.6 mg, 27.4 μmol, 1.6 eq) and ZnCl<sub>2</sub> (19.1 mg, 140.5 μmol, 8.5 eq) in an anhydrous DMF (172 μL). Reaction was mixed overnight at a room temperature and progress was monitored with HPLC on the other day. The reaction was quenched with aqueous solution of Na<sub>2</sub>EDTA (51.4 mg, 141 μmol) and pH was adjusted to pH = 6 with a solid NaHCO<sub>3</sub>. Product was purified using RP-HPLC (Method 3). The collected eluate was lyophilized repeatedly to afford 7.9 mg (9.0 μmol) of **4** as a white solid. HPLC yield: 87%. Yield after purification: 52%. HRMS (-)ESI *m/z* found: 825.0814, calc. for C<sub>23</sub>H<sub>28</sub>N<sub>10</sub>O<sub>18</sub>P<sub>3</sub><sup>-</sup>: 825.0801; <sup>1</sup>H NMR: (400 MHz, D<sub>2</sub>O) δ 7.99 (2H, d, *J* = 4.8 Hz, H<sub>C8</sub>-Guo), 5.83 (1H, d, *J* = 5.6 Hz, H<sub>1</sub>-Guo), 5.81 (1H, d, *J* = 5.6 Hz, H<sub>1</sub>-Guo), 4.82 (2H, overlapped with HDO peak, H<sub>propargyl</sub> N1), 4.79 (2H, overlapped with HDO peak, H<sub>2</sub>-Guo), 4.52-4.48 (2H, m, H<sub>3</sub>-Guo), 4.31-4.29 (2H, m, H<sub>4</sub>-Guo), 4.27-4.23 (4H, m, H<sub>5',5''</sub>-Guo), 2.73 (1H, t, *J* = 2.5 Hz, H<sub>propargyl</sub> N1); <sup>31</sup>P NMR: (162 MHz, D<sub>2</sub>O) δ -10.57 (dtd, *J*<sub>1</sub> = 19.3, *J*<sub>2</sub> = 6.0, *J*<sub>3</sub> = 1.2 Hz, P<sub>α</sub>, P<sub>γ</sub>), -22.31 (t, *J* = 19.3 Hz, P<sub>β</sub>).

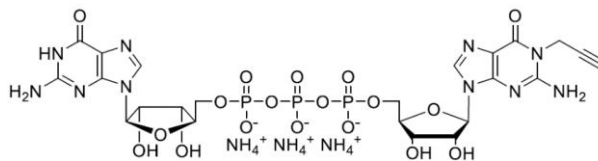*P1-5'-(7-methyl)guanosine-P3-(N-propargyl)-3'-carbamoyladenine triphosphate ammonium salt (m<sup>7</sup>Gp<sub>3</sub>A-3'-O-cp, 5)*

Ammonium salt 3'-O-Gp<sub>3</sub>Acp (**1**) (1.0 mg, 1.1 μmol) was dissolved to 0.18 M concentration in 60 μL of H<sub>2</sub>O and the pH was adjusted to 4 by 30% acetic acid. Then 10 equivalents of (CH<sub>3</sub>)<sub>2</sub>SO<sub>4</sub> were added every 5 min to the reaction mixture under stirring. 10% KOH was added if necessary to keep the pH at 4 value. The reaction was stopped after 4.5 h by addition of 0.8 mL of H<sub>2</sub>O. Organic-soluble compounds were removed by extraction with diethyl ether repeated three times. The reaction product was purified using semipreparative RP HPLC (Method P1). The collected eluate was lyophilized repeatedly to afford 0.5 mg (0.54 μmol) of **5** as a white solid. HPLC yield: 93%. Yield after purification: 49%. HRMS (-)ESI *m/z* found: 866.1070, calc. for C<sub>25</sub>H<sub>31</sub>N<sub>11</sub>O<sub>18</sub>P<sub>3</sub><sup>-</sup>: 866.1067; <sup>1</sup>H NMR (500 MHz, D<sub>2</sub>O): 8.45 (1H, s, H<sub>C2</sub>-Ado), 8.16 (1H, s, H<sub>C8</sub>-Guo), 6.02 (1H, d, *J* = 6.0 Hz, H<sub>1</sub>-Ado), 5.84 (1H, d, *J* = 3.6 Hz, H<sub>1</sub>-Guo), 5.34 (1H, m, H<sub>3</sub>-Ado), 4.88 (1H, t, *J* = 6.0 Hz, H<sub>2</sub>-Ado), 4.46 (1H, dd, *J*<sub>1</sub> = 4.5 Hz, *J*<sub>2</sub> = 3.6 Hz, H<sub>2</sub>-Guo), 4.39 (2H, m), 4.37-4.33 (2H, m), 4.29-4.26 (3H, m), 4.00 (3H, s, -CH<sub>3</sub>(N7)), 3.95 (2H, m, H<sub>propargyl</sub> 3'-O), 2.63 (1H, m, H<sub>propargyl</sub> 3'-O); <sup>31</sup>P NMR (202 MHz, D<sub>2</sub>O): -10.67 (2P, m, P<sub>α</sub>, P<sub>γ</sub>), -22.19 (1P, t, *J* = 19.3 Hz, P<sub>β</sub>).

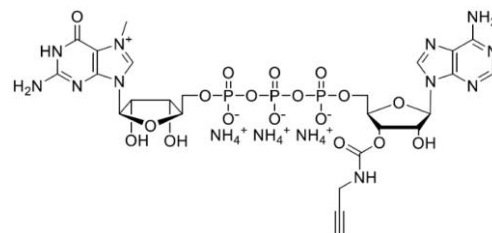

## Synthesis of fluorescently labelled nucleotides

For the synthesis of fluorescently labelled nucleotide analogues dye azides were used. Pyrene azide (Py), perylene azide (Pe), BODIPY-FL azide (BODIPY-FL), cyanine 3 azide (Cy3) and cyanine 5 azide (Cy5) were purchased from Lumiprobe. Pyrene azide 3 (Py3) was purchased from APEX BIO. 5-N-(2-azidoethyl)-fluorescein amide ((5)FAM) was synthesized as described before.<sup>[1]</sup> The structures of all used fluorescent tags are presented below.

Pyrene azide (Py)

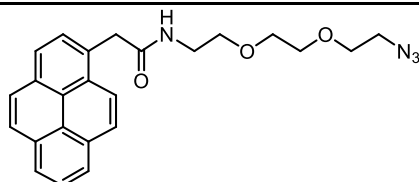

Pyrene azide 3(Py3)

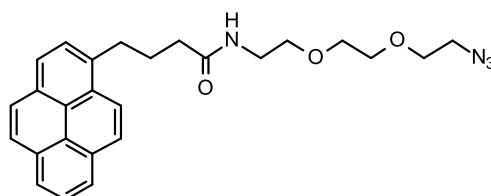

Perylene azide (Pe)

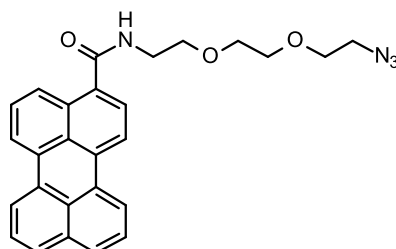

## SUPPORTING INFORMATION

BDPY-FL azide (BDPY-FL)

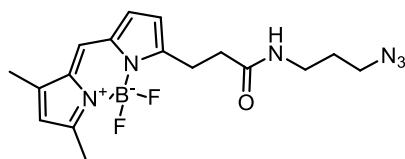

(5)-carboxyfluorescein azide ((5)FAM)

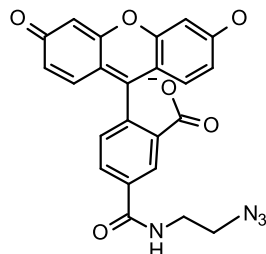

Cyanine 3 azide (Cy3)

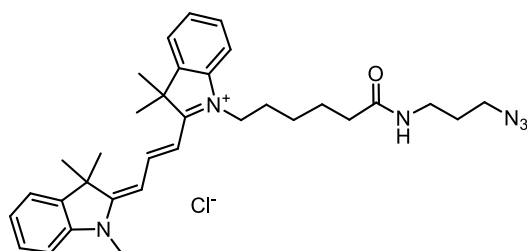

Cyanine 5 azide (Cy5)

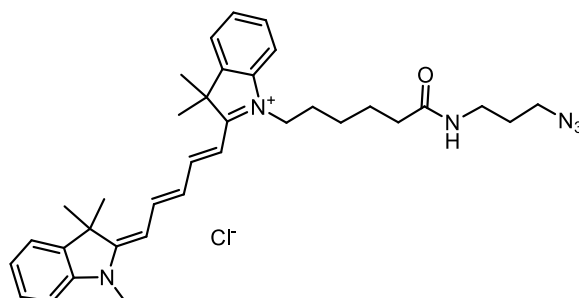**Gp<sub>3</sub>A-3'-O-Py (6a)**

Aqueous solution of Gp<sub>3</sub>A-3'-O-cp (**1**) ammonium salt (1.0 mg, 1.1 μmol, 40 μL, 0.027 M) was mixed with pyrene azide (**Py**) (1.8 mg, 4.3 μmol, 0.087 M) in 50 μL of DMSO following by addition of aqueous solutions of CuSO<sub>4</sub>·5H<sub>2</sub>O (0.75 mg, 3.0 μmol, 3.0 μL, 1.0 M) and sodium ascorbate (1.2 mg, 6.0 μmol, 6.0 μL, 1.0 M). The reaction was carried out at a room temperature for 4.5 h and stopped by addition of aqueous Na<sub>2</sub>EDTA (3.7 mg, 10 μmol) in 0.9 mL of H<sub>2</sub>O. The precipitated pyrene dye remains were centrifuged. The reaction product was purified using semipreparative RP HPLC (Method P6). The collected eluate was lyophilized repeatedly to afford 0.5 mg (0.38 μmol) of **6a** as a white solid. HPLC yield: 89%. Yield after purification: 34%. HRMS (-)ESI *m/z* found: 1268.2778, calc. for C<sub>48</sub>H<sub>53</sub>N<sub>15</sub>O<sub>21</sub>P<sub>3</sub><sup>-</sup>: 1268.2759.

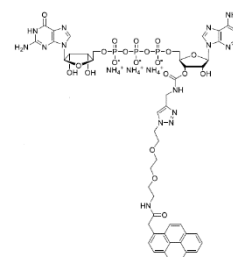**Gp<sub>3</sub>A-3'-O-Py3 (6b)**

Aqueous solution of Gp<sub>3</sub>A-3'-O-cp (**1**) ammonium salt (2.2 mg, 2.4 μmol, 6 μL, 0.40 M) was mixed with pyrene 3 azide (**Py3**) (2.0 mg, 4.5 μmol, 0.09 M) in 50 μL of DMSO following by addition of aqueous solutions of CuSO<sub>4</sub>·5H<sub>2</sub>O (0.75 mg, 3.0 μmol, 3.0 μL, 1.0 M) and sodium ascorbate (1.2 mg, 6.0 μmol, 6.0 μL, 1.0 M). The reaction was carried out at a room temperature for 5.5 h and stopped by addition of aqueous Na<sub>2</sub>EDTA (7.4 mg, 20 μmol) in 0.7 mL of H<sub>2</sub>O. The precipitated pyrene dye remains were centrifuged. The reaction product was purified using semipreparative RP HPLC (Method P5). The collected eluate was lyophilized repeatedly to afford 2.0 mg (1.4 μmol) of **6b** as a white solid. HPLC yield: 94%. Yield after purification: 61%. HRMS (-)ESI *m/z* found: 1296.3072, calc. for C<sub>50</sub>H<sub>57</sub>N<sub>15</sub>O<sub>21</sub>P<sub>3</sub><sup>-</sup>: 1296.3072.

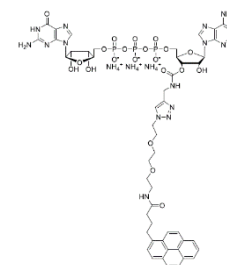



## SUPPORTING INFORMATION

**Gp<sub>3</sub>A-3'-O-Pe (6c)**

Gp<sub>3</sub>A-3'-O-cp (**1**) ammonium salt (0.7 mg, 0.77 μmol) was mixed with perylene azide (**Pe**) (1.3 mg, 2.9 μmol, 0.057 M) in 50 μL of DMSO following by addition of aqueous solutions of CuSO<sub>4</sub>·5H<sub>2</sub>O (0.75 mg, 3.0 μmol, 3.0 μL, 1.0 M) and sodium ascorbate (1.2 mg, 6.0 μmol, 6.0 μL, 1.0 M). The reaction was carried out at a room temperature for 22 h and stopped by addition of aqueous Na<sub>2</sub>EDTA (7.4 mg, 20 μmol) in 0.4 mL of H<sub>2</sub>O. The precipitated pyrene dye remains were centrifuged. The reaction product was purified using analytical RP HPLC (Method A). The collected eluate was lyophilized repeatedly to afford 0.11 mg (0.08 μmol) of **6c** as a yellow solid. HPLC yield: 85%. Yield after purification: 10.5%.

HRMS (-)ESI *m/z* found: 11304.2762, calc. for C<sub>51</sub>H<sub>53</sub>N<sub>15</sub>O<sub>21</sub>P<sub>3</sub><sup>-</sup>: 1304.2759.

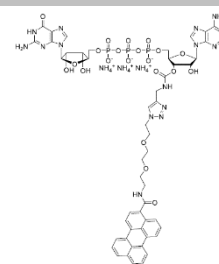**Gp<sub>3</sub>A-3'-O-BDP-FL (6d)**

Aqueous solution of Gp<sub>3</sub>A-3'-O-cp (**1**) ammonium salt (1.0 mg, 1.1 μmol, 40 μL, 0.027 M) was mixed with BDP-FL azide (**BDP-FL**) (2.0 mg, 5.3 μmol, 0.11 M) in 50 μL of DMSO following by addition of aqueous solutions of CuSO<sub>4</sub>·5H<sub>2</sub>O (0.75 mg, 3.0 μmol, 3.0 μL, 1.0 M) and sodium ascorbate (1.2 mg, 6.0 μmol, 6.0 μL, 1.0 M). The reaction was carried out at a room temperature for 7.5 h and stopped by addition of aqueous Na<sub>2</sub>EDTA (5.6 mg, 15 μmol) in 0.95 mL of H<sub>2</sub>O. The precipitated BDP-FL dye remains were centrifuged. The reaction product was purified using semipreparative RP HPLC (Method P6). The collected eluate was lyophilized repeatedly to afford 0.75 mg (0.59 μmol) of **6d** as an orange solid. HPLC yield: 93%. Yield after purification: 53%.

HRMS (-)ESI *m/z* found: 1226.2768, calc. for C<sub>41</sub>H<sub>50</sub>BF<sub>2</sub>N<sub>17</sub>O<sub>19</sub>P<sub>3</sub><sup>-</sup>: 1226.2748.

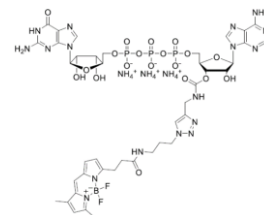**Gp<sub>3</sub>A-3'-O-(5)FAM (6e)**

Aqueous solution of Gp<sub>3</sub>A-3'-O-cp (**1**) ammonium salt (0.7 mg, 0.77 μmol) was mixed with N-(2-azidoethyl)-5-fluorescein-carboxoamide (0.7 mg, 1.58 μmol, 0.05 M) in 30 μL of DMSO following by addition of aqueous solutions of CuSO<sub>4</sub>·5H<sub>2</sub>O (0.75 mg, 3.0 μmol, 3.0 μL, 1.0 M) and sodium ascorbate (1.2 mg, 6.0 μmol, 6.0 μL, 1.0 M). The reaction was carried out at a room temperature for 3 h and stopped by addition of aqueous Na<sub>2</sub>EDTA (7.4 mg, 20 μmol). The precipitated fluorescein dye remains were centrifuged. The reaction product was purified using semipreparative RP HPLC (Method P5). The collected eluate was lyophilized repeatedly to afford 0.54 mg (0.4 μmol) of **6e** as an orange solid. HPLC yield: 83%. Yield after purification: 52%.

HRMS (-)ESI *m/z* found: 1296.1993, calc. for C<sub>47</sub>H<sub>45</sub>N<sub>15</sub>O<sub>24</sub>P<sub>3</sub><sup>-</sup>: 1296.1980.

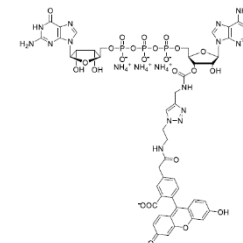**Gp<sub>3</sub>A-3'-O-Cy3 (6f)**

Aqueous solution of Gp<sub>3</sub>A-3'-O-cp (**1**) ammonium salt (0.85 mg, 0.94 μmol, 10 μL, 0.09 M) was mixed with cyanine 3 azide (**Cy3**) (1.2 mg, 2.09 μmol, 0.05 M) in 40 μL of DMSO following by addition of aqueous solutions of CuSO<sub>4</sub>·5H<sub>2</sub>O (0.75 mg, 3.0 μmol, 3.0 μL, 1.0 M) and sodium ascorbate (1.2 mg, 6.0 μmol, 6.0 μL, 1.0 M). The reaction was carried out at a room temperature for 21 h and stopped by addition of aqueous Na<sub>2</sub>EDTA (7.4 mg, 20 μmol) in 0.7 mL of H<sub>2</sub>O. The precipitated cyanine dye remains were centrifuged. The reaction product was purified using semipreparative RP HPLC (Method P6). The collected eluate was lyophilized repeatedly to afford 0.12 mg (0.08 μmol) of **6f** as a red solid. HPLC yield: 79%. Yield after purification: 9%.

HRMS (-)ESI *m/z* found: 1390.4354, calc. for C<sub>57</sub>H<sub>71</sub>N<sub>17</sub>O<sub>19</sub>P<sub>3</sub><sup>-</sup>: 1390.4330;

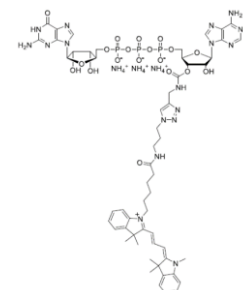**Gp<sub>3</sub>A-3'-O-Cy5 (6g)**

Aqueous solution of Gp<sub>3</sub>A-3'-O-cp (**1**) ammonium salt (1.1 mg, 1.21 μmol) was mixed with cyanine 5 azide (**Cy5**) (2.5 mg, 4.16 μmol, 0.08 M) in 50 μL of DMSO following by addition of aqueous solutions of CuSO<sub>4</sub>·5H<sub>2</sub>O (0.75 mg, 3.0 μmol, 3.0 μL, 1.0 M) and sodium ascorbate (1.2 mg, 6.0 μmol, 6.0 μL, 1.0 M). The reaction was carried out at a room temperature for 4 h and stopped by addition of aqueous Na<sub>2</sub>EDTA (7.4 mg, 20 μmol) in 0.4 mL of H<sub>2</sub>O. The precipitated cyanine dye remains were centrifuged. The reaction product was purified using analytical RP HPLC (Method A). The collected eluate was lyophilized repeatedly to afford 0.18 mg (0.12 μmol) of **6g** as a blue solid. HPLC yield: 72%. Yield after purification: 10%.

HRMS (-)ESI *m/z* found: 1416.4506, calc. for C<sub>59</sub>H<sub>73</sub>N<sub>17</sub>O<sub>19</sub>P<sub>3</sub><sup>-</sup>: 1416.4487;

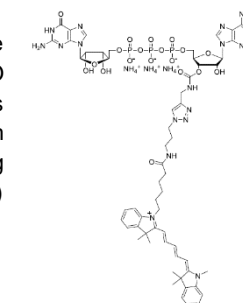**2'-O/3'-O-Py-Gp<sub>3</sub>A (7)**

2'-O/3'-O-cp-Gp<sub>3</sub>A (**2**) ammonium salt (0.5 mg, 0.55 μmol) was mixed with pyrene azide (**Py**) (1.5 mg, 3.6 μmol, 0.07 M) in 50 μL of DMSO following by addition of aqueous solutions of CuSO<sub>4</sub>·5H<sub>2</sub>O (0.75 mg, 3.0 μmol, 3.0 μL, 1.0 M) and sodium ascorbate (1.2 mg, 6.0 μmol, 6.0 μL, 1.0 M). The reaction was carried out at a room temperature for 20 h and stopped by addition of aqueous Na<sub>2</sub>EDTA (7.4 mg, 20 μmol) in 0.7 mL of H<sub>2</sub>O. The precipitated pyrene dye remains were centrifuged. The reaction product was purified using semipreparative RP HPLC (Method P5). The collected eluate was lyophilized repeatedly to afford 0.82 mg (0.16 μmol) of **7** as a white solid. HPLC yield: 92%. Yield after purification: 28%.

HRMS (-)ESI *m/z* found: 1268.2759, calc. for C<sub>48</sub>H<sub>53</sub>N<sub>15</sub>O<sub>21</sub>P<sub>3</sub><sup>-</sup>: 1268.2759.

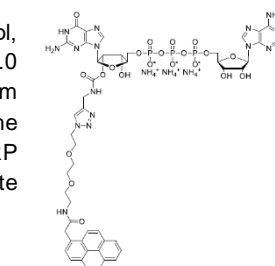

## SUPPORTING INFORMATION

**Gp<sub>3</sub>A(N6)-Py (8)**

Gp<sub>3</sub>A(N6)prop (**3**) ammonium salt (1.5 mg, 1.8 μmol, 0.058 M) was mixed with pyrene azide (**Py**) (1.2 mg, 2.9 μmol, 0.096 M) in 30 μL of DMSO following by addition of aqueous solutions of CuSO<sub>4</sub>·5H<sub>2</sub>O (0.38 mg, 1.5 μmol, 1.5 μL, 1.0 M) and sodium ascorbate (0.6 mg, 3.0 μmol, 3.0 μL, 1.0 M). The reaction was carried out at a room temperature for 48 h and stopped by addition of aqueous Na<sub>2</sub>EDTA (7.4 mg, 20 μmol) in 0.7 mL of H<sub>2</sub>O. The precipitated pyrene dye remains were centrifuged. The reaction product was purified using semipreparative RP HPLC (Method P5). The collected eluate was lyophilized repeatedly to afford 0.82 mg (0.64 μmol) of **8** as a white solid. HPLC yield: 96%. Yield after purification: 37%. HRMS (-)ESI *m/z* found: 1225.2700, calc. for C<sub>47</sub>H<sub>52</sub>N<sub>14</sub>O<sub>20</sub>P<sub>3</sub><sup>-</sup>: 1225.2701.

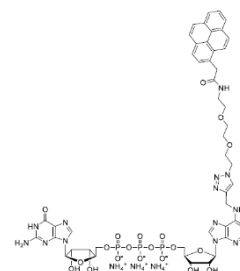**Gp<sub>3</sub>G(N1)-Py (9)**

Gp<sub>3</sub>G(N1)prop (**4**) triethylammonium salt (1.7mg, 1.9 μmol, 0.043 M) was mixed with pyrene azide (**Py**) (1.8 mg, 4.3 μmol, 0.096 M) in 45 μL of DMSO following by addition of aqueous solutions of CuSO<sub>4</sub>·5H<sub>2</sub>O (0.38 mg, 1.5 μmol, 1.5 μL, 1.0 M) and sodium ascorbate (0.6 mg, 3.0 μmol, 3.0 μL, 1.0 M). The reaction was carried out at a room temperature for 48 h and stopped by addition of aqueous Na<sub>2</sub>EDTA (7.4 mg, 20 μmol) in 0.7 mL of H<sub>2</sub>O. The precipitated pyrene dye remains were centrifuged. The reaction product was purified using semipreparative RP HPLC (Method P5). The collected eluate was lyophilized repeatedly to afford 1.05 mg (0.82 μmol) of **9** as a white solid. HPLC yield: 92%. Yield after purification: 42%. HRMS (-)ESI *m/z* found: 1241.2653, calc. for C<sub>47</sub>H<sub>52</sub>N<sub>14</sub>O<sub>21</sub>P<sub>3</sub><sup>-</sup>: 1241.2650.

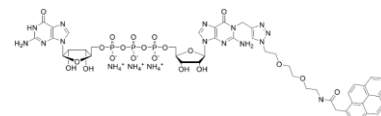**m<sup>7</sup>Gp<sub>3</sub>A-3'-O-Py (10a)**

Aqueous solution of m<sup>7</sup>Gp<sub>3</sub>A-3'-O-cp (**5**) ammonium salt (0.5 mg, 0.54 μmol, 10 μL, 0.54 M) was mixed with pyrene azide (**Py**) (2.0 mg, 4.8 μmol, 0.069 M) in 70 μL of DMSO following by addition of aqueous solutions of CuSO<sub>4</sub>·5H<sub>2</sub>O (0.75 mg, 3.0 μmol, 3.0 μL, 1.0 M) and sodium ascorbate (1.2 mg, 6.0 μmol, 6.0 μL, 1.0 M). The reaction was carried out at a room temperature for 4.5 h and stopped by addition of aqueous Na<sub>2</sub>EDTA (5.6 mg, 15 μmol) in 0.95 mL of H<sub>2</sub>O. The precipitated pyrene dye remains were centrifuged. The reaction product was purified using semipreparative RP HPLC (Method P6). The collected eluate was lyophilized repeatedly to afford 0.48 mg (0.31 μmol) of **10a** as a white solid. HPLC yield: 65%. Yield after purification: 43%. HRMS (-)ESI *m/z* found: 1282.2929, calc. for C<sub>49</sub>H<sub>55</sub>N<sub>15</sub>O<sub>21</sub>P<sub>3</sub><sup>-</sup>: 1282.2915.

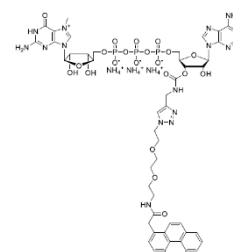**m<sup>7</sup>Gp<sub>3</sub>A-3'-O-Py3 (10b)**

m<sup>7</sup>Gp<sub>3</sub>A-3'-O-cp (**5**) ammonium salt (0.3 mg, 0.36 μmol, 0.007 M) was mixed with pyrene 3 azide (**Py3**) (0.63 mg, 1.4 μmol, 0.028 M) in 50 μL of DMSO following by addition of aqueous solutions of CuSO<sub>4</sub>·5H<sub>2</sub>O (0.75 mg, 3.0 μmol, 3.0 μL, 1.0 M) and sodium ascorbate (1.2 mg, 6.0 μmol, 6.0 μL, 1.0 M). The reaction was carried out at a room temperature for 3 h and stopped by addition of aqueous Na<sub>2</sub>EDTA (7.4 mg, 20 μmol) in 0.7 mL of H<sub>2</sub>O. The precipitated pyrene dye remains were centrifuged. The reaction product was purified using semipreparative RP HPLC (Method P5). The collected eluate was lyophilized repeatedly to afford 0.2 mg (0.15 μmol) of **10b** as a white solid. HPLC yield: 88%. Yield after purification: 41%. HRMS (-)ESI *m/z* found: 1311.3257, calc. for C<sub>52</sub>H<sub>61</sub>N<sub>15</sub>O<sub>20</sub>P<sub>3</sub><sup>-</sup>: 1311.3301.

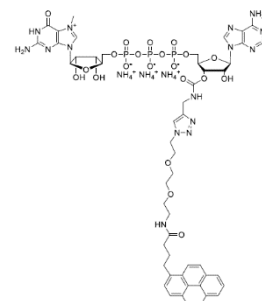

## Synthesis of potential inhibitors

**P1-5'-(C8-methyl)guanosine-P3-3'-adenosine triphosphate ammonium salt (8-Me-Gp<sub>3</sub>A)**

Triethylammonium salt of 8-Me-GMP (5.7 mg, 11.9 μmol) was mixed with sodium salt of ADP-Im (20.9 mg, 40.0 μmol) and ZnCl<sub>2</sub> (15.7 mg, 115 μmol) in DMF (0.1 mL). The reaction was carried out at 35 °C for 24 h and stopped by addition of Na<sub>2</sub>EDTA (44 mg, 118 μmol) dissolved in 1 mL of H<sub>2</sub>O and NaHCO<sub>3</sub> to pH 7. The reaction product was purified using semipreparative RP HPLC (Method P1). The collected eluate was lyophilized repeatedly to afford 1.9 mg (2.3 μmol) of 8-Me-Gp<sub>3</sub>A as a white solid. HPLC yield: 89%. Yield after purification: 19%. HRMS (-)ESI *m/z* found: 785.0860, calc. for C<sub>21</sub>H<sub>28</sub>N<sub>10</sub>O<sub>17</sub>P<sub>3</sub><sup>-</sup>: 785.0852. <sup>1</sup>H NMR (500 MHz, D<sub>2</sub>O): 8.47 (1H, s, H<sub>C2</sub>-Ado), 8.24 (1H, s, H<sub>C8</sub>-Ado), 6.03 (1H, d, *J* = 5.4 Hz, H<sub>1</sub>-Ado), 5.74 (1H, d, *J* = 6.8 Hz, H<sub>1</sub>-Guo), 5.08 (1H, dd, *J*<sub>1</sub> = 5.5 Hz, *J*<sub>2</sub> = 6.8 Hz, H<sub>2</sub>-Guo), 4.66 (1H, t, *J* = 5.4 Hz, H<sub>2</sub>-Ado), 4.55 (1H, dd, *J*<sub>1</sub> = 3.9 Hz, *J*<sub>2</sub> = 4.9 Hz, H<sub>3</sub>-Guos), 4.52 (1H, dd, *J*<sub>1</sub> = 3.9 Hz, *J*<sub>2</sub> = 4.9 Hz), 4.37 (1H, m), 4.34-4.22 (5H, m), 2.49 (3H, s, H<sub>methyl</sub>(C8)), <sup>31</sup>P NMR (202 MHz, D<sub>2</sub>O): -10.48 (2P, d, *J* = 18.8 Hz, P<sub>α</sub>, P<sub>γ</sub>), -22.25 (1P, t, *J* = 18.8 Hz, P<sub>β</sub>).

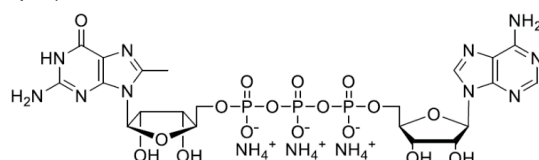

## SUPPORTING INFORMATION

***P1-5'-(C8-phenyl)guanosine-P3-3'-adenosine triphosphate ammonium salt (8-Ph-Gp<sub>3</sub>A)***

Triethylammonium salt of 8-Ph-GMP (5 mg, 9.3 μmol) was mixed with sodium salt of ADP-Im (10.5 mg, 20.1 μmol) and mixture of ZnCl<sub>2</sub> (18 mg, 132 μmol) and MgCl<sub>2</sub> (10 mg, 105 μmol) in DMSO (0.1 mL) and DMF (0.1 mL). The reaction was carried out at a room temperature for 22 h and stopped by addition of Na<sub>2</sub>EDTA (56 mg, 150 μmol) in 0.8 mL of H<sub>2</sub>O. The pH was adjusted to 7.0 by addition of NaHCO<sub>3</sub>. The reaction product was purified using semipreparative RP HPLC (Method P7). The collected eluate was lyophilized repeatedly to afford 2.6 mg (2.8 μmol) of 8-Ph-Gp<sub>3</sub>A as a white solid. HPLC yield: 93%. Yield after purification: 31%. HRMS (-)ESI *m/z* found: 847.1025, calc. for C<sub>26</sub>H<sub>30</sub>N<sub>10</sub>O<sub>17</sub>P<sub>3</sub><sup>-</sup>: 847.1009; <sup>1</sup>H NMR (500 MHz, D<sub>2</sub>O): 8.47 (1H, s, H<sub>C2</sub>-Ado), 8.14 (1H, s, H<sub>C8</sub>-Ado), 7.59 (5H, s, H<sub>phenyl (C8)</sub>), 5.98 (1H, d, *J* = 5.6 Hz, H<sub>1</sub>-Ado), 5.60 (1H, d, *J* = 6.2 Hz, H<sub>1</sub>-Guo), 5.31 (1H, t, *J* = 6.2 Hz, H<sub>2</sub>-Guo), 4.63 (1H, t, *J* = 5.6 Hz, H<sub>2</sub>-Ado), 4.51 (2H, m), 4.36 (1H, m), 4.30 (3H, m), 4.24 (1H, m), 4.21 (1H, m), <sup>31</sup>P NMR (202 MHz, D<sub>2</sub>O): -10.40 (2P, m, P<sub>α</sub>, P<sub>γ</sub>), -22.17 (1P, t, *J* = 19.2 Hz, P<sub>β</sub>).

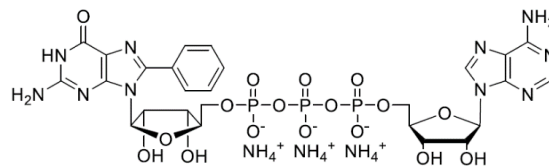***P1-5'-(6-thio)guanosine-P3-3'-adenosine triphosphate ammonium salt (6-<sup>S</sup>Gp<sub>3</sub>A)***

Triethylammonium salt of <sup>6-S</sup>GMP (7.0 mg, 14.6 μmol) was mixed with sodium salt of ADP-Im (15.4 mg, 29.5 μmol) and ZnCl<sub>2</sub> (24.2 mg, 178 μmol) in DMF (0.25 mL). The reaction was carried out at 35 °C for 4 h and stopped by addition of Na<sub>2</sub>EDTA (70 mg, 188 μmol) dissolved in 2 mL of H<sub>2</sub>O and NaHCO<sub>3</sub> to pH 7. The reaction product was purified using semipreparative RP HPLC (Method P1). The collected eluate was lyophilized repeatedly to afford 8.0 mg (8.9 μmol) of <sup>6-S</sup>Gp<sub>3</sub>A as a white solid. HPLC yield: 70%. Yield after purification: 61%. HRMS (-)ESI *m/z* found: 787.0475, calc. for C<sub>20</sub>H<sub>26</sub>N<sub>10</sub>O<sub>16</sub>P<sub>3</sub>S<sup>-</sup>: 787.0467. <sup>1</sup>H NMR (500 MHz, D<sub>2</sub>O): 8.32 (1H, s, H<sub>C2</sub>-Ado), 8.16 (1H, s, H<sub>C8</sub>-Ado or H<sub>C8</sub>-Guo), 8.15 (1H, s, H<sub>C8</sub>-Ado or H<sub>C8</sub>-Guo), 6.04 (1H, d, *J* = 4.5 Hz, H<sub>1</sub>-Ado), 5.80 (1H, d, *J* = 5.2 Hz, H<sub>1</sub>-Guo), 4.67 (1H, t, *J* = 5.2 Hz, H<sub>2</sub>-Guo), 4.65 (1H, t, *J* = 4.5, H<sub>2</sub>-Ado), 4.49 (2H, m), 4.35 (1H, m), 4.31 (3H, m), 4.27 (2H, m), <sup>31</sup>P NMR (202 MHz, D<sub>2</sub>O): -10.54 (2P, d, *J* = 18.9 Hz, P<sub>α</sub>, P<sub>γ</sub>), -22.04 (1P, t, *J* = 18.9 Hz, P<sub>β</sub>).

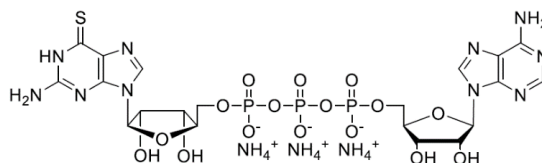***(6-thio)guanosine-diphosphate ammonium salt (6-<sup>S</sup>GDP)***

Triethylammonium salt of <sup>6-S</sup>GMP (7.0 mg, 14.6 μmol) was mixed with triethylammonium salt of PO<sub>4</sub><sup>3-</sup> (14.0 mg, 35.2 μmol) and ZnCl<sub>2</sub> (30.0 mg, 220 μmol) in DMF (0.32 mL). The reaction was carried out at 35 °C for 24 h and stopped by addition of Na<sub>2</sub>EDTA (85 mg, 228 μmol) dissolved in 5 mL of H<sub>2</sub>O and NaHCO<sub>3</sub> to pH 7. The reaction product was purified using semipreparative RP HPLC (Method P1). The collected eluate was lyophilized repeatedly to afford 1.5 mg (1.2 μmol) of <sup>6-S</sup>GDP as a white solid. HPLC yield: 56%. Yield after purification: 21%. HRMS (-)ESI *m/z* found: 457.9946, calc. for C<sub>10</sub>H<sub>14</sub>N<sub>5</sub>O<sub>10</sub>P<sub>2</sub>S<sup>-</sup>: 457.9942. <sup>1</sup>H NMR (500 MHz, D<sub>2</sub>O): 8.29 (1H, s, H<sub>C8</sub>), 5.94 (1H, d, *J* = 5.7 Hz, H<sub>1</sub>), 4.81 (1H, m, H<sub>2</sub>), 4.58 (1H, dd, *J*<sub>1</sub> = 5.0 Hz, *J*<sub>2</sub> = 3.9 Hz, H<sub>3</sub>), 4.35 (1H, m, H<sub>4</sub>), 4.22 (2H, dd, *J*<sub>1</sub> = 3.4 Hz, *J*<sub>2</sub> = 5.3 Hz, H<sub>5,5'</sub>), <sup>31</sup>P NMR (202 MHz, D<sub>2</sub>O): -8.22 (1P, m, P<sub>β</sub>), -10.01 (1P, d, *J* = 19.8 Hz, P<sub>α</sub>).

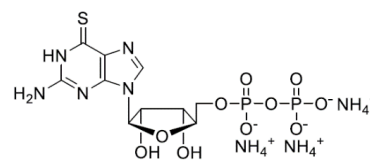**Ecm1 and RNMT-RAM Expression and Purification**

Methyltransferase gene from *E. Cuniculi* called Ecm1 cloned in pEX-K4 cloning vector (purchased from Eurofins) was amplified by PCR using primers that introduced BamHI and HindIII restriction sites compatible with the cloning sites of pQE-30 expression vector. Inserted ECM1 gene was flanked at the 5' end by a sequence that encoded His-tag and Sumo-tag. Ecm1 methyltransferase (MTase) was overexpressed as a fusion protein with His-tagged Sumo in the pLysS (DE3) *E. coli* strain (Stratagene). 6xHis-Sumo-Ecm1 expression was induced with 0.3 mM IPTG at an optical density of 0.8, and the cells were further cultured for 16 h at 18 °C. The cells were lysed in buffer containing 50 mM Tris-HCl (pH 8.0), 100 mM NaCl, 5% glycerol, 5 mM β-mercaptoethanol (2-ME), 10 mM imidazole, 1 mg/mL lysozyme with addition of a mixture of protease inhibitors. After 30 min, the NaCl concentration was increased to 500 mM. The lysate was sonicated, centrifuged and clarified by filtration. The cleared lysate was then loaded on a 5 mL HisTrap Crude column (GE Healthcare) previously equilibrated with a buffer containing 50 mM Tris-HCl (pH 8.0), 500 mM NaCl, 10 mM imidazole, 5% glycerol and 5 mM 2-ME. 6xHis-Sumo-Ecm1 was eluted with buffer containing 300 mM imidazole. For removal of N-terminal tag, His6\_Ulp1 Sumo protease (MCLAB) was added to pooled fractions containing 6x-His-SUMO-Ecm1. The mixture was dialyzed at 4 °C overnight against a buffer containing 50 mM Tris-HCl (pH 8.0), 500 mM NaCl, 5% glycerol, 0.5 mM EDTA, 0.5 mM DTT and 10 mM imidazole. The dialyzed sample was loaded on the HisTrap Crude column previously equilibrated with dialysis buffer. Flow-through was collected as a fraction containing Ecm1 MTase separated from N-terminal tag (6xHis-Sumo) and His-tagged Sumo protease. The flow-through fraction was further polished on a Superdex 75 Prep Grade HiLoad 26/600 gel filtration column (GE Healthcare). Fractions containing Ecm1 MTase were concentrated to 10.5 μM, flash-frozen and stored at -80 °C in a buffer containing 30 mM Tris-HCl (pH 8.0), 200 mM NaCl, 5% glycerol, 0.5 mM EDTA and 0.5 mM DTT.

Human N7-methyltransferase RNMT in complex with RAM subunit was expressed and purified as described previously.<sup>[6]</sup>

## SUPPORTING INFORMATION

## UV-Vis and Fluorescence Measurements

**Absorption and Fluorescence Measurements.** Absorption spectra were measured in 50 mM Tris-HCl, pH 7.5, on a Shimadzu UV-1800 spectrophotometer, with a CPS-100 holder for temperature control, using a quartz 10 × 2 mm cuvette. Emission and excitation spectra were measured in 50 mM Tris-HCl, pH 7.5, on a Cary Eclipse spectrofluorometer (Agilent), equipped with a xenon lamp, under temperature-controlled conditions at 30 °C using a quartz 10 × 4 mm cuvette. Before each measurement, the buffer was degassed. Emission spectra were recorded for all excitation maxima, and excitation spectra were recorded for all emission maxima.

**Quantum Yield (QY) Determination.** Relative QYs of all compounds were determined according to a previously reported procedure.<sup>[7]</sup> For all labeled nucleotides, the experiments were carried out in a 10 × 10 mm quartz cuvette in 50 mM Tris-HCl, pH 7.5, at 25 °C. QY values for pyrene-labeled nucleotides were determined at an excitation of 345 nm relative to quinine sulfate in 0.1 M H<sub>2</sub>SO<sub>4</sub> (QY = 54%).<sup>[8]</sup> QY of perylene-labeled GpppA was determined at an excitation of 435 nm relative to perylene-azide in ethanol (QY = 100%), according to the manufacturer (<https://www.lumiprobe.com/>). QYs of BDP-FL-labeled nucleotides were determined at an excitation of 475 nm relative to BDP-FL-azide in ethanol (QY = 97%), according to the manufacturer (<https://www.lumiprobe.com/>). QYs of 5-FAM-labeled nucleotides were determined at an excitation of 475 nm relative to fluorescein in 0.1 M NaOH (QY = 79%).<sup>[9]</sup> QY of cyanine 3 (Cy3)-labeled GpppA was determined at an excitation of 520 nm relative to Cy3-azide in ethanol (QY = 31%), according to the manufacturer (<https://www.lumiprobe.com/>). QY of cyanine 5 (Cy5)-labeled GpppA was determined at an excitation of 610 nm relative to Cy5-azide in ethanol (QY = 20%), according to the manufacturer (<https://www.lumiprobe.com/>). The same excitation wavelengths and slit widths were used for samples and references. To minimize the reabsorption effect, absorption of a sample at the excitation wavelength was kept under 0.1. For QY calculations the following formula was applied:

$$QY_{\text{sample}} = QY_{\text{ref}} \frac{S_{\text{sample}}}{S_{\text{ref}}} \frac{f_{\text{ref}}}{f_{\text{sample}}} \frac{\eta_{\text{sample}}^2}{\eta_{\text{ref}}^2}, \quad (1)$$

where  $S$  is the integral area under the fluorescence emission spectrum;  $\eta$  is the refractive index of the solvent; and  $f$  is the absorption factor defined as

$$f = 1 - 10^{-A(\lambda_{\text{exc}})}, \quad (2)$$

**Point Fluorescence Measurements.** All experiments involving monitoring of the enzymatic N7-MTase process were performed on a Synergy™ H1 plate reader in Greiner 96-well black, flat-bottom, non-binding plates. For all measurements with probe **6b** fluorescence detection at 345 nm excitation wavelength and 378 nm emission wavelength was registered. For other probes excitation and emission corresponded to its absorption and emission maxima.

## Monitoring of N7-MTase Activity

**Steady-State Parameter Determination.** Point fluorescence measurements were performed to determine kinetic parameters of enzymatic N7-methylation of probe **6b** by Ecm1 and RNMT-RAM. The experiments were performed in 96-well black, non-binding assay plates at 30 °C. Each well contained a substrate (0–15 μM probe **6b**), the SAM cosubstrate (50 μM for Ecm1 or 20 μM for RNMT-RAM), and a protein (10 nM Ecm1 or 20 nM RNMT-RAM) in 50 mM Tris-HCl, pH 7.5. Studies on N7-methylation of the SAM cosubstrate were carried out in 50 mM Tris-HCl, pH 7.5, with a substrate (2 μM probe **6b**), the SAM cosubstrate (0–100 μM), and a protein (10 nM Ecm1 and 20 nM RNMT-RAM) at 30 °C. The reaction components for both experiments were preincubated for 15 min at 30 °C with mixing at 300 rpm, and the enzyme solutions were prepared separately in the same buffer at a concentration up to 150 nM (Ecm1) and 300 nM (RNMT-RAM). Before adding an enzyme, the plate was additionally incubated in a plate reader for 20 min at 30 °C with mixing at 300 rpm and point fluorescence registered every minute. Immediately before fluorescence reading, 10 μL of an enzyme solution was added into each well to a total reaction volume of 150 μL. The initial rates were calculated by fitting a linear curve to the first 10 points (10 minutes) for Ecm1 or 20 points (20 minutes) for RNMT-RAM. We measured fluorescence intensity changes until complete signal saturation, thus being able to convert the initial rates from au/min to μM/min. To calculate kinetic parameters, the Michaelis–Menten model was applied. To obtain the relationship between the initial rate of the reaction and the substrate concentration, the following equation was fitted:

$$V = \frac{E_t k_{\text{cat}} [S]}{K_M + [S]}, \quad (3)$$

where  $K_M$  is the Michaelis-Menten constant;  $[S]$  is the concentration of probe **6b**;  $E_t$  is the enzyme concentration;  $k_{\text{cat}}$  is the catalytic constant; and  $V_{\text{max}}$  is the maximum rate, calculated as  $E_t k_{\text{cat}}$ . To determine  $K_M$ ,  $k_{\text{cat}}$ , and  $V_{\text{max}}$  we used the GraphPad Prism 7 software.

**Screening of the LOPAC<sup>®1280</sup> Library.** Screening of the LOPAC<sup>®1280</sup> library was performed using point fluorescence measurements in 96-well black, non-binding assay plates at 30 °C. Each well contained 50 mM Tris-HCl, pH 7.5, a substrate (2 μM probe **6b**), the SAM cosubstrate (50 μM), the Ecm1 enzyme (10 nM), an inhibitor (10 μM), and 3% of DMSO (compounds from LOPAC<sup>®1280</sup> library are dissolved in pure DMSO). The reaction components were preincubated for 15 min at 30 °C with mixing at 300 rpm. Before adding the enzyme, the plate was additionally incubated in a plate reader for 20 min at 30 °C with mixing at 300 rpm and point fluorescence registered every minute. Immediately before fluorescence reading, 10 μL of an enzyme solution was added into each well to a total reaction volume of 150 μL. Initial rates were calculated by fitting a linear curve to the first 10 points (10 minutes).



## SUPPORTING INFORMATION

*IC<sub>50</sub> Determination.* Inhibition parameters of enzymatic N7-methylation of probe **6b** by Ecm1, RNMT-RAM, and VCE were determined using point fluorescence measurements in 96-well black, non-binding assay plates at 30 °C. Each well contained 50 mM Tris-HCl, pH 7.5, a substrate (2 μM probe **6b**), the SAM cosubstrate (50 μM for Ecm1 and 20 μM for RNMT-RAM), an enzyme (10 nM Ecm1, 20 nM RNMT-RAM, or 5U of VCE), and an inhibitor (half-log dilutions  $\log C_{\text{inh}} \in \langle -2.5; 2 \rangle$  for nucleotide-like inhibitors or  $\log C_{\text{inh}} \in \langle -3; 1.5 \rangle$  for compounds from the LOPAC<sup>®1280</sup> library). During the experiment, point fluorescence (exc. 345 nm, em. 378 nm) was registered. If the inhibitor fluorescence interfered with the probe **6b** emission, a control measurement of the inhibitor solution was performed under the same conditions and then the result was subtracted from the inhibition data.

To determine IC<sub>50</sub> parameters, a four-parameter dose-response equation was fitted as follows:

$$\frac{V}{V_0} = A1 + \frac{A2 - A1}{1 + \frac{(C_{\text{inh}})^p}{(IC_{50})^p}}, \quad (4)$$

where A1 and A2 are the bottom and top asymptotes, respectively; C<sub>inh</sub>, the inhibitor concentration; p is the Hill coefficient, and V/V<sub>0</sub> is the ratio of the initial reaction rate with the inhibitor to that without the inhibitor.

### z-Factor Determination

To determine z-factor values of the Ecm1 and RNMT-RAM assays point fluorescence measurements were performed in 96-well black, non-binding assay plates at 30 °C. The plates included positive and negative controls in a 1:1 ratio. The positive controls consisted of a mixture of 50 mM Tris-HCl (pH 7.5), a substrate (2 μM probe **6b**), the SAM cosubstrate (50 μM for Ecm1 and 20 μM for RNMT-RAM), and an enzyme (10 nM Ecm1 or 20 nM RNMT-RAM). To the negative controls, sinefungin was added at a concentration causing complete reaction inhibition (25 μM for Ecm1 and 20 μM for RNMT-RAM). The reaction components were preincubated for 15 min at 30 °C with mixing at 300 rpm. Before adding an enzyme, the plate was additionally incubated in a plate reader for 20 min at 30 °C with mixing at 300 rpm and point fluorescence was registered every minute. Immediately before fluorescence reading, 10 μL of an enzyme solution was added into each well to a total reaction volume of 150 μL. The initial rates were calculated by fitting a linear curve to the first 10 points (10 minutes) for Ecm1 or 20 points (20 minutes) for RNMT-RAM. Finally, z-factor values were calculated as follows:

$$z = 1 - \frac{3 * (\sigma_{\text{pos}} + \sigma_{\text{neg}})}{|\mu_{\text{pos}} - \mu_{\text{neg}}|}, \quad (5)$$

where σ is the standard deviation, and μ is the average value of the initial rate for the positive (pos) and negative (neg) controls, respectively.

## SUPPORTING INFORMATION

## Author Contributions

R.K., J.K., and J.J. designed the study; R.K. synthesized fluorescent probes and performed the experiments; M.F. synthesized C8- and 6S-modified nucleotides and participated in fluorescence measurements; A.M. synthesized C8-modified monophosphate precursors; P.W. synthesized *P*-imidazolide of (N6-propargil)-2'/3'-carbamoyladenine di- and monophosphate; M.S. provided Ecm1; M.K. synthesized compound 4; V.H.C. provided RNMT-RAM. R.K., J.K., and J.J. wrote the first draft of the manuscript. All authors contributed to the writing of the manuscript and approved the final version of the manuscript.

## Supporting References

- [1] P. Wanat, S. Walczak, B. Wojtczak, M. Nowakowska, J. Jemielity, J. Kowalska, *Organic Letters* **2015**, *17*, 3062-3065.
- [2] M. Kocial, B. A. Wojtczak, R. Kasprzyk, J. Kowalska, J. Jemielity, *Molecules* **2019**, *24*; P. Wanat, R. Kasprzyk, M. Kocial, P. J. Sikorski, D. Strzelecka, J. Jemielity, J. Kowalska, *Chem Commun (Camb)* **2018**, *54*, 9773-9776; M. Warminski, J. Kowalska, J. Jemielity, *Org Lett* **2017**, *19*, 3624-3627; H. Jiang, J. Congleton, Q. Liu, P. Merchant, F. Malavasi, H. C. Lee, Q. Hao, A. Yen, H. Lin, *J Am Chem Soc* **2009**, *131*, 1658-1659.
- [3] J. V. Silverton, W. Limn, H. T. Miles, *J Am Chem Soc* **1982**, *104*, 1081-1087.
- [4] M. Chromiński, M. R. Baranowski, S. Chmielinski, J. Kowalska, J. Jemielity, *J Org Chem* **2020**.
- [5] M. Nowakowska, J. Kowalska, F. Martin, A. d'Orchymont, J. Zuberek, M. Lukaszewicz, E. Darzynkiewicz, J. Jemielity, *Org Biomol Chem* **2014**, *12*, 4841-4847.
- [6] D. Varshney, A. P. Petit, J. A. Bueren-Calabuig, C. Jansen, D. A. Fletcher, M. Peggie, S. Weidlich, P. Scullion, A. V. Pislakov, V. H. Cowling, *Nucleic Acids Res* **2016**, *44*, 10423-10436.
- [7] C. Wurth, M. Grabolle, J. Pauli, M. Spieles, U. Resch-Genger, *Nature Protocols* **2013**, *8*, 1535-1550.
- [8] A. N. Fletcher, *J Mol Spectrosc.* **1967**, *23*, 221-224.
- [9] R. E. Kellogg, R. G. Bennett, *J Chem Phys* **1964**, *41*, 3042-3045.

## SUPPORTING INFORMATION

## HPLC profiles, HR MS and NMR spectra

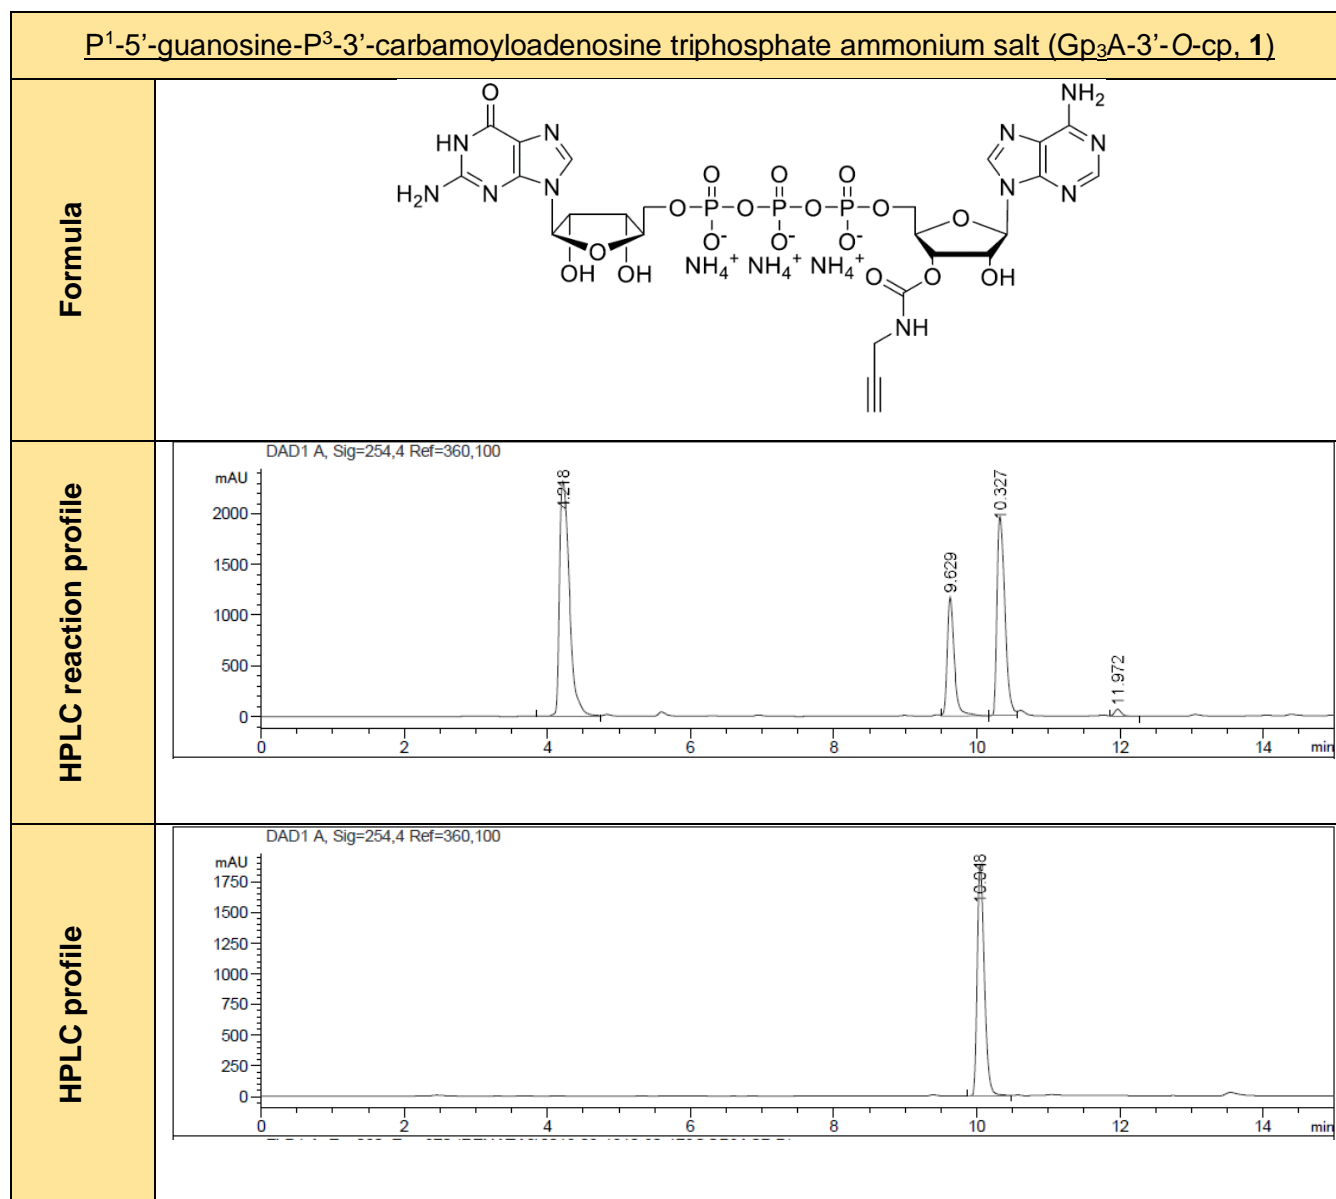

## SUPPORTING INFORMATION

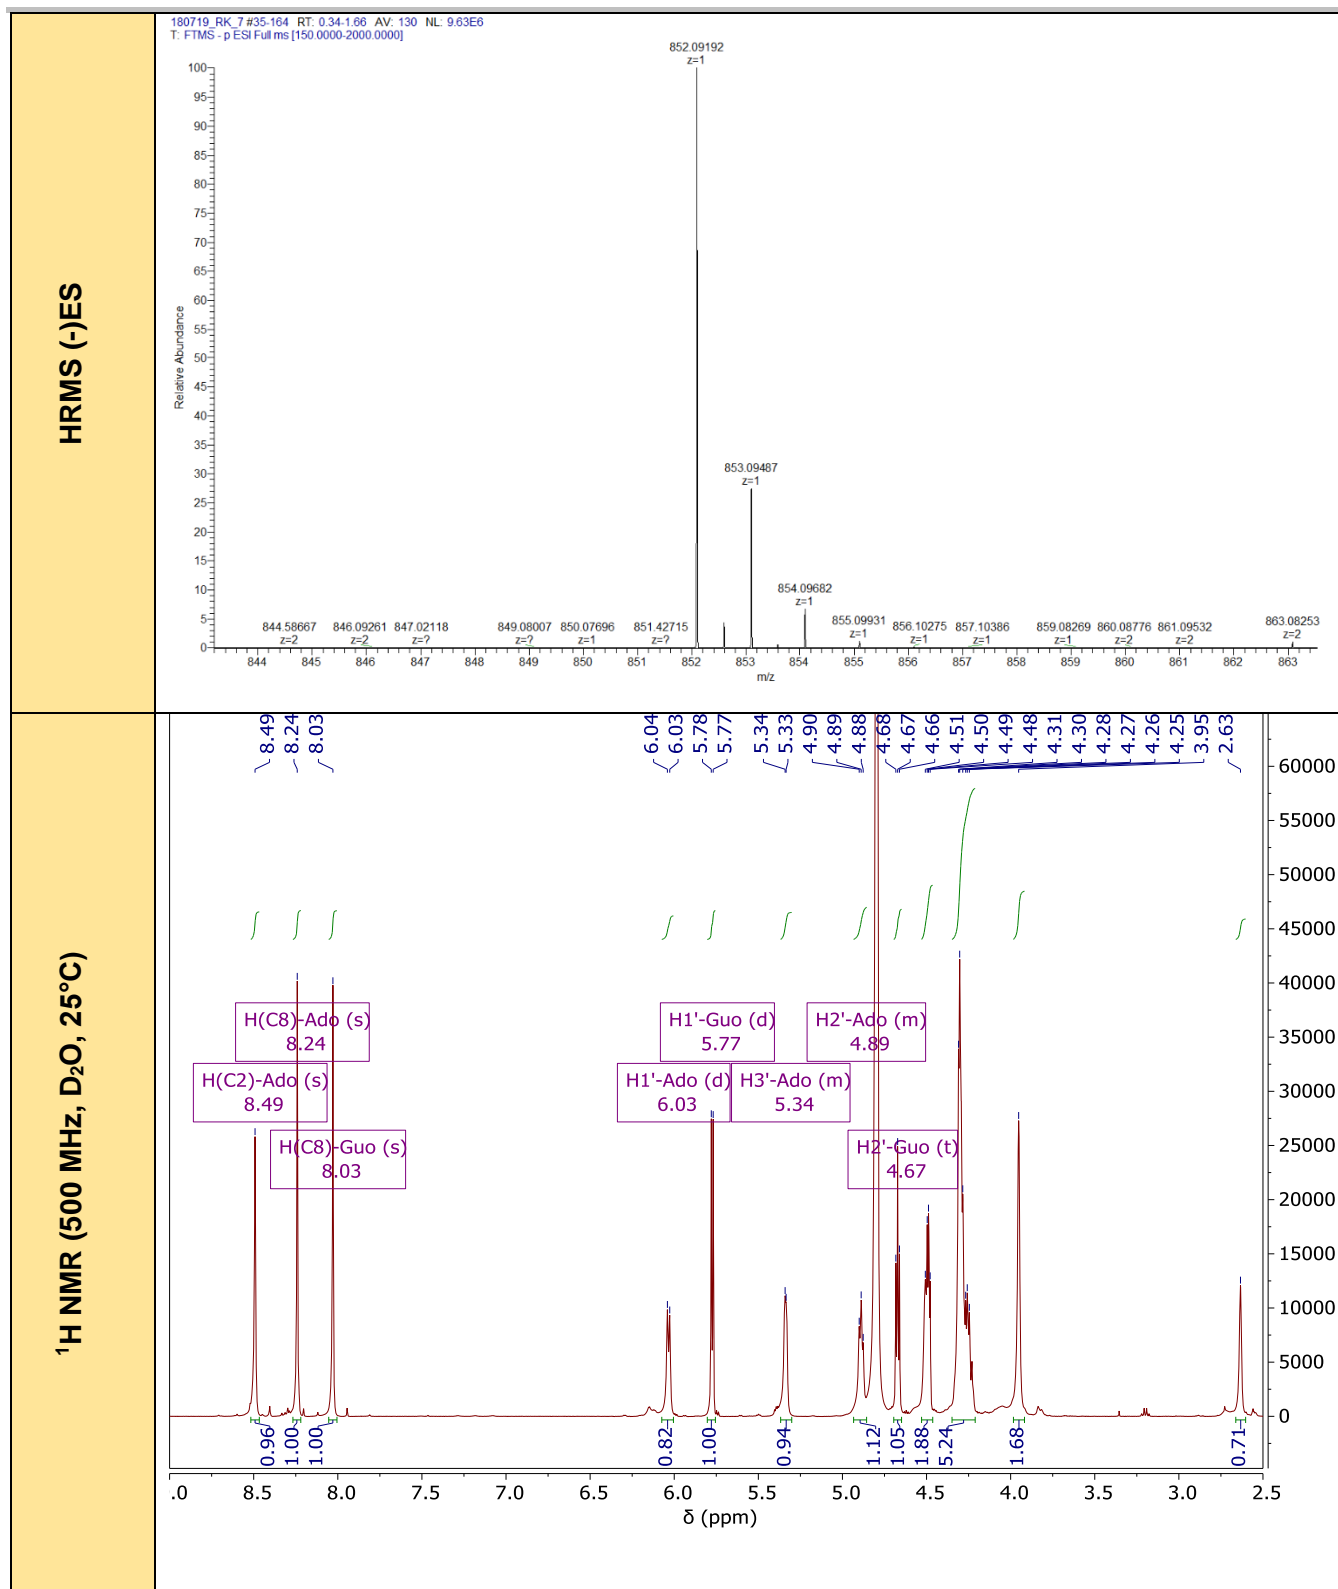



## SUPPORTING INFORMATION

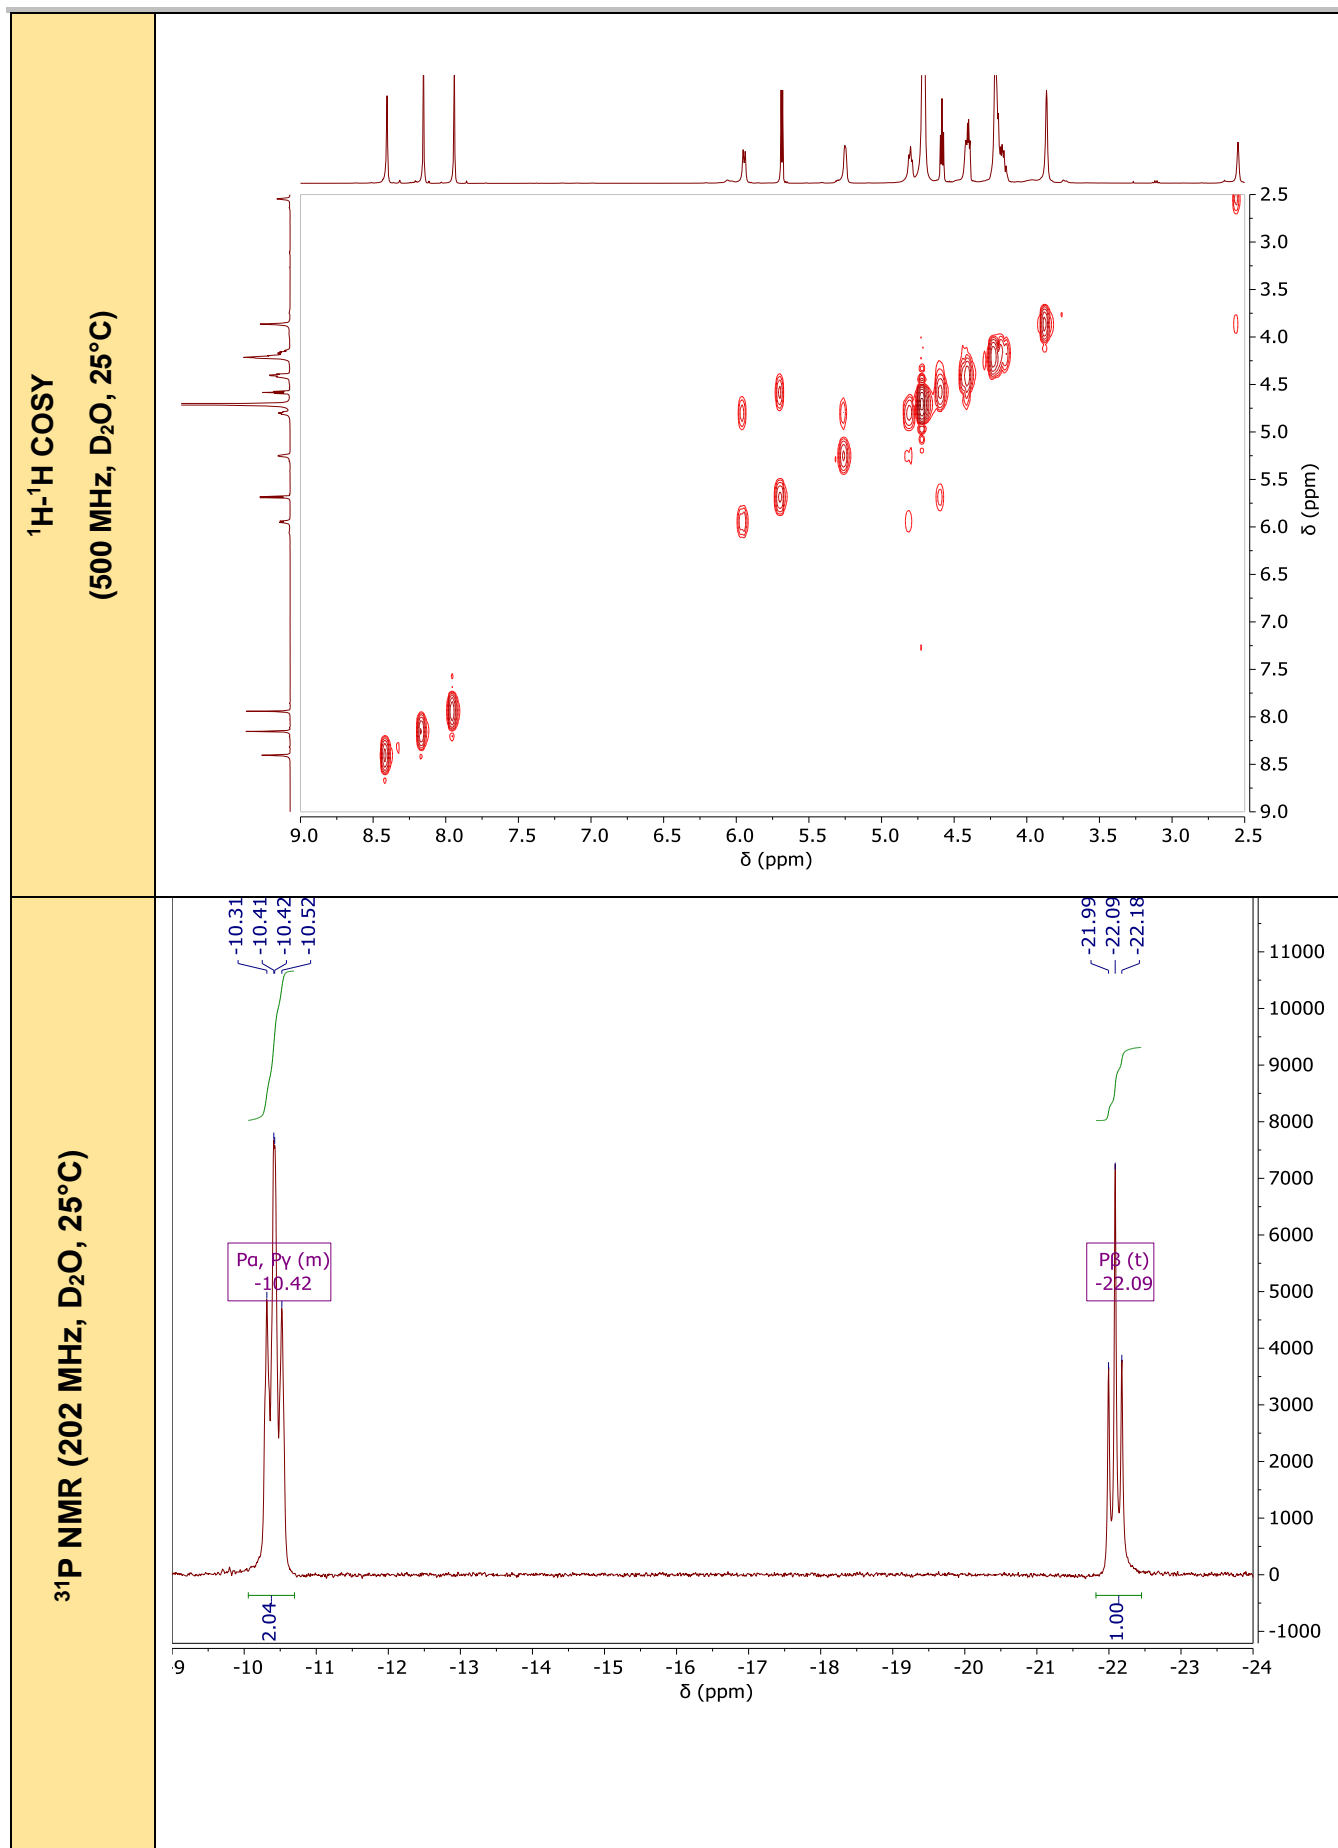

## SUPPORTING INFORMATION

**P<sup>1</sup>-5'-(2'(3)-carbamoylo)guanosine-P<sup>3</sup>-3'-adenosine triphosphate ammonium salt (2'-O/3'-O-cp-Gp<sub>3</sub>A, 2)****Formula**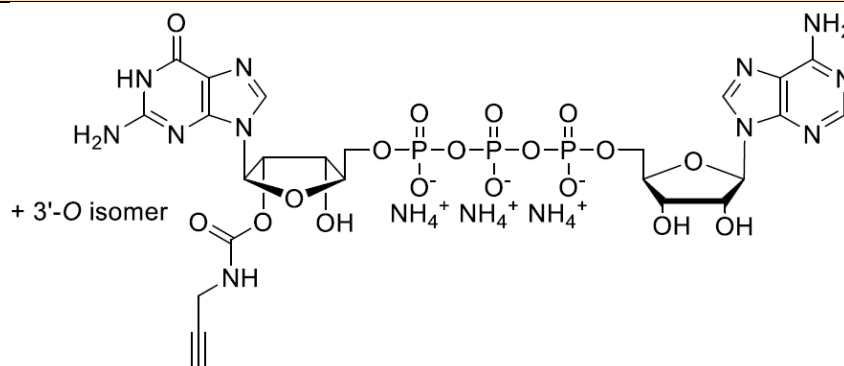**HPLC reaction profile**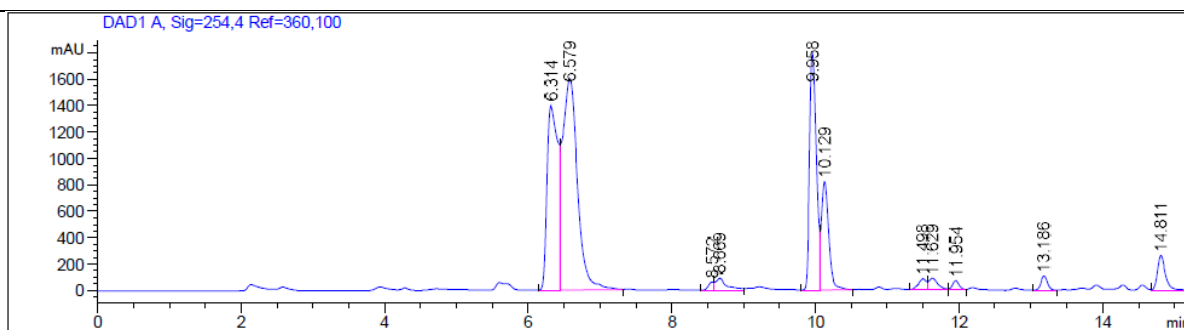**HPLC profile**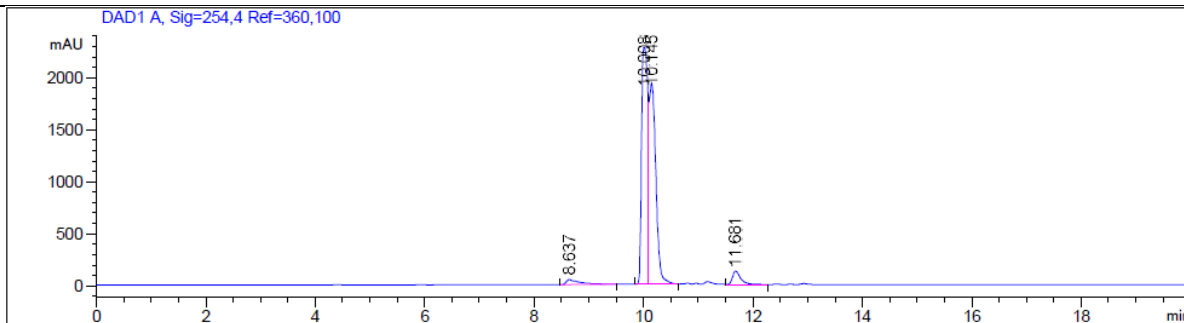

SUPPORTING INFORMATION

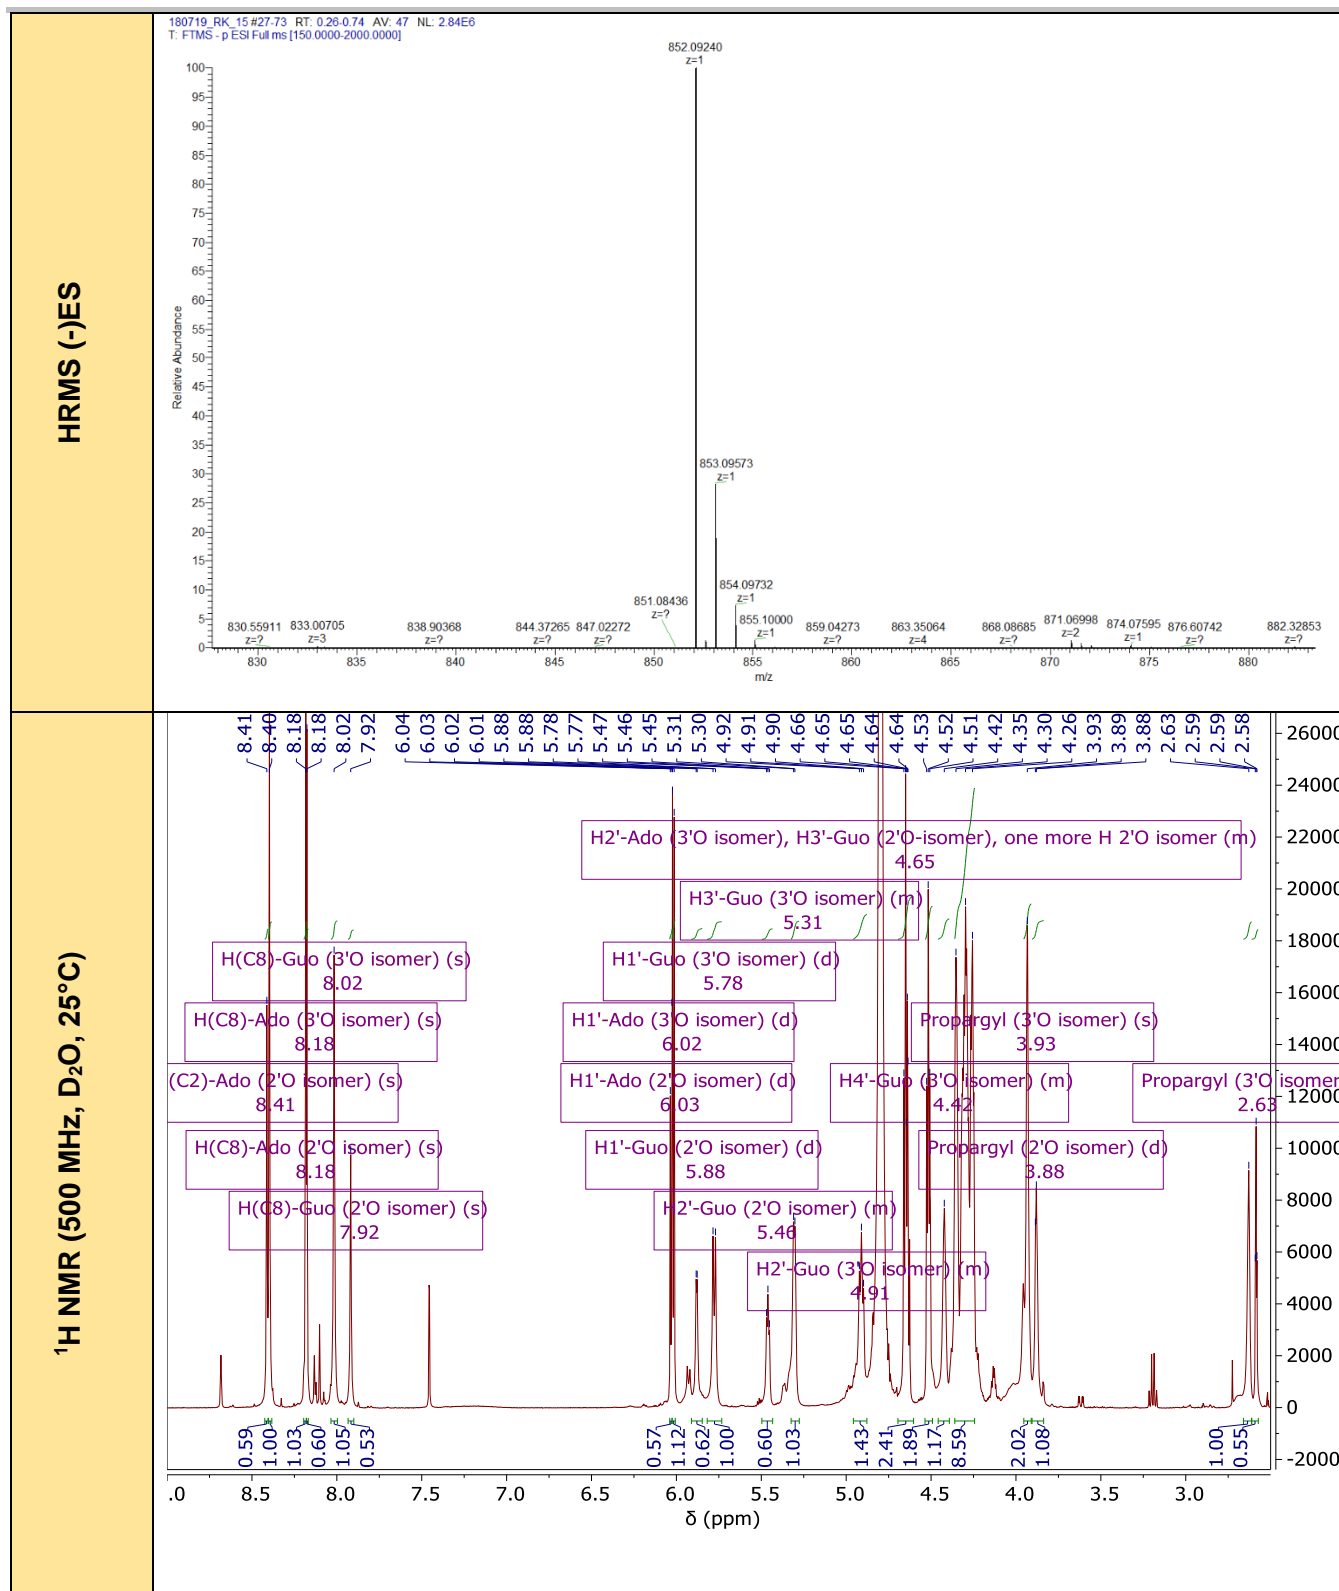

## SUPPORTING INFORMATION

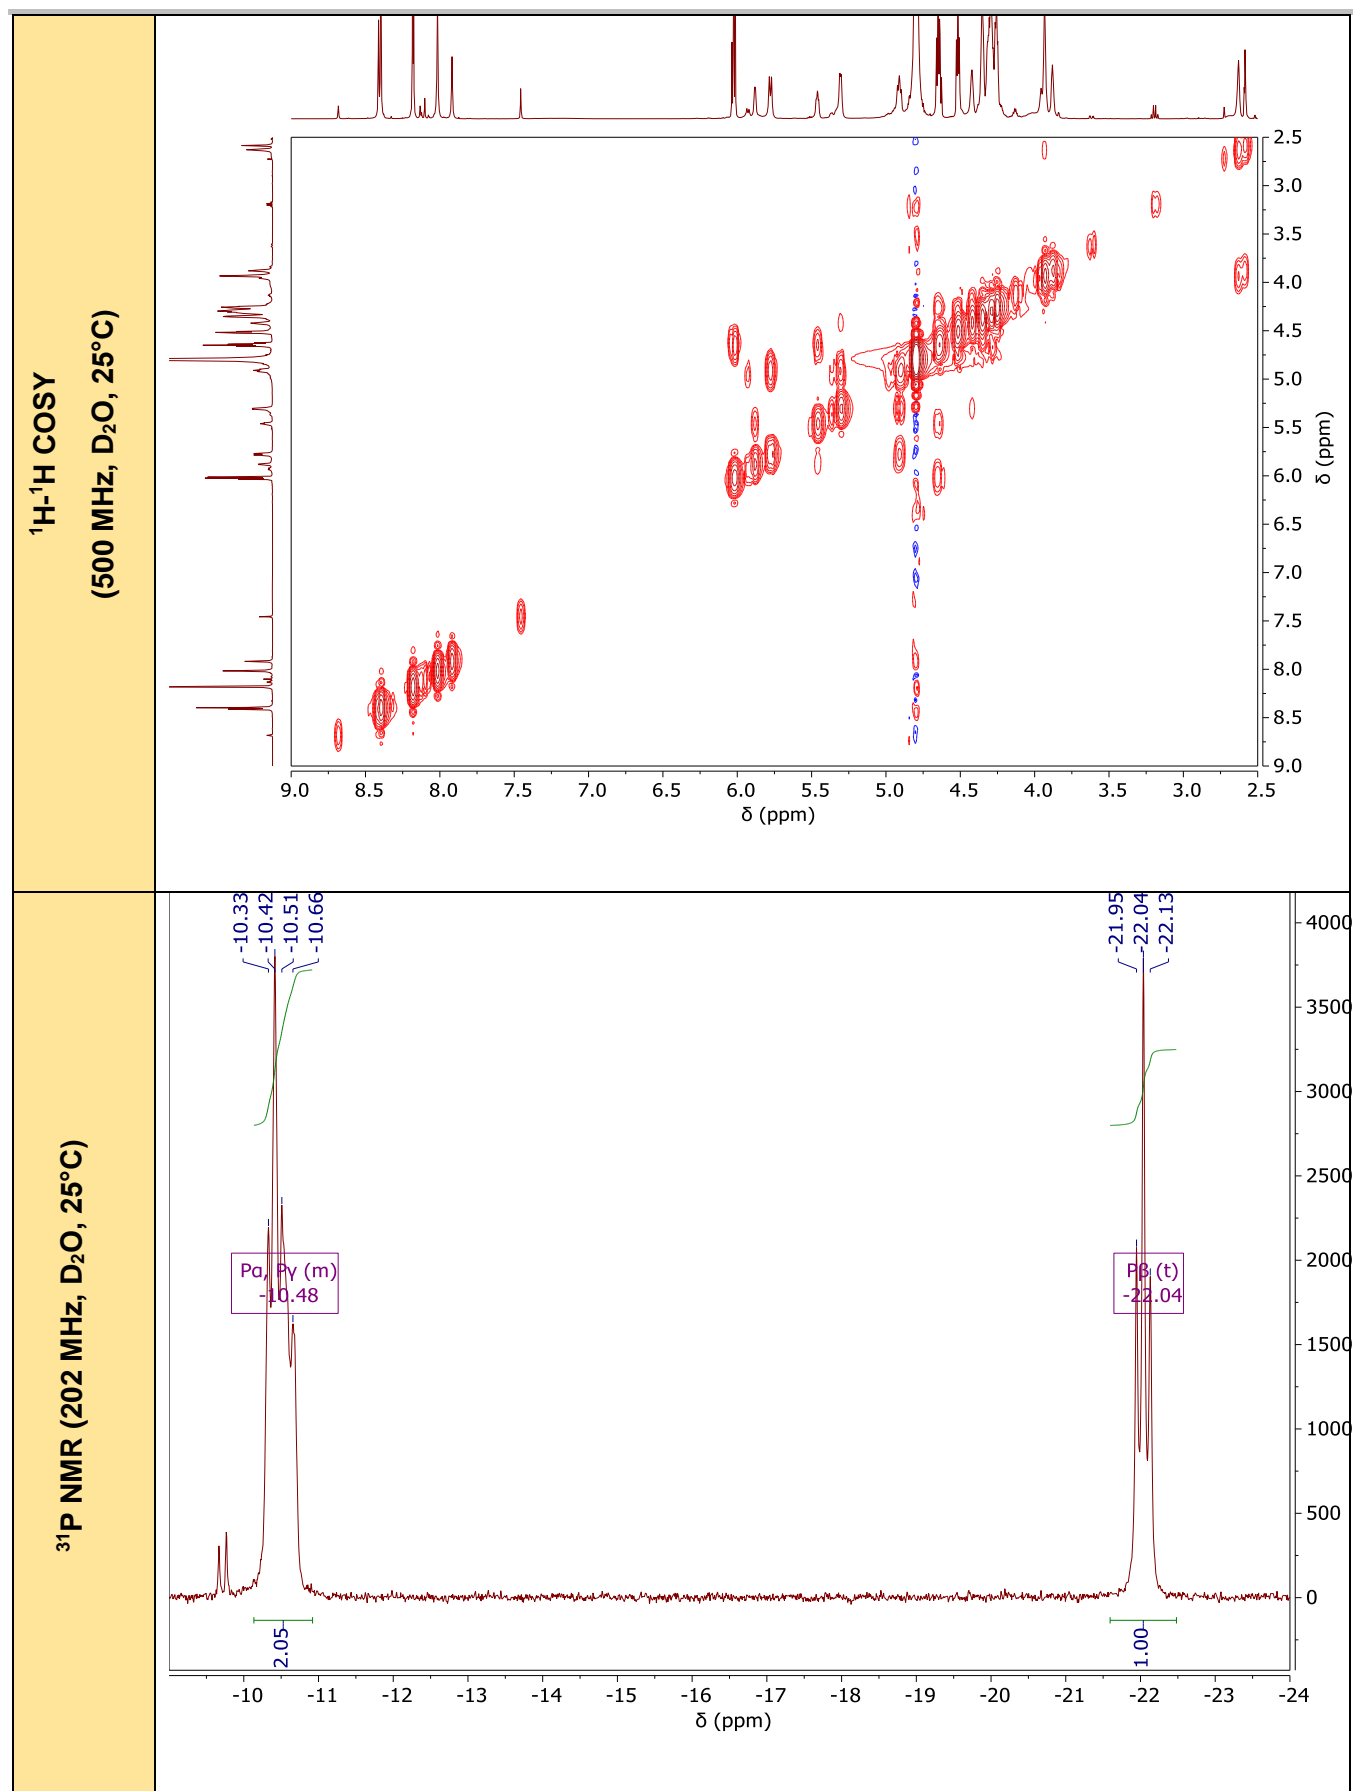

## SUPPORTING INFORMATION

P<sup>1</sup>-5'-guanosine-P<sup>3</sup>-3'-N6-propargyladenosine triphosphate ammonium salt (Gp<sub>3</sub>A(N6)prop, **3**)

Formula

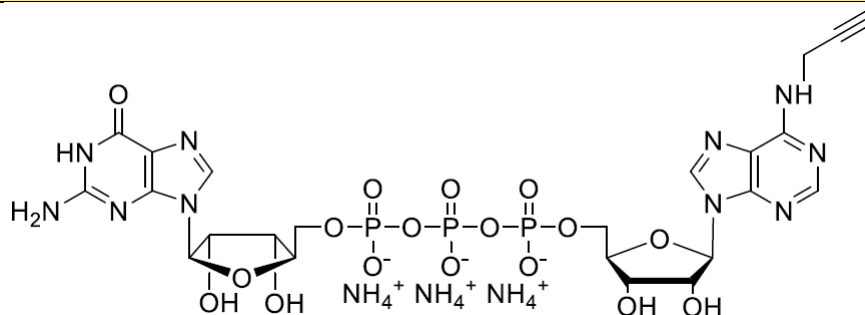

HPLC reaction profile

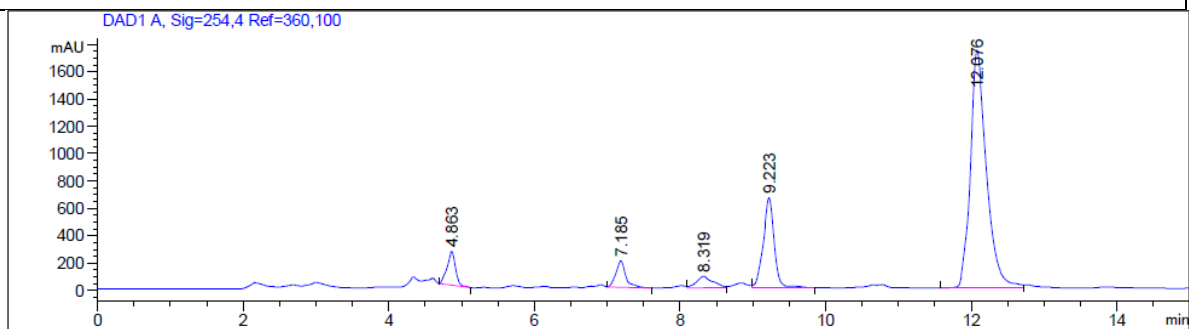

HPLC profile

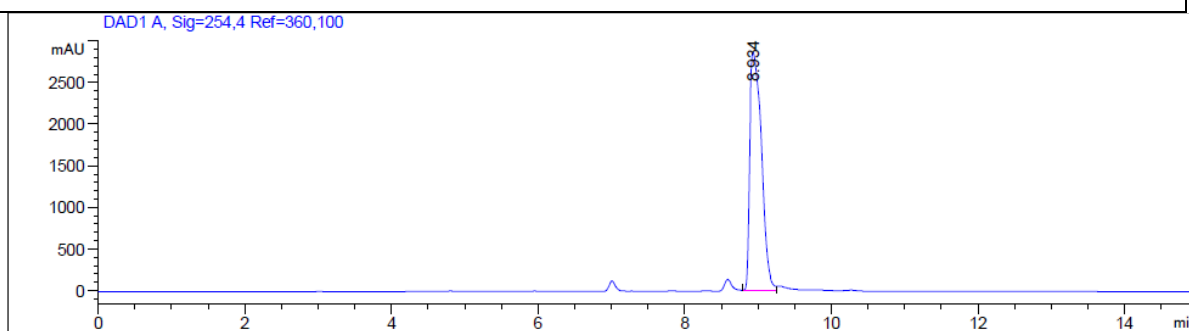

HRMS (-)ES

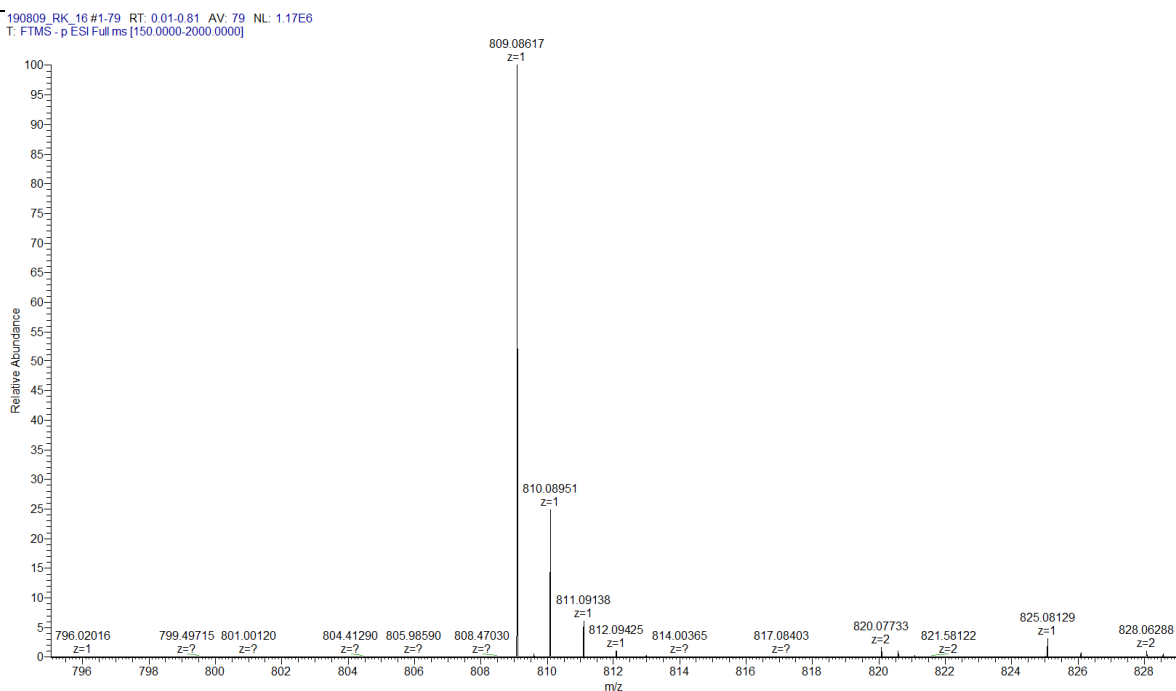

## SUPPORTING INFORMATION

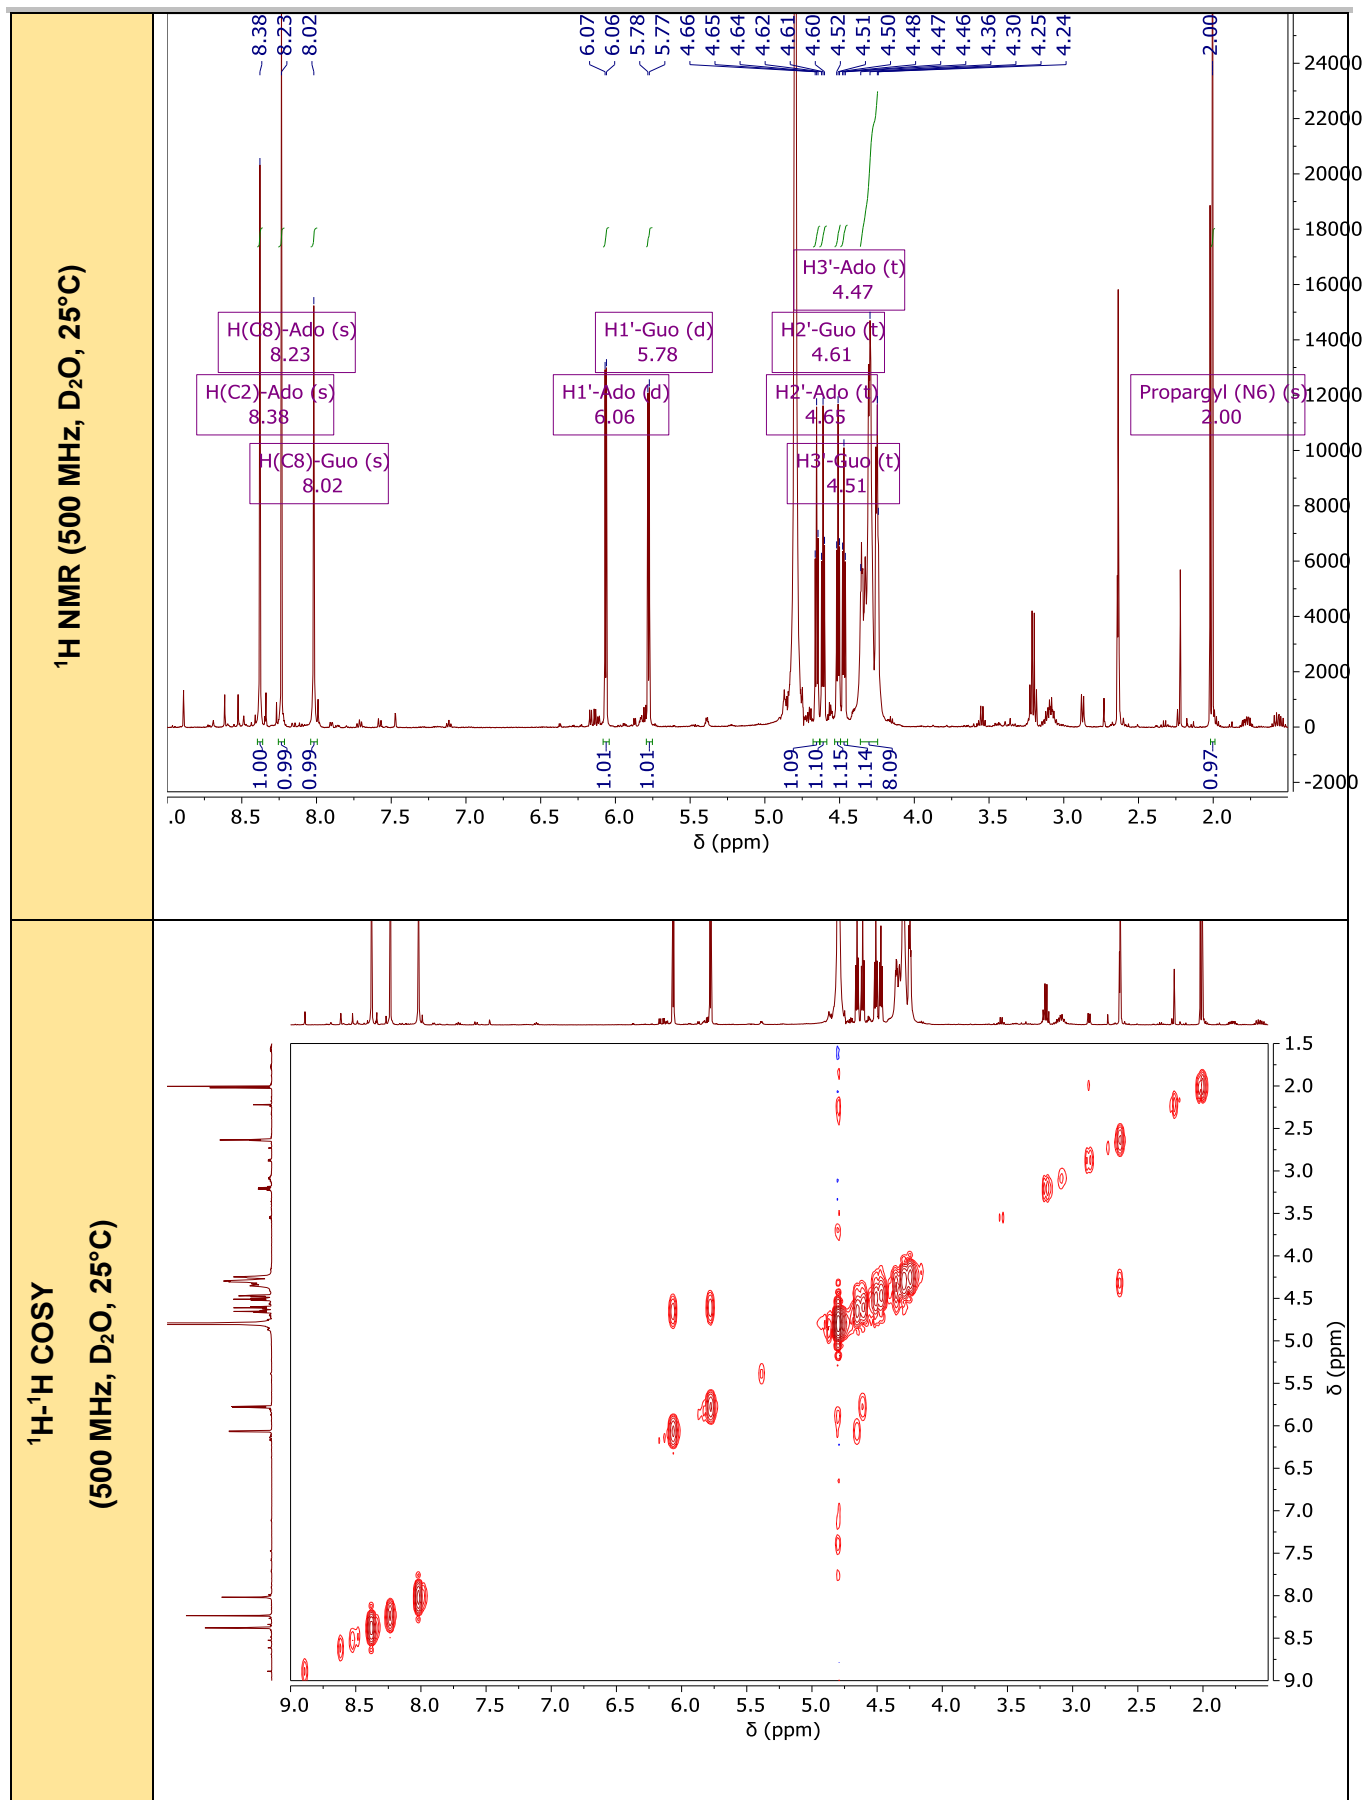

## SUPPORTING INFORMATION

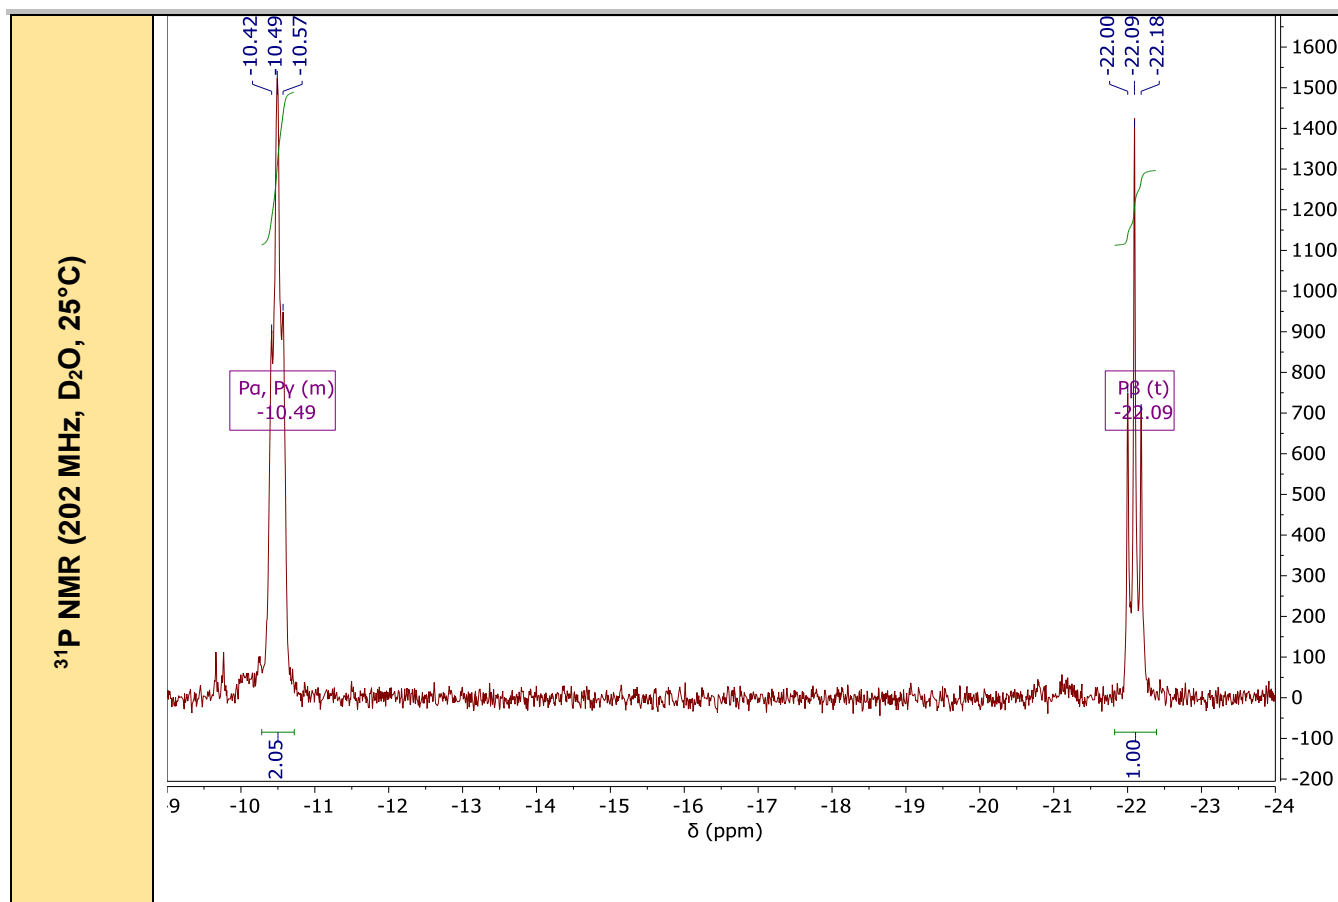

**P<sup>1</sup>-5'-guanosine-P<sup>3</sup>-3'-N1-propargylguanosine triphosphate ammonium salt (Gp<sub>3</sub>G(N1)prop, 4)**

**Formula**

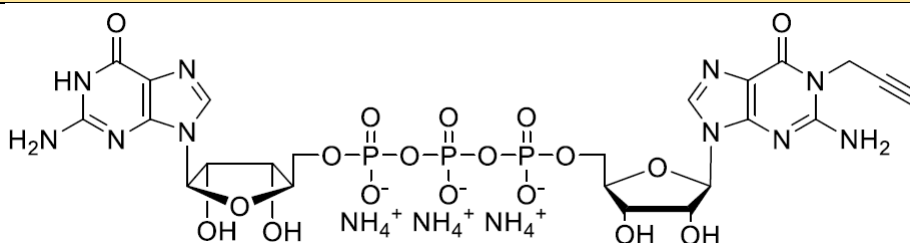

**HPLC reaction profile**

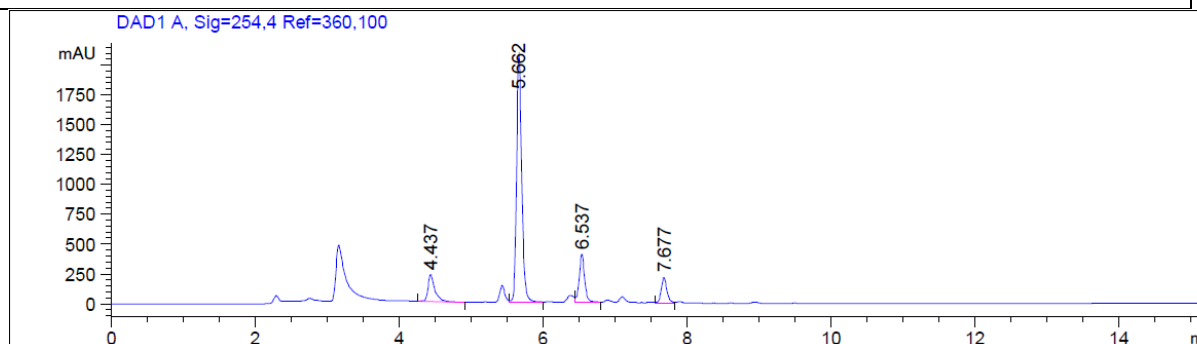

## SUPPORTING INFORMATION

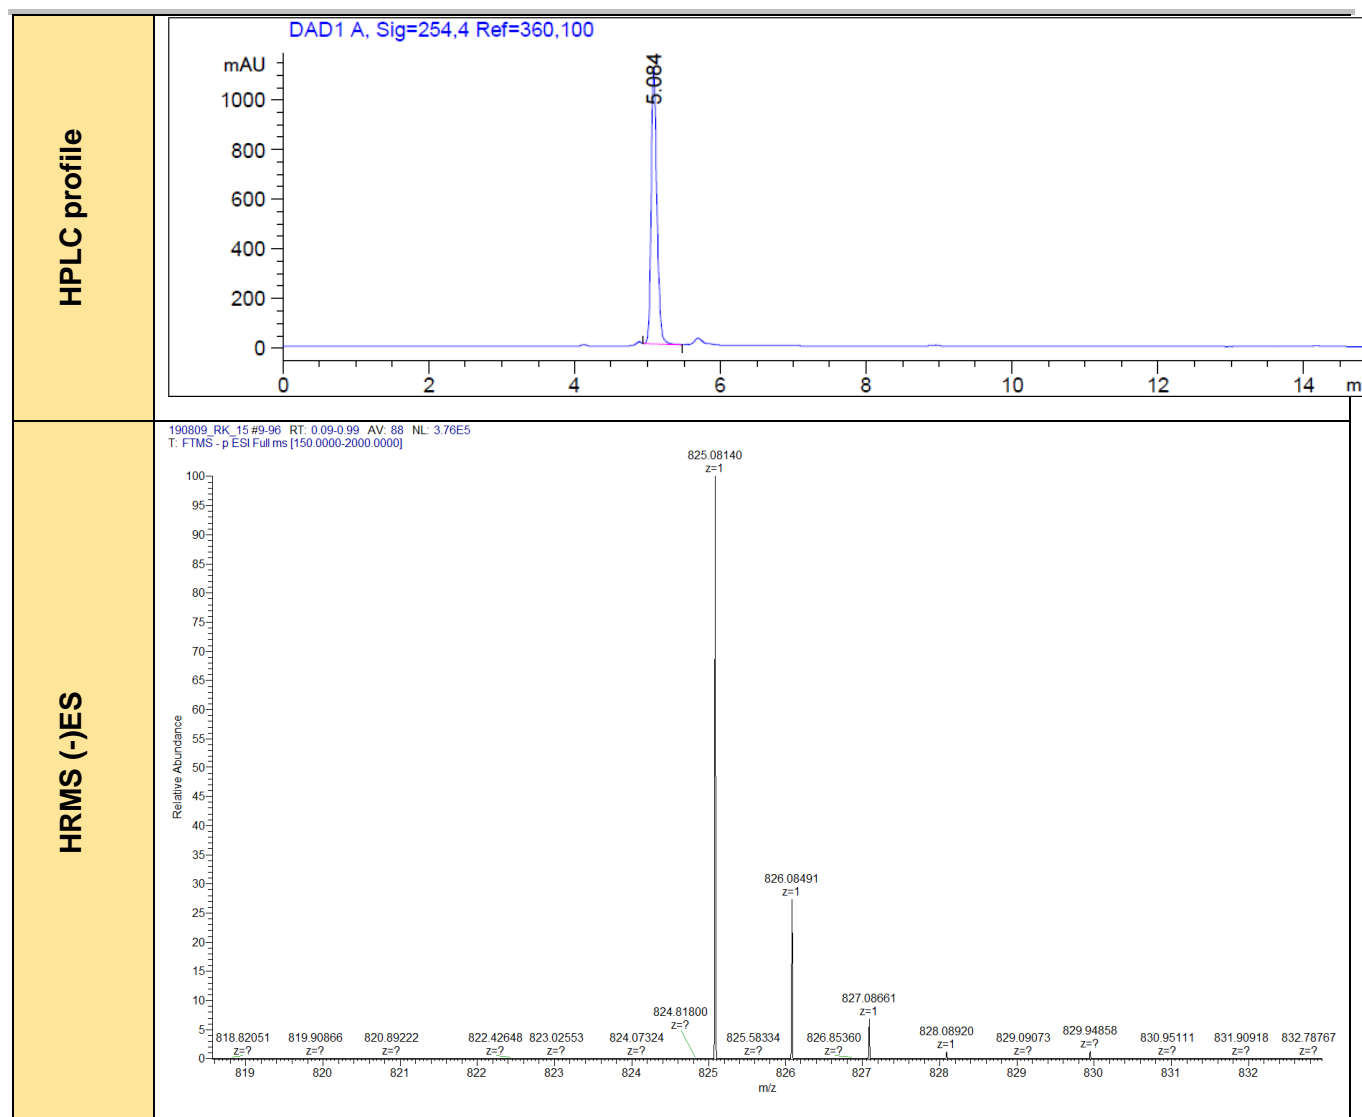



## SUPPORTING INFORMATION

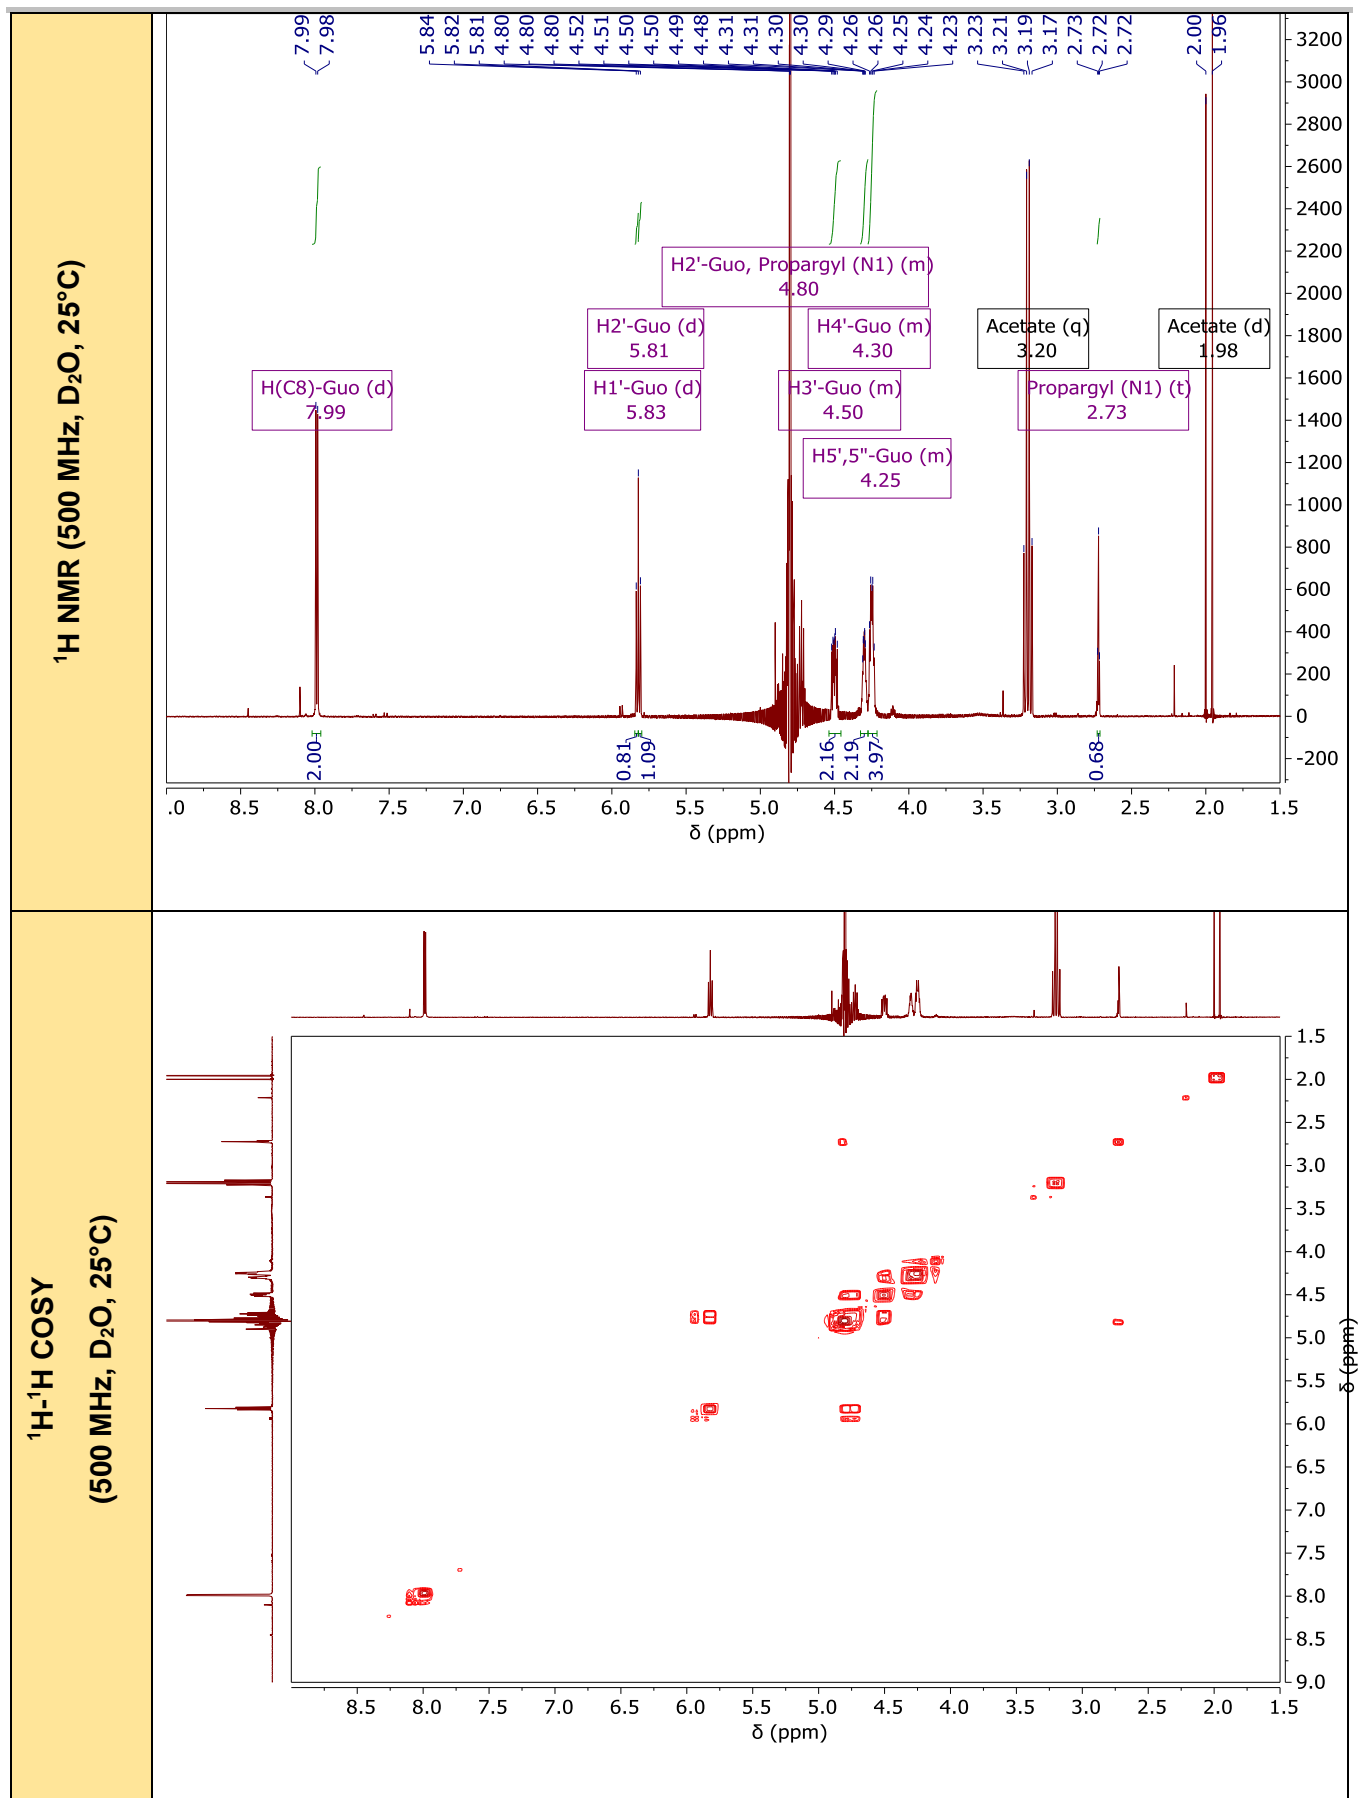

## SUPPORTING INFORMATION

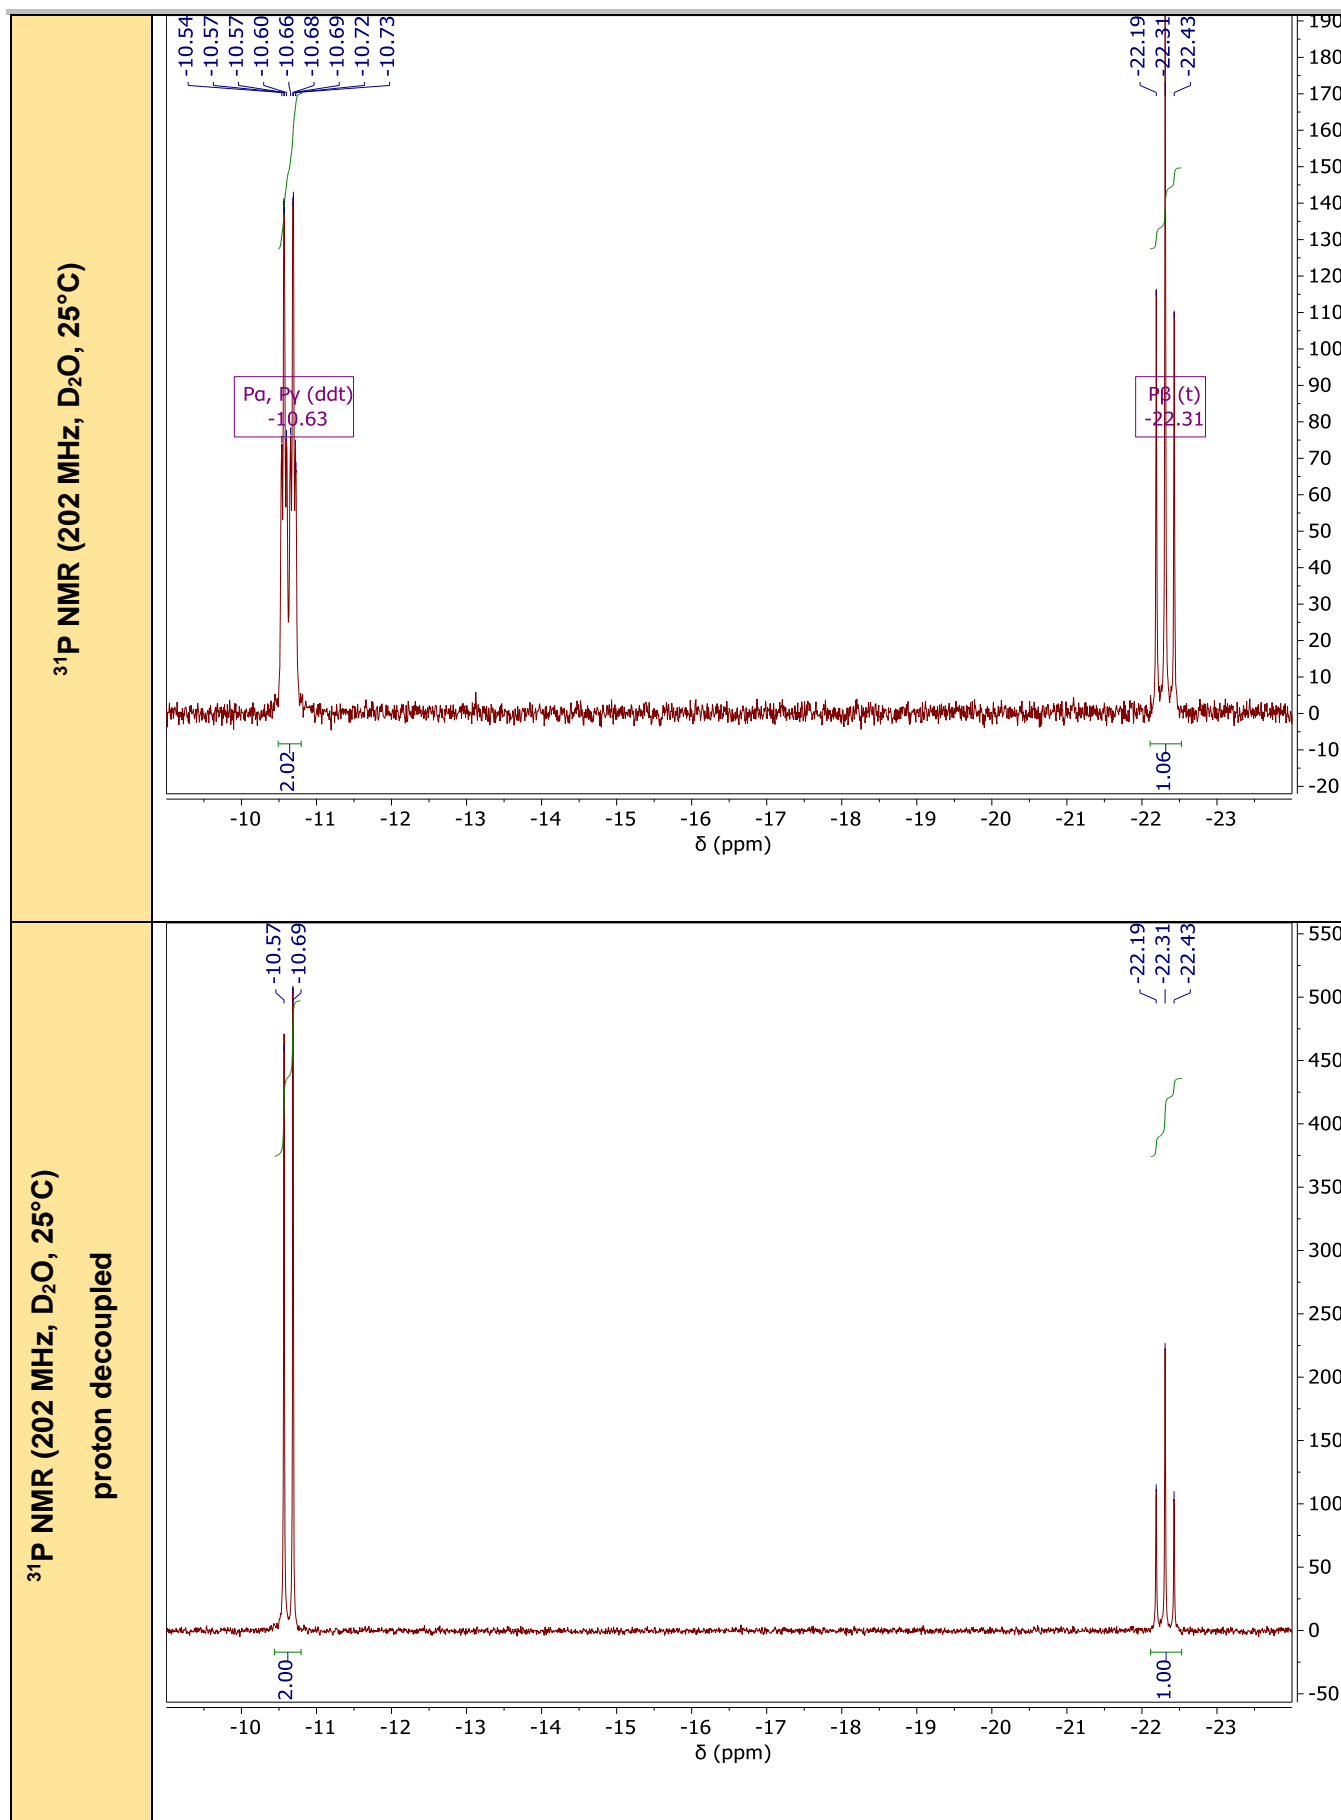

## SUPPORTING INFORMATION

P<sup>1</sup>-5'-(7-methyl)guanosine-P<sup>3</sup>-3'-carbamoyladenine triphosphate ammonium salt (m<sup>7</sup>Gp<sub>3</sub>A-3'-O-cp, **5**)

Formula

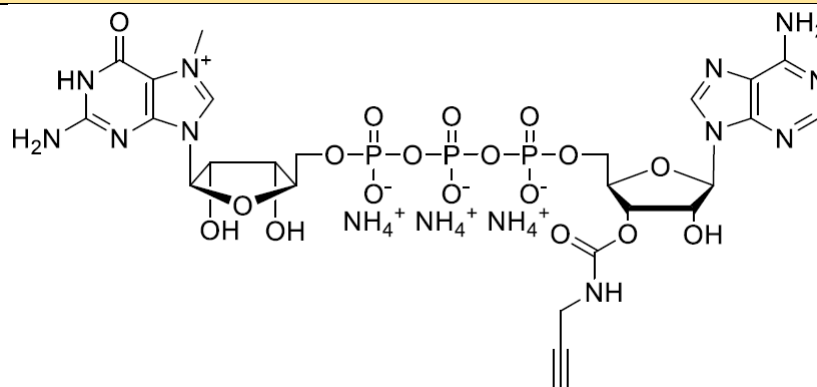

HPLC reaction profile

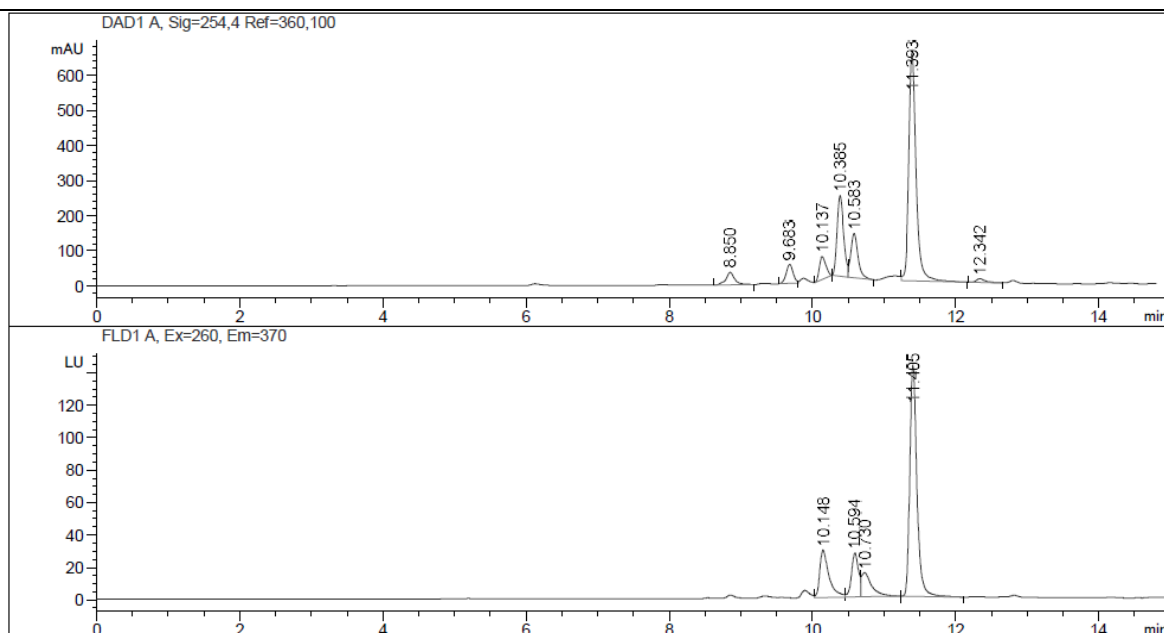

## SUPPORTING INFORMATION

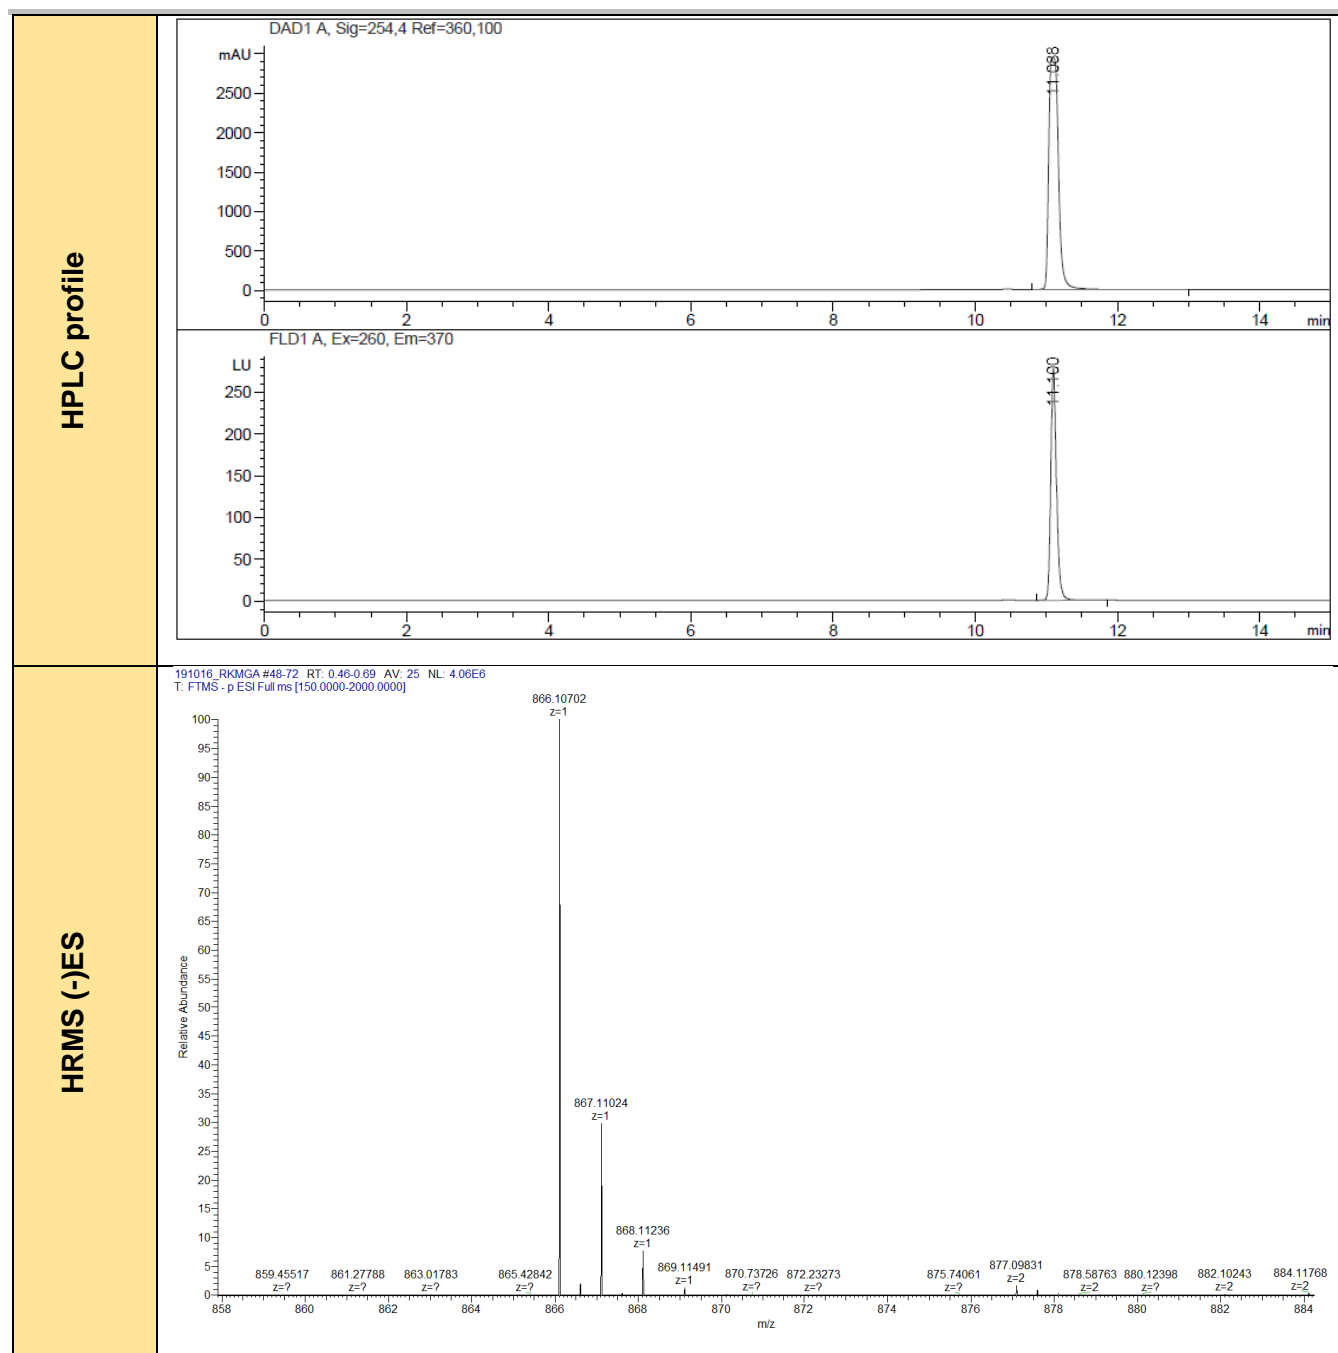

## SUPPORTING INFORMATION

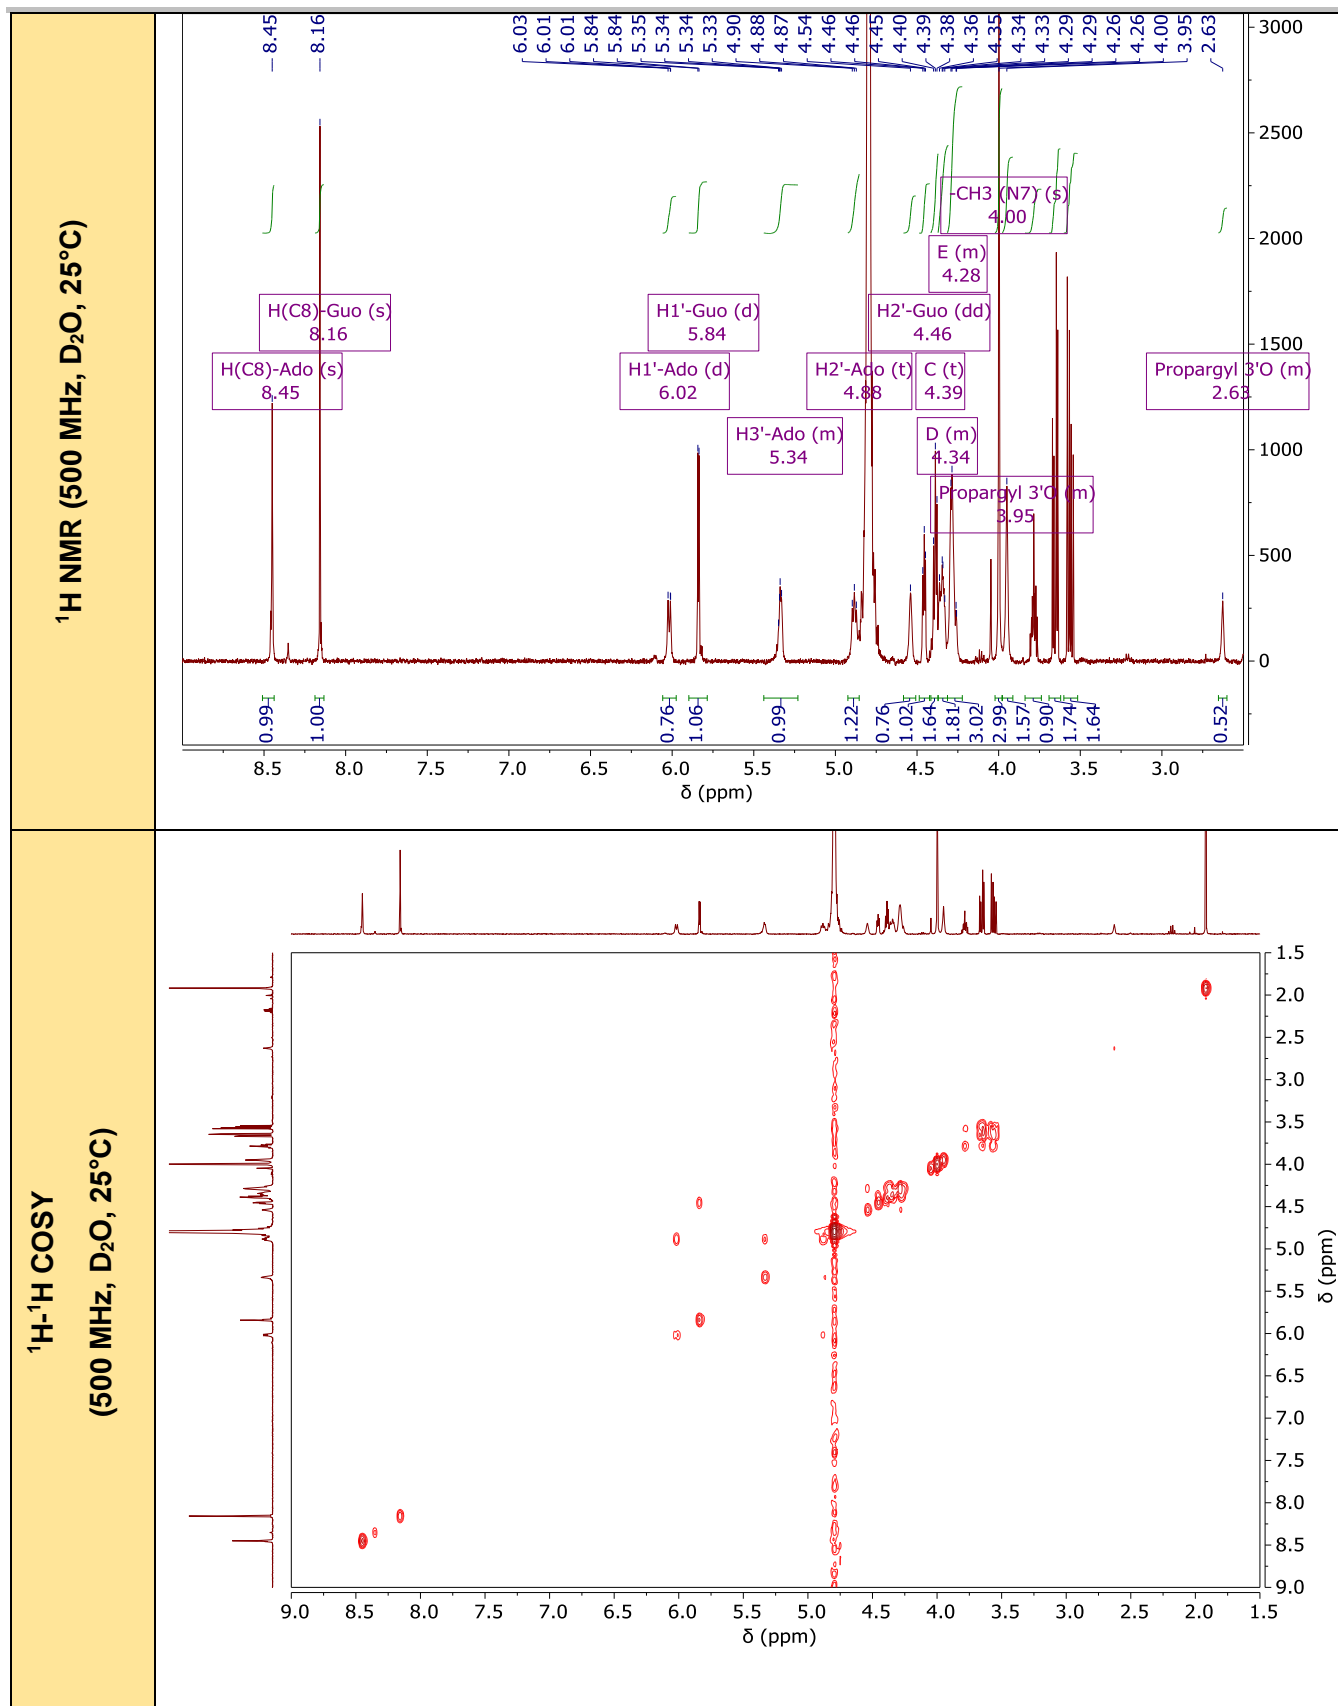

## SUPPORTING INFORMATION

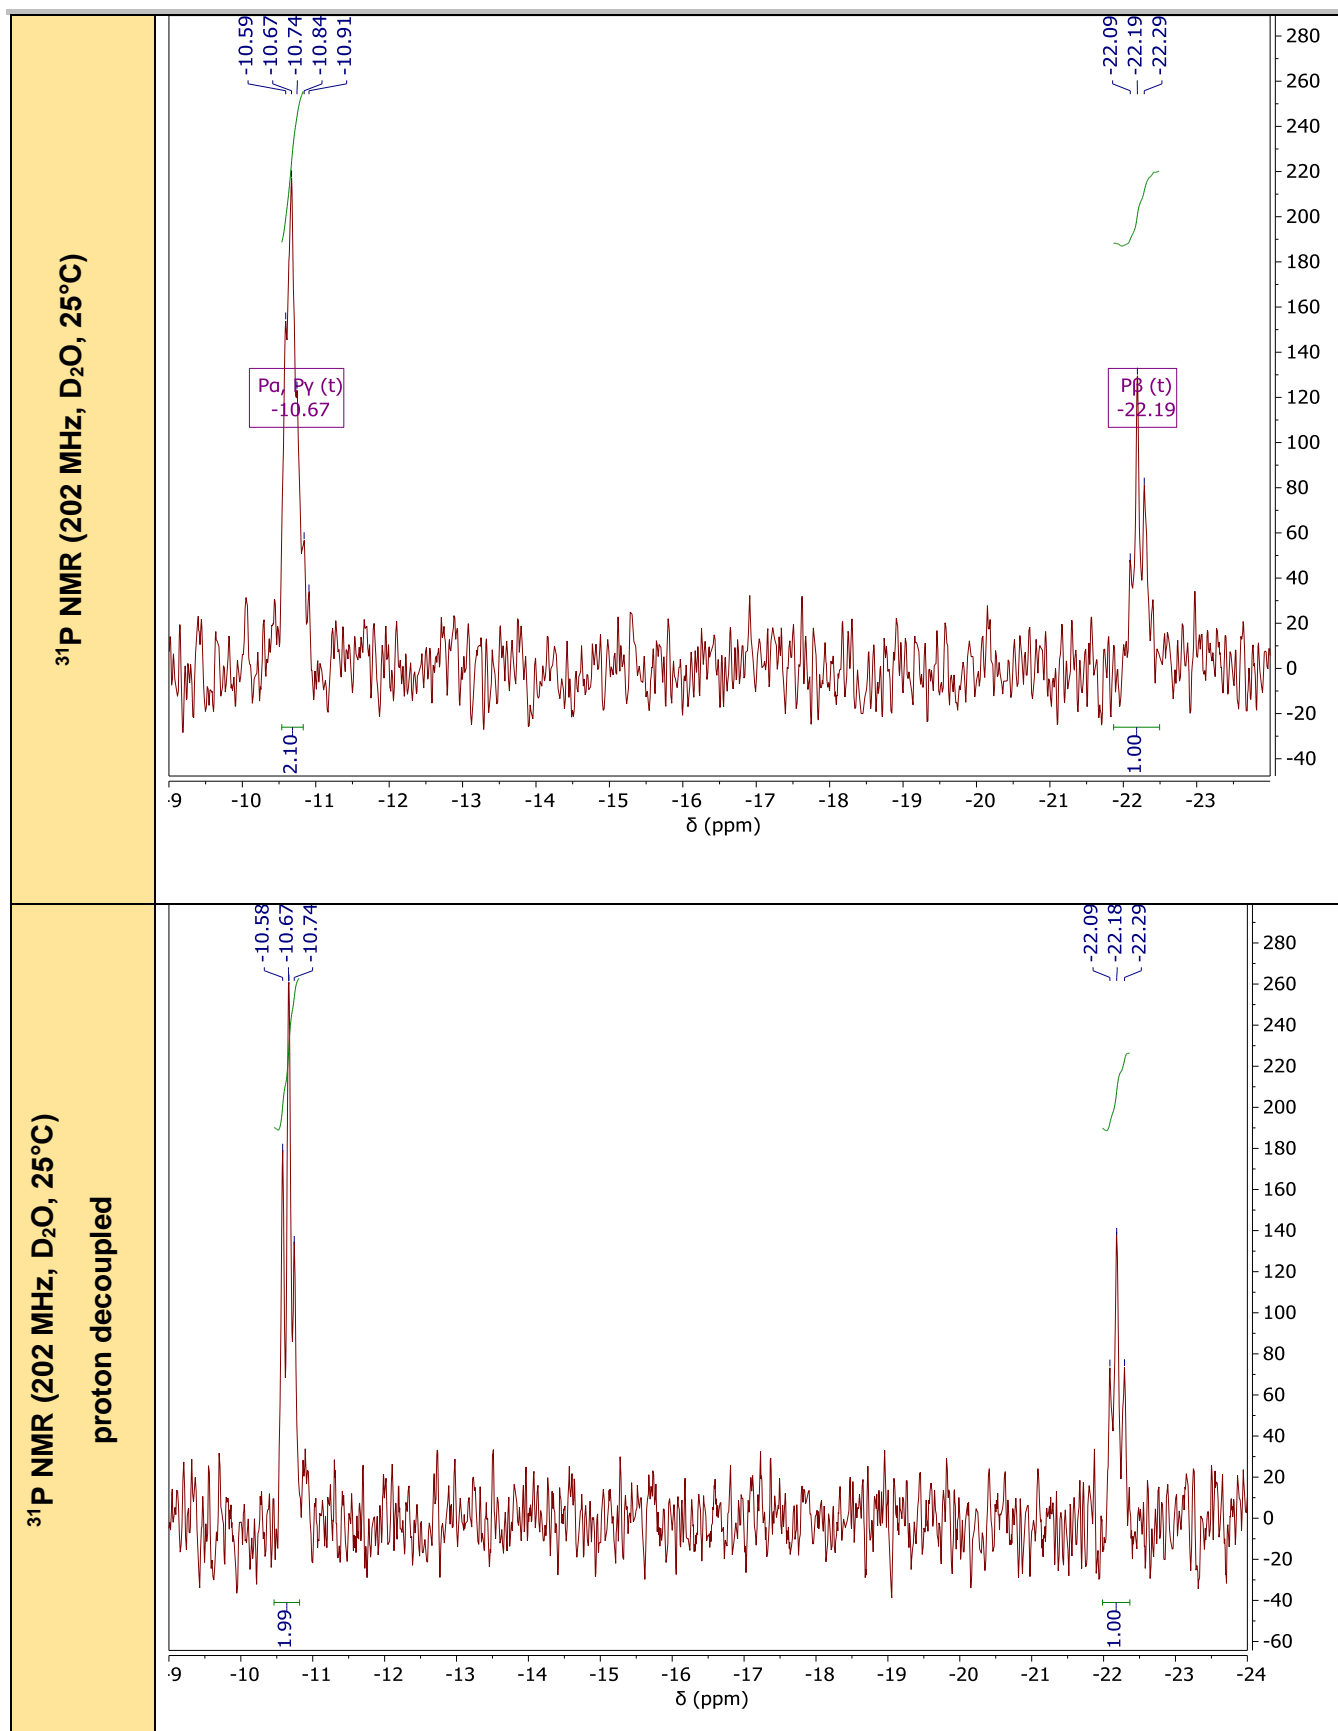



## SUPPORTING INFORMATION

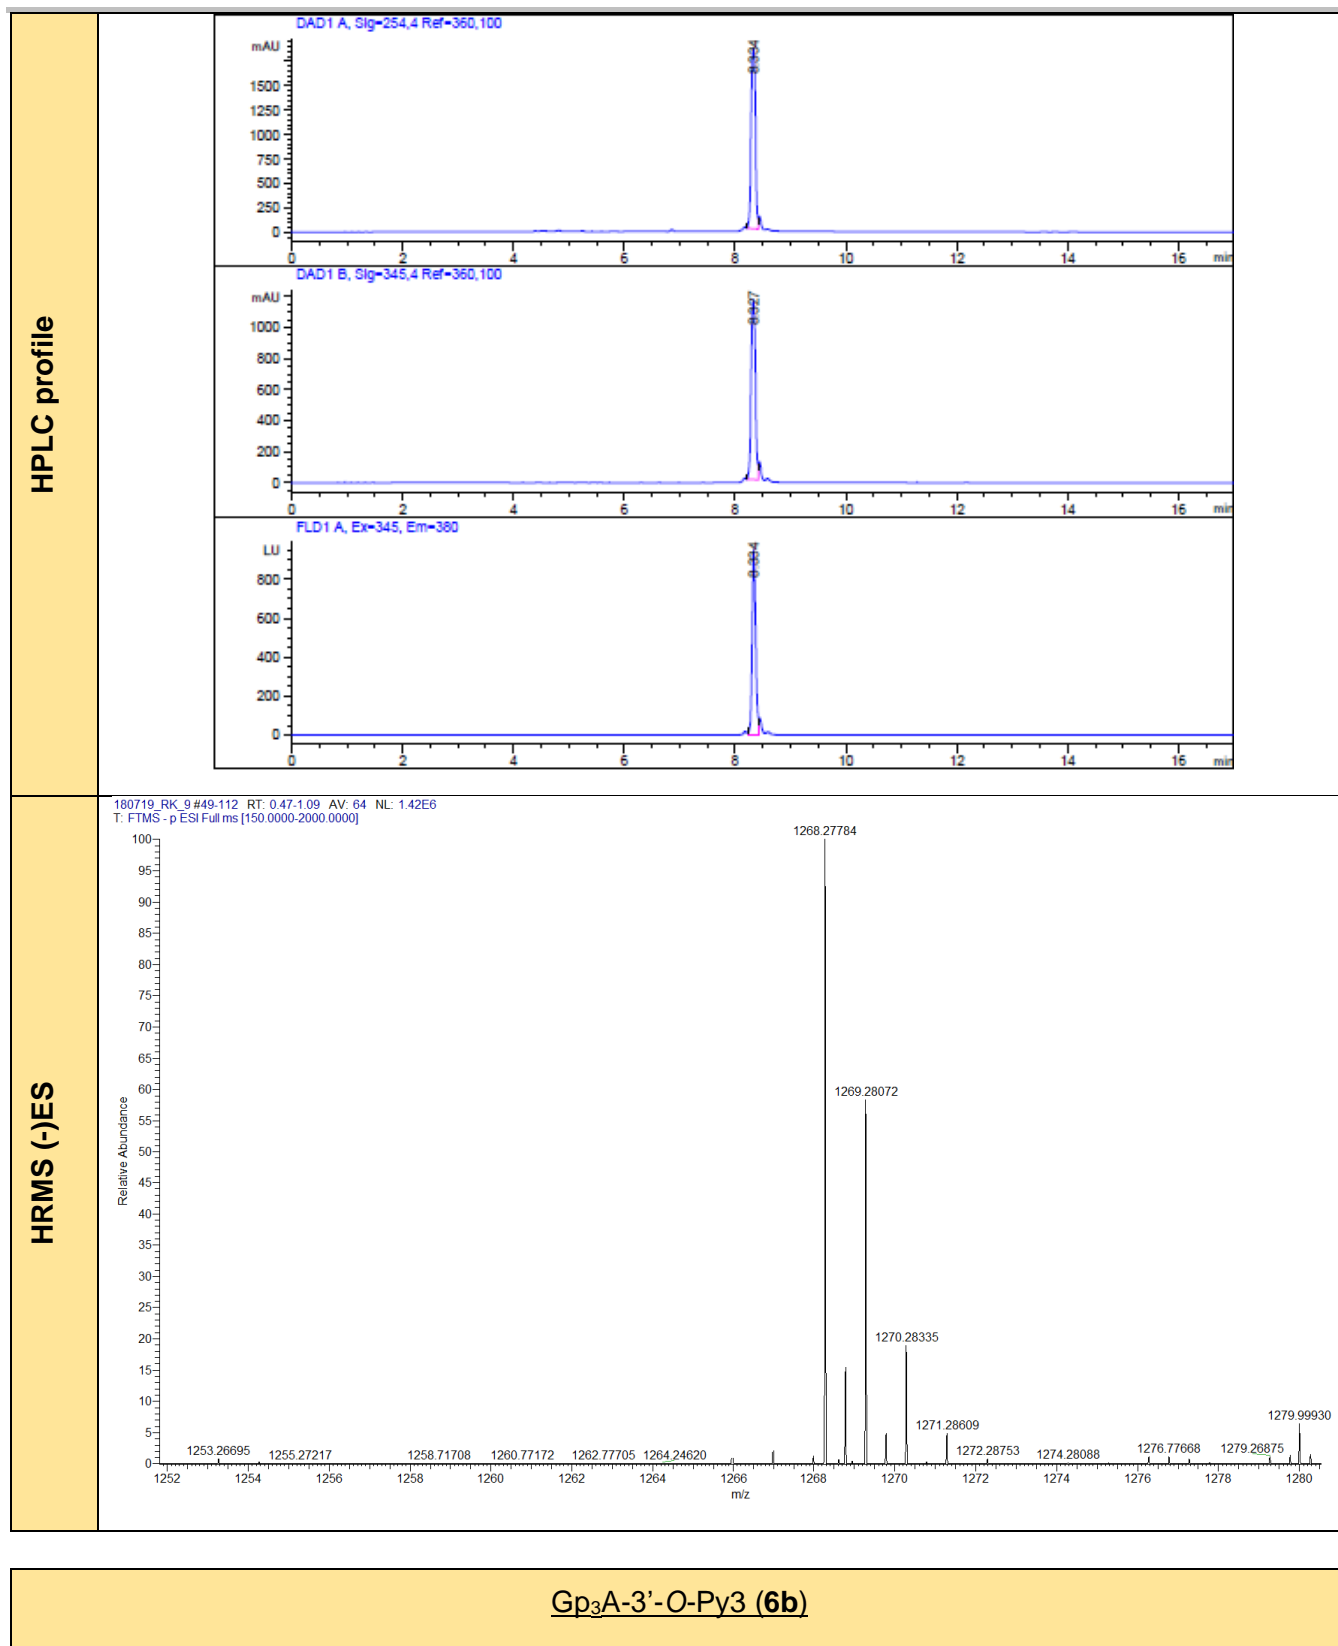



## SUPPORTING INFORMATION

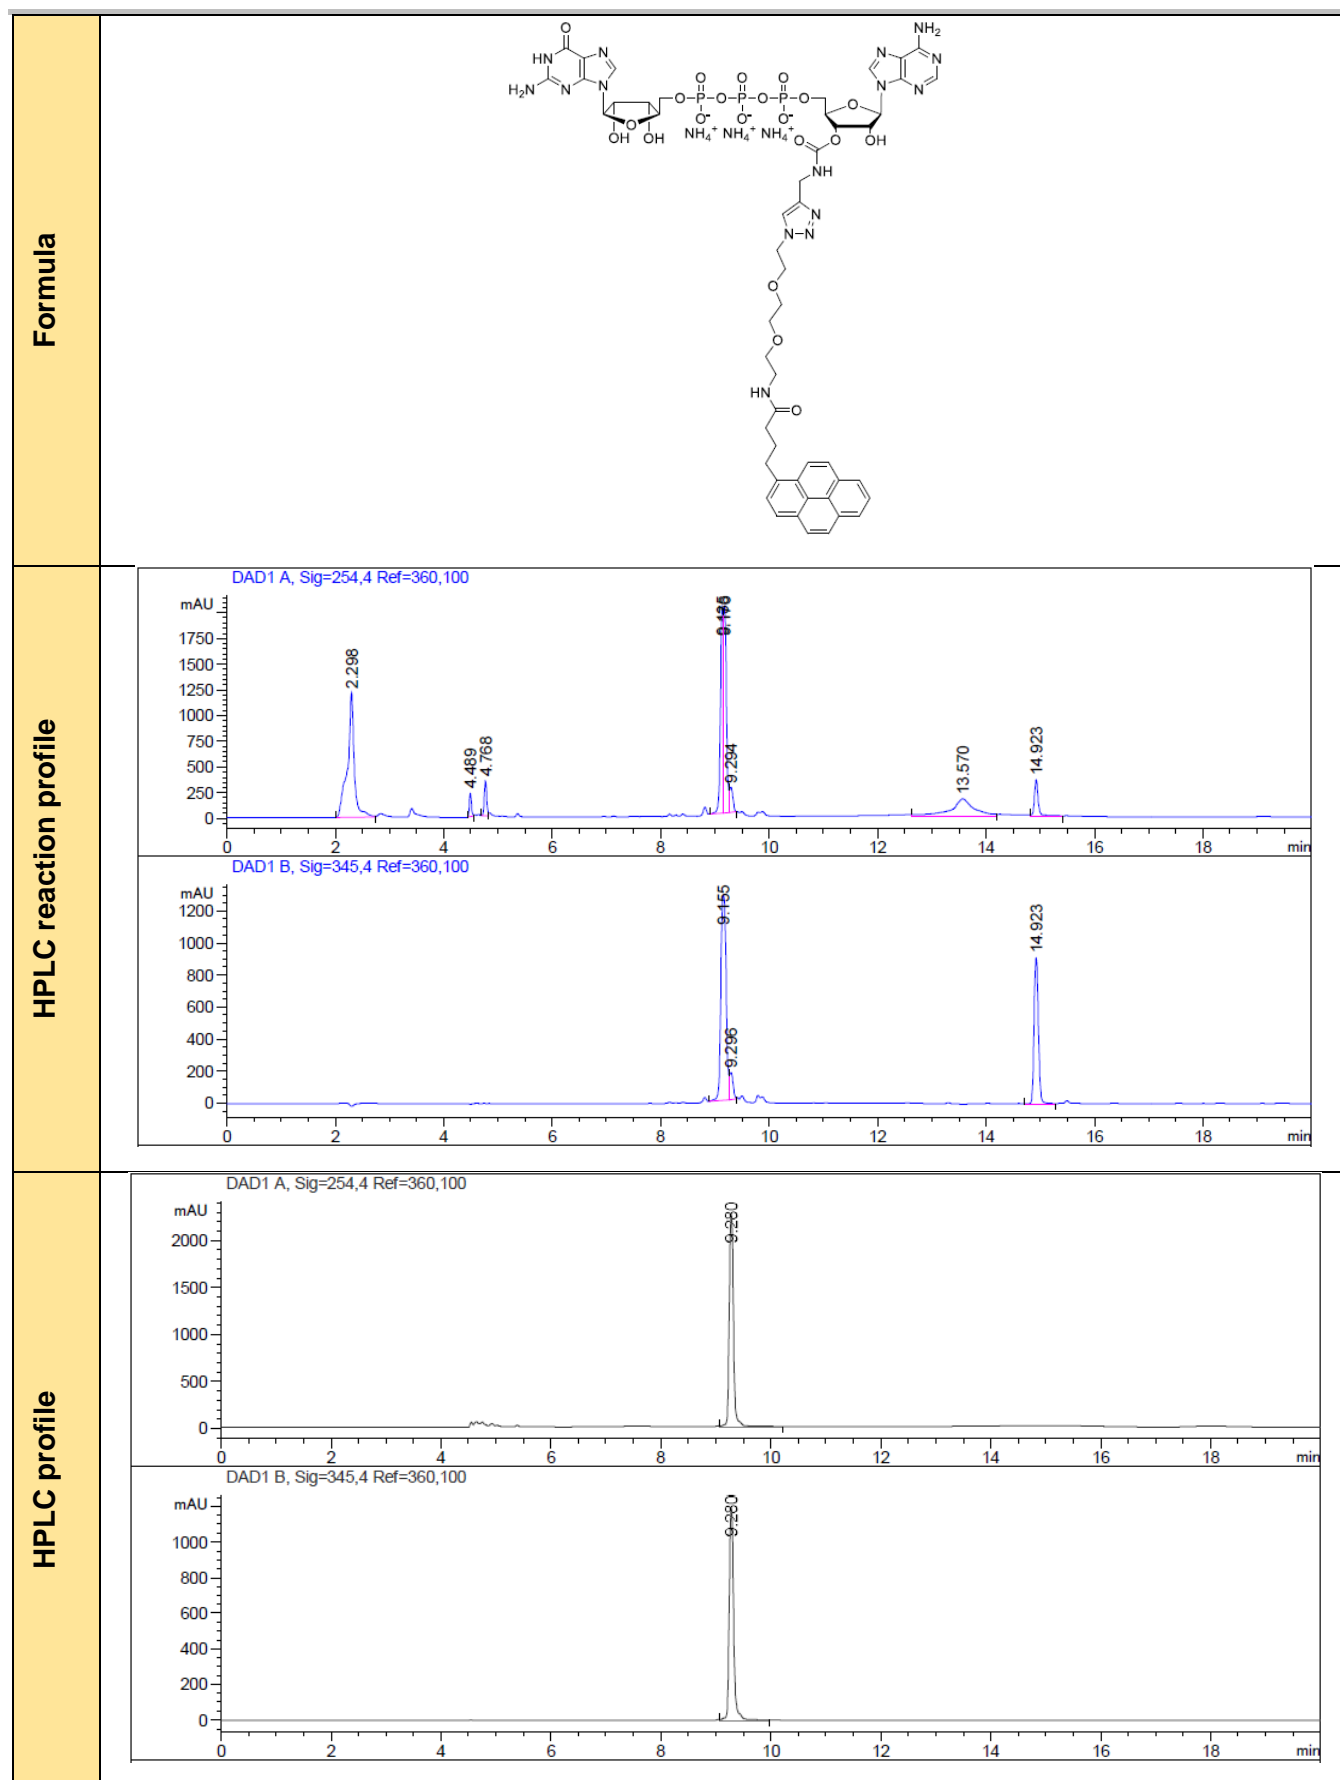

## SUPPORTING INFORMATION

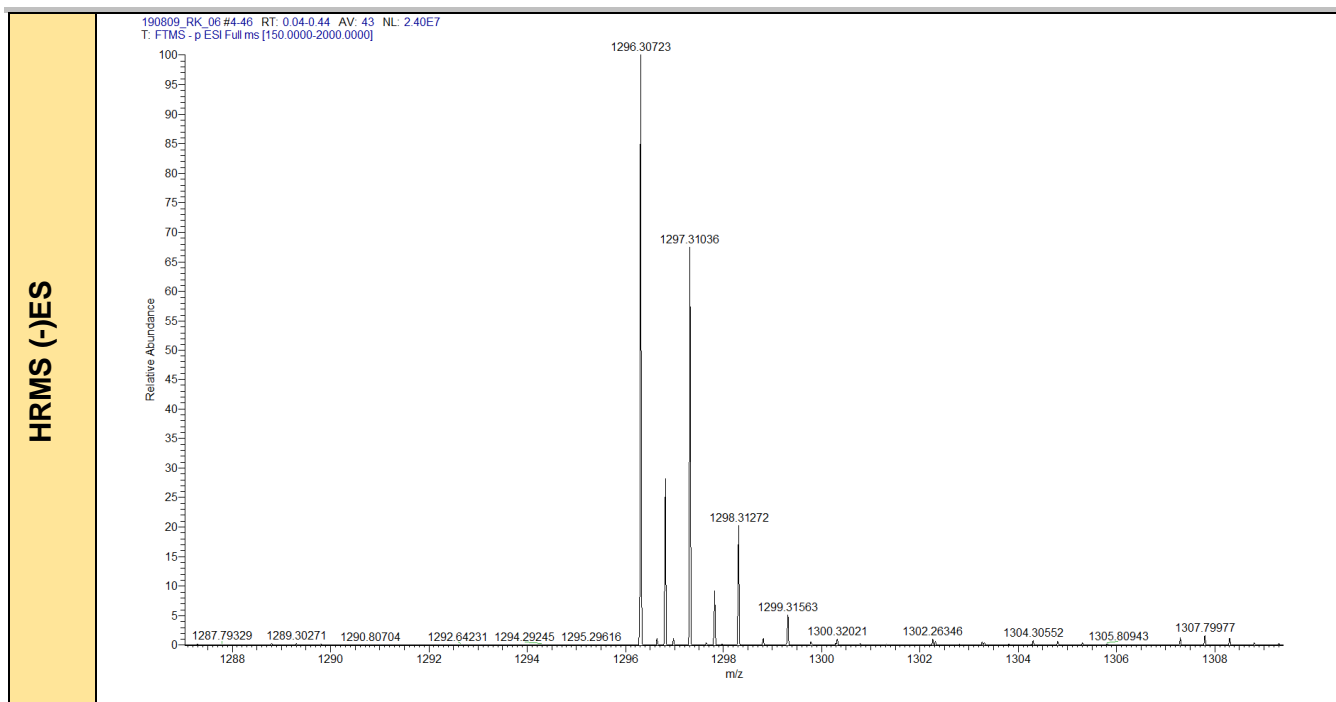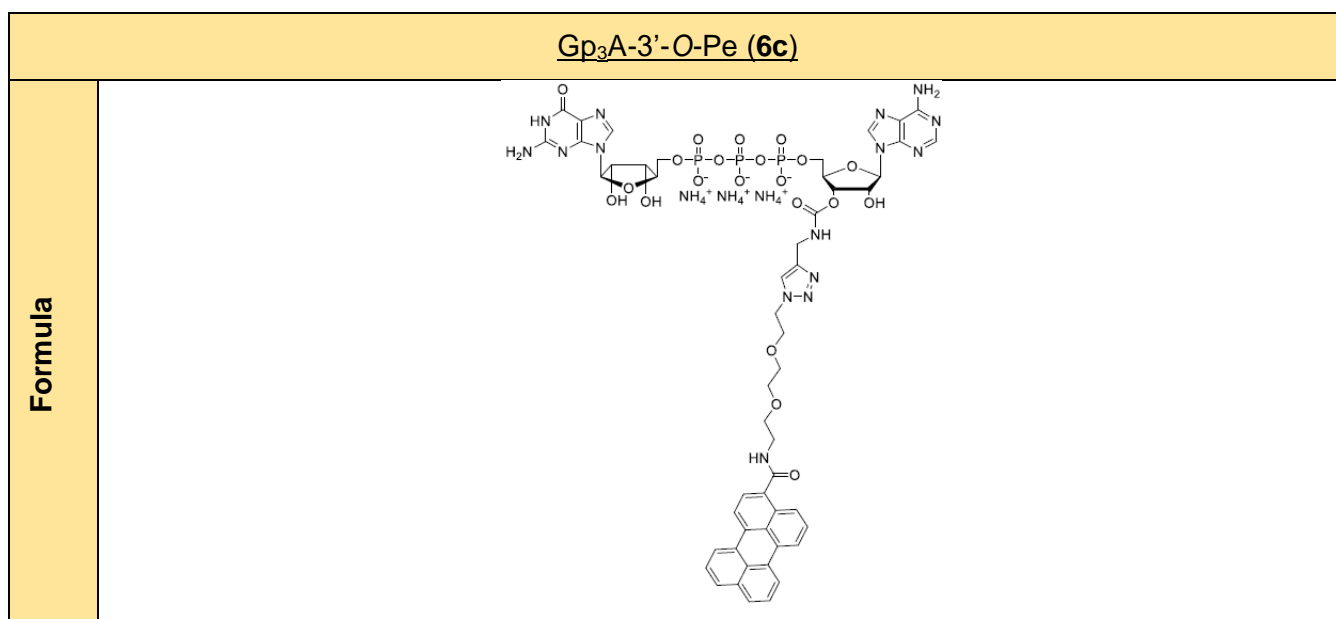**Formula**

SUPPORTING INFORMATION

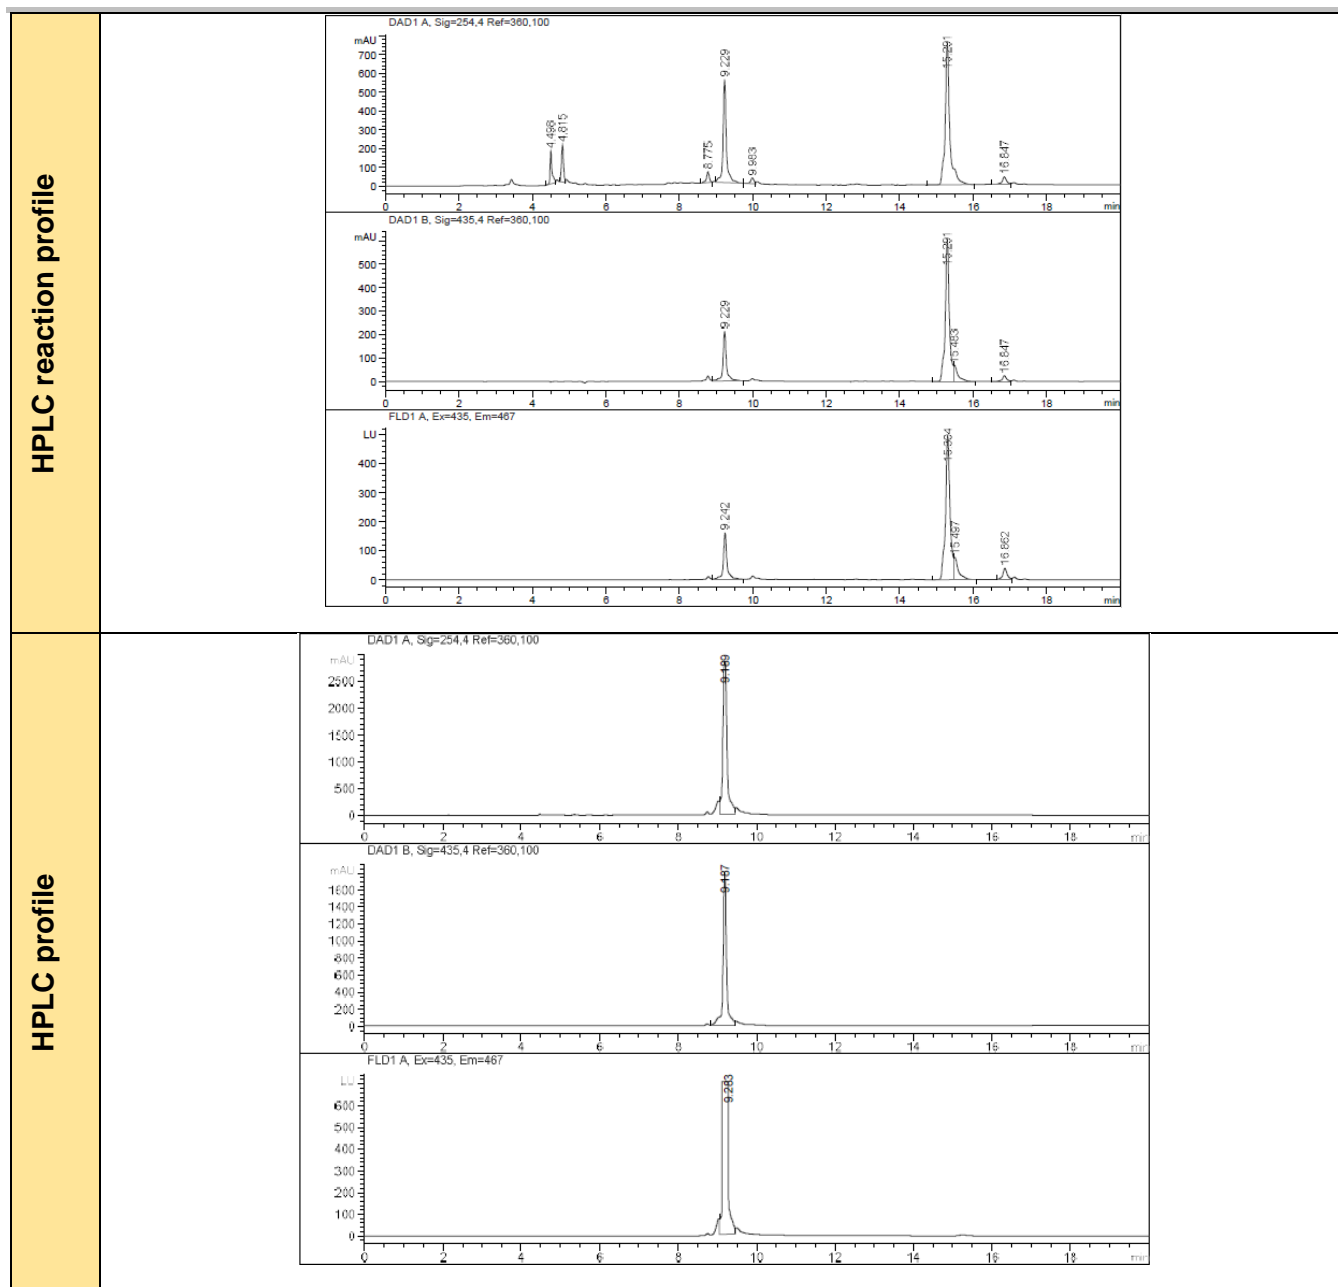



## SUPPORTING INFORMATION

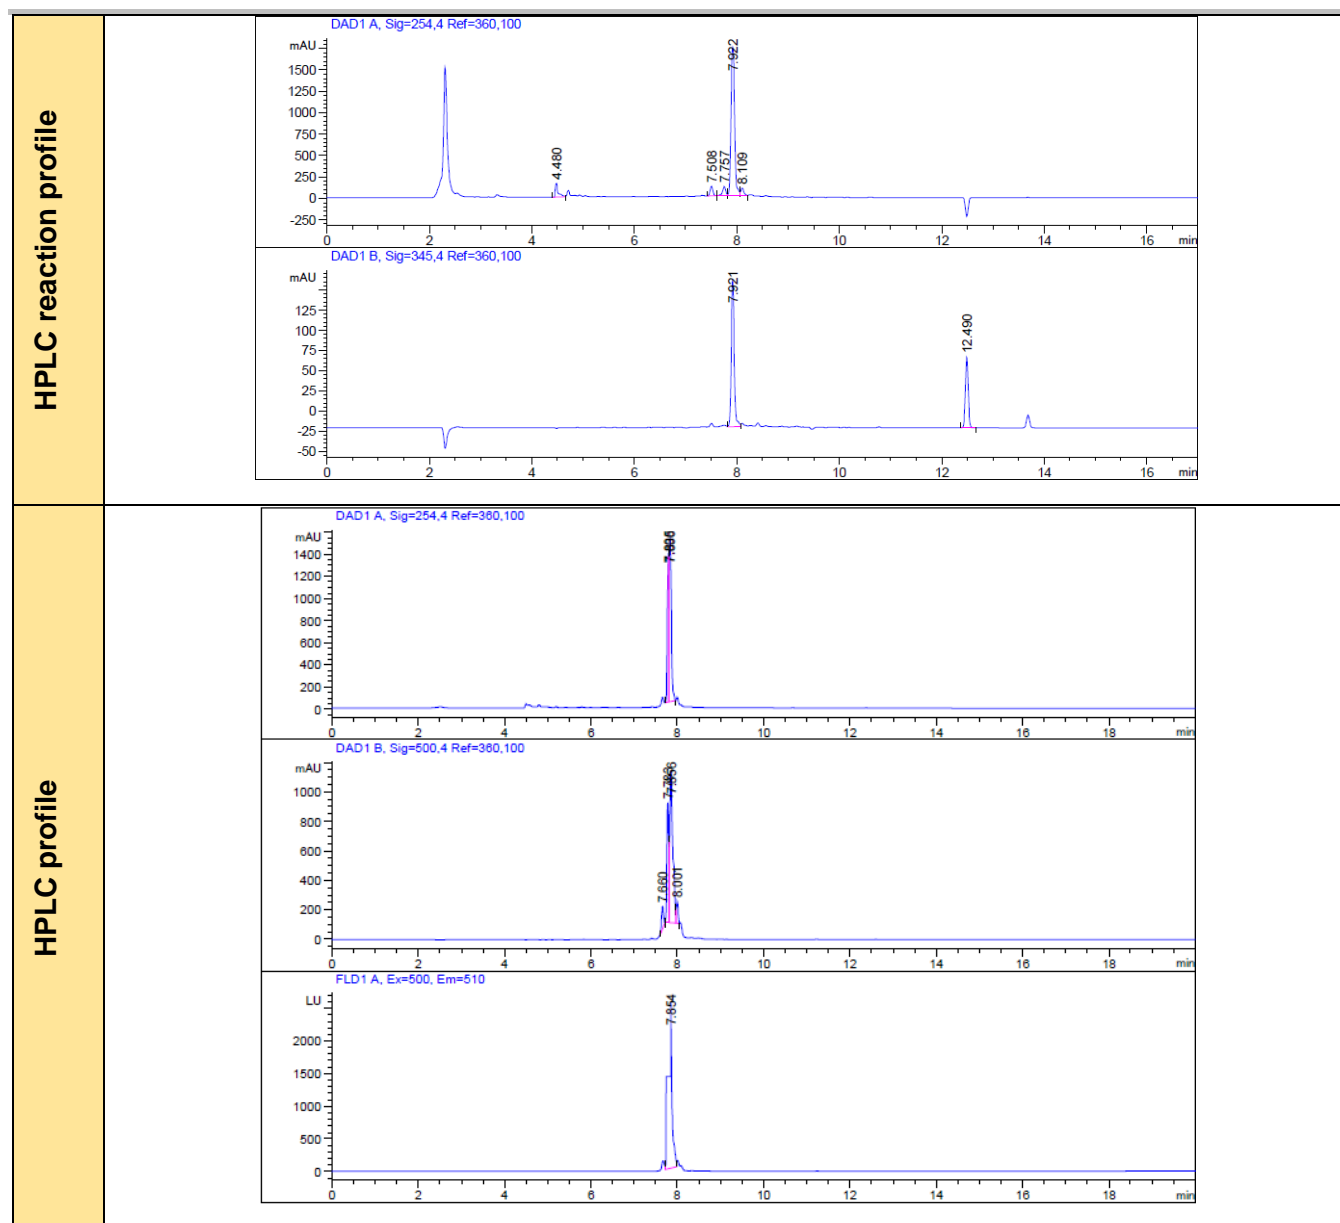

## SUPPORTING INFORMATION

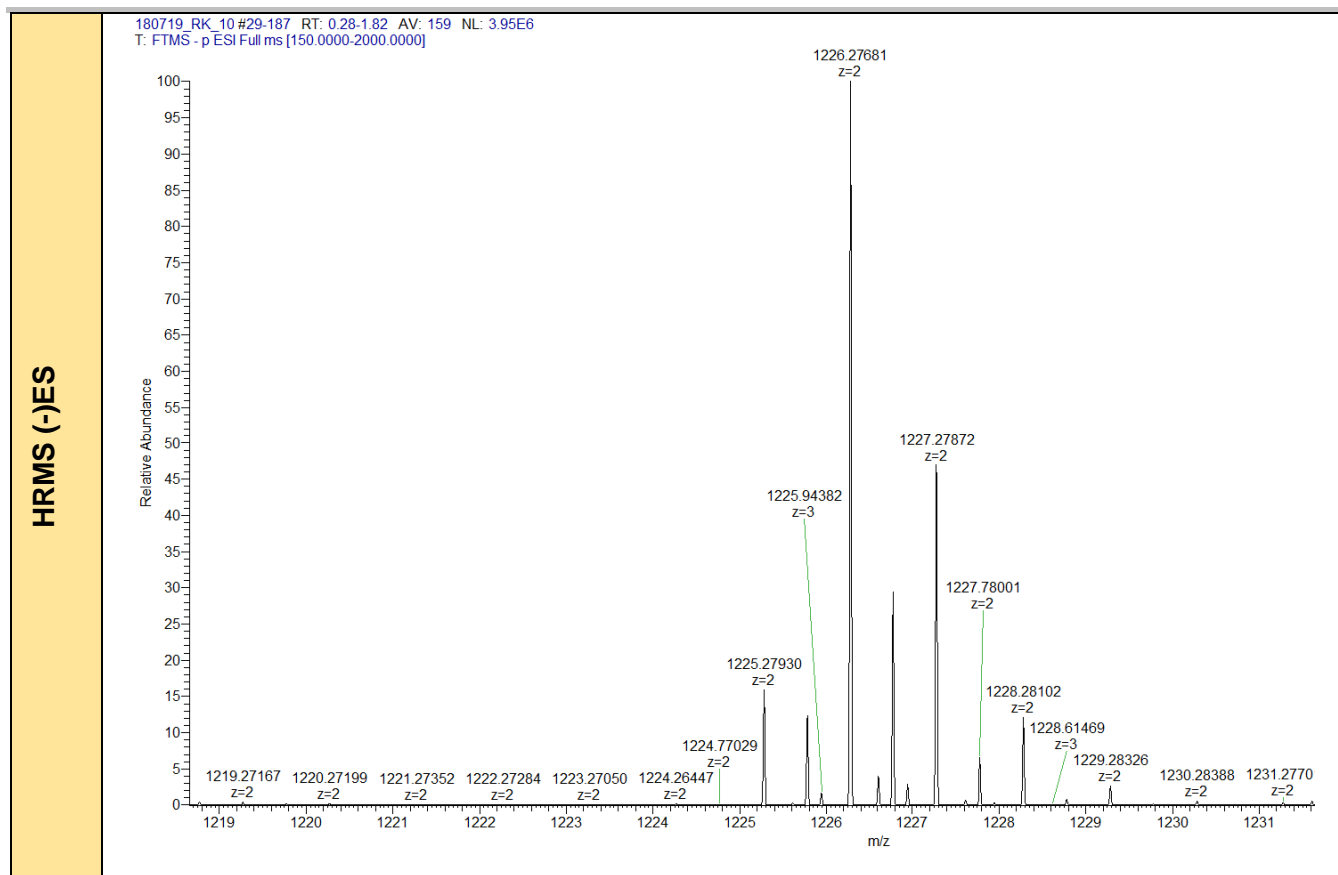**Gp<sub>3</sub>A-3'-O-(5)FAM (6e)**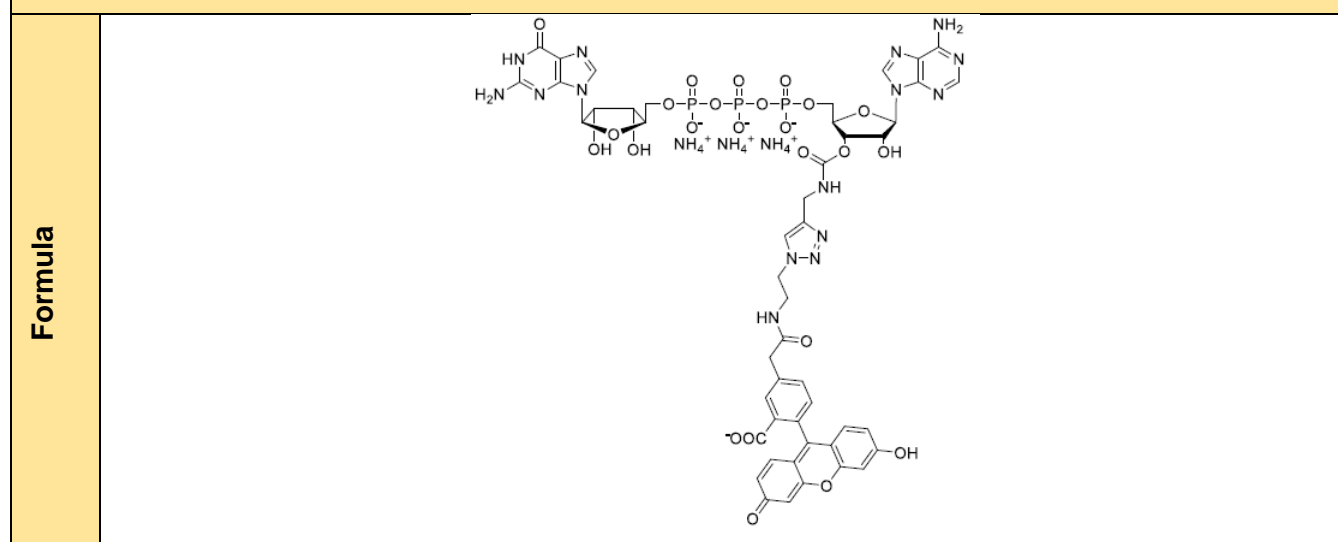

## SUPPORTING INFORMATION

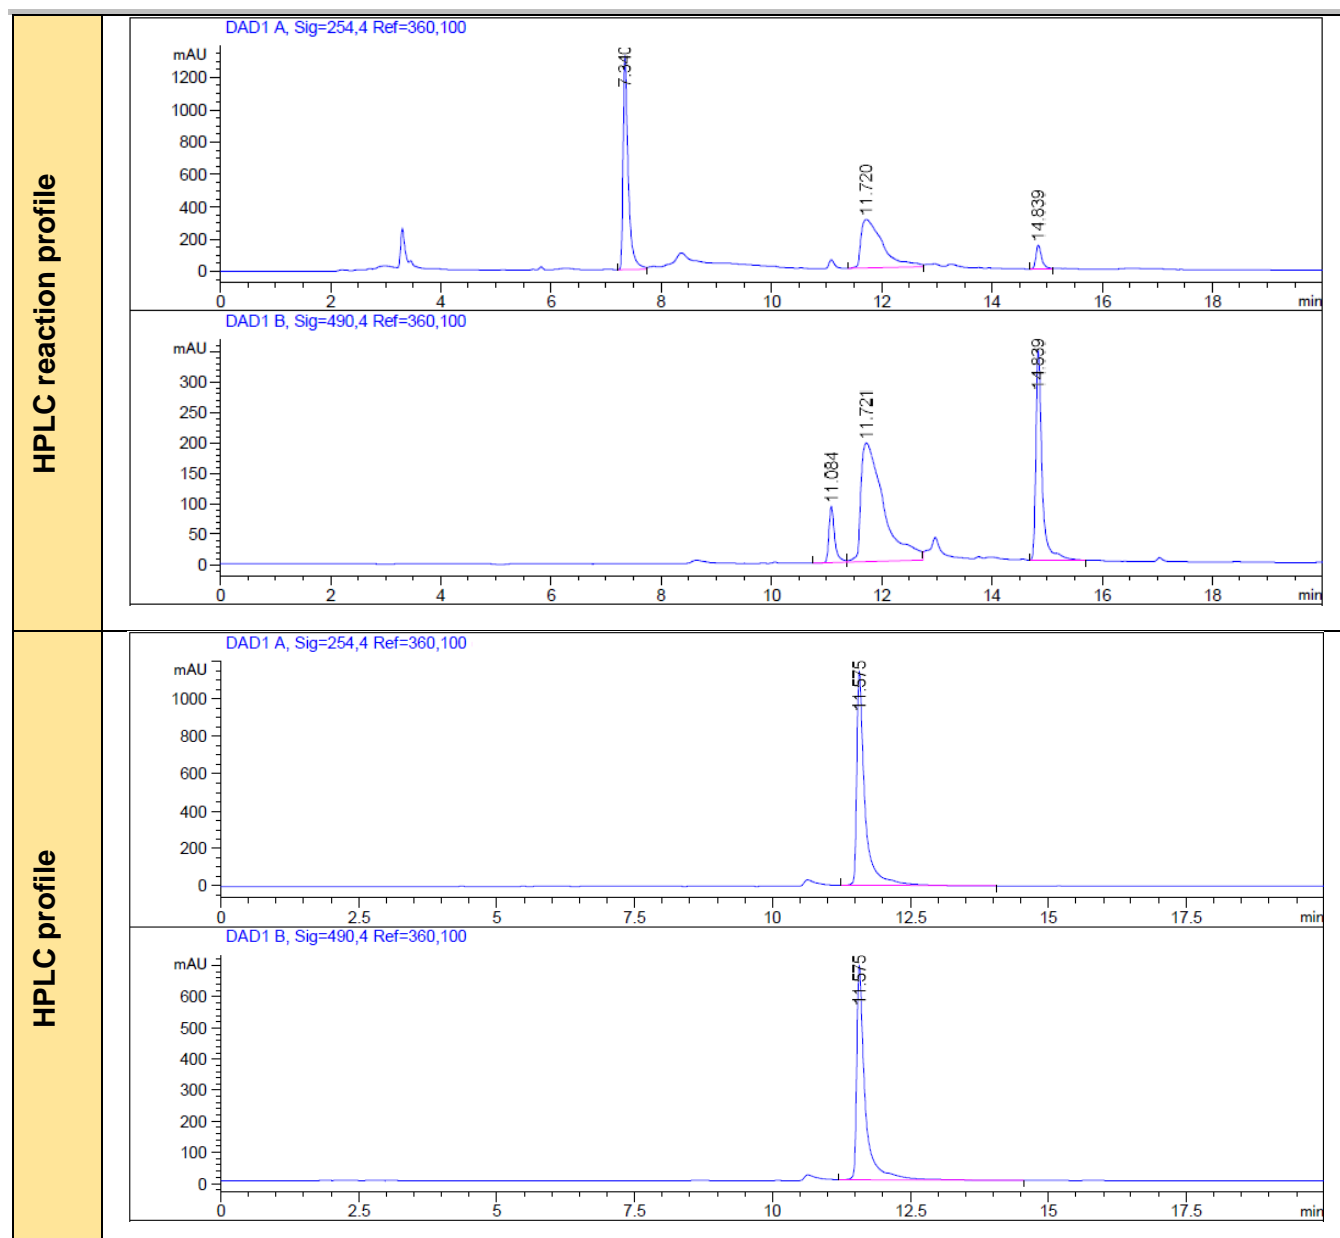

## SUPPORTING INFORMATION

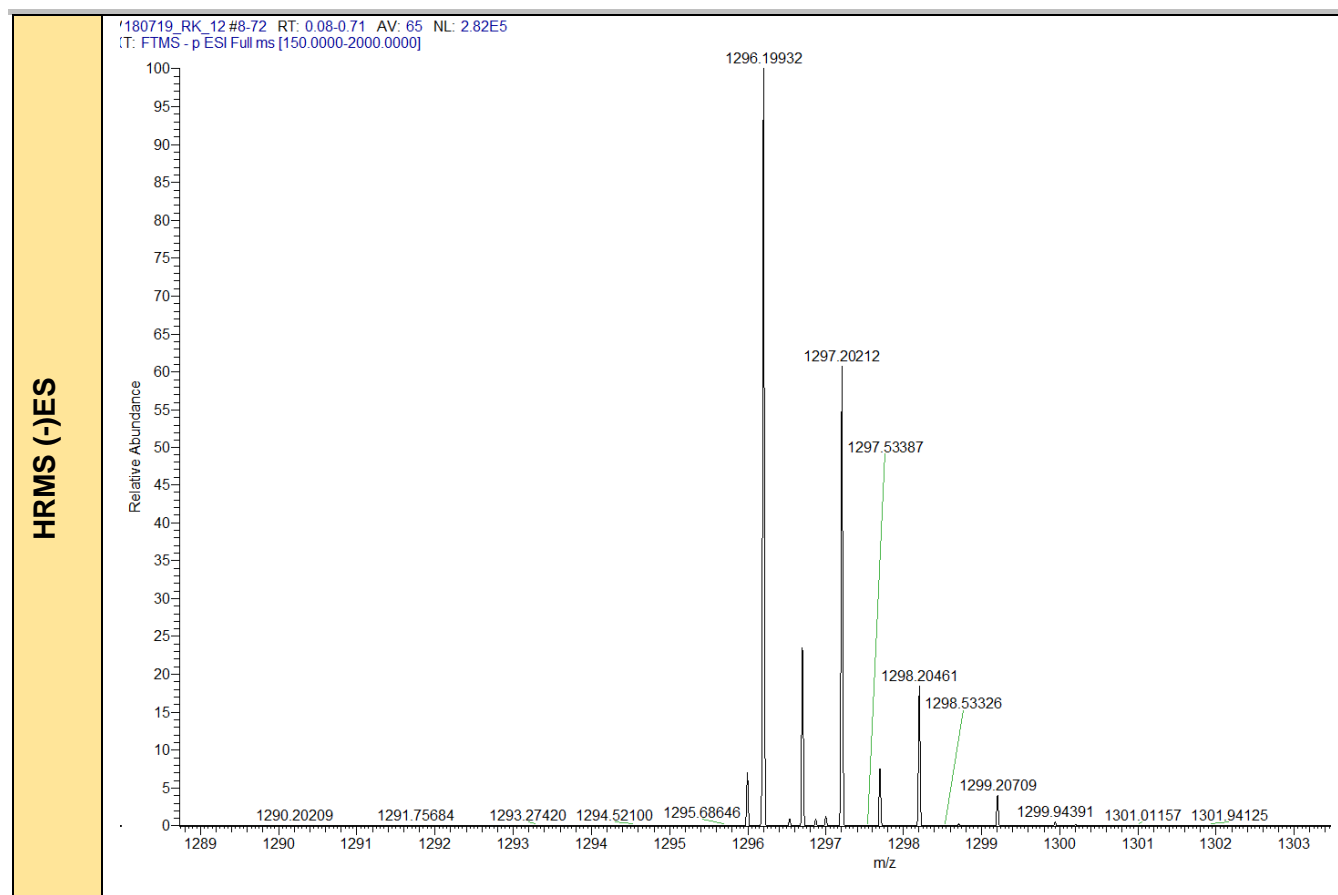**Gp<sub>3</sub>A-3'-O-Cy3 (6f)**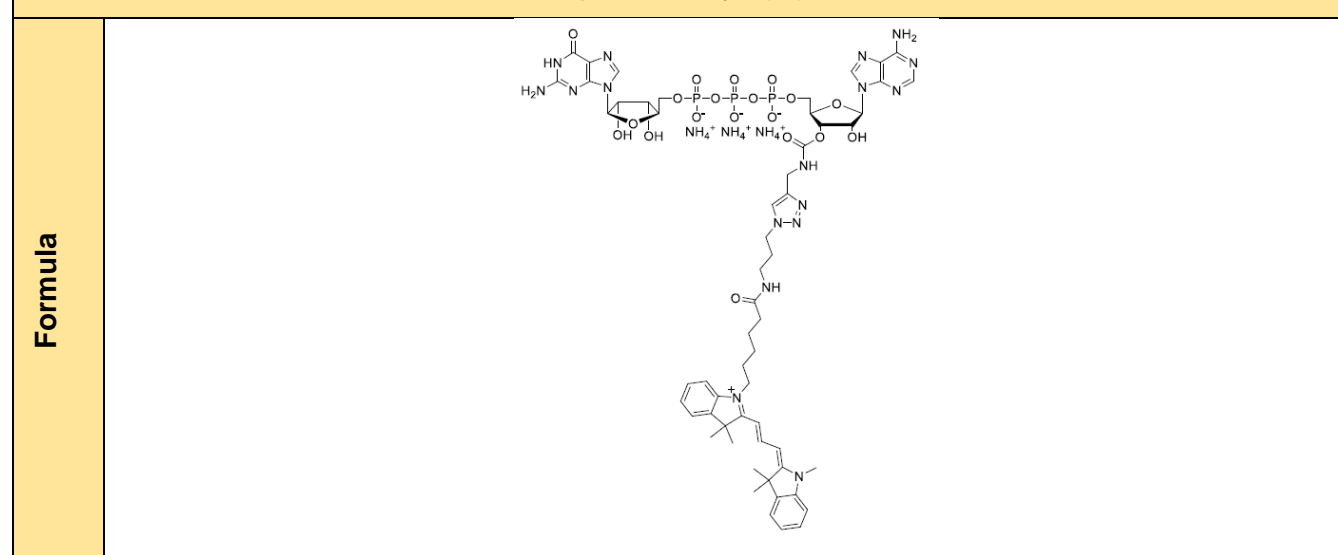



## SUPPORTING INFORMATION

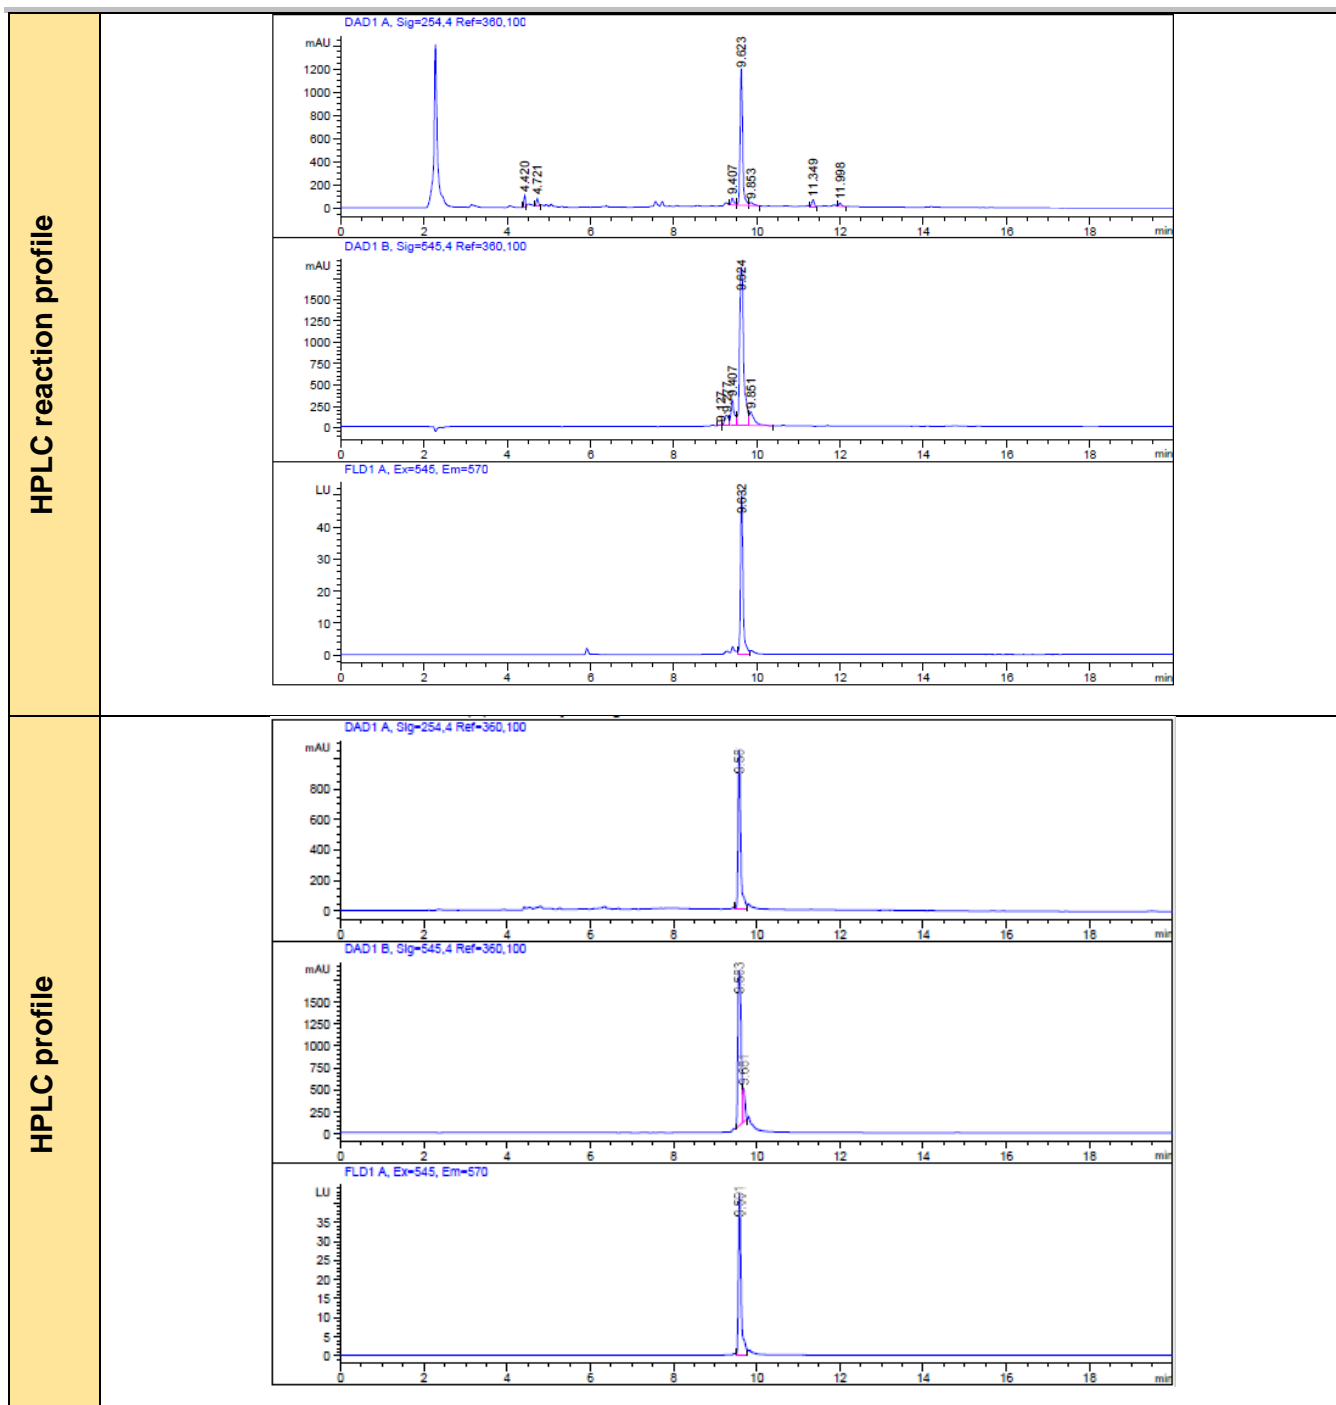



## SUPPORTING INFORMATION

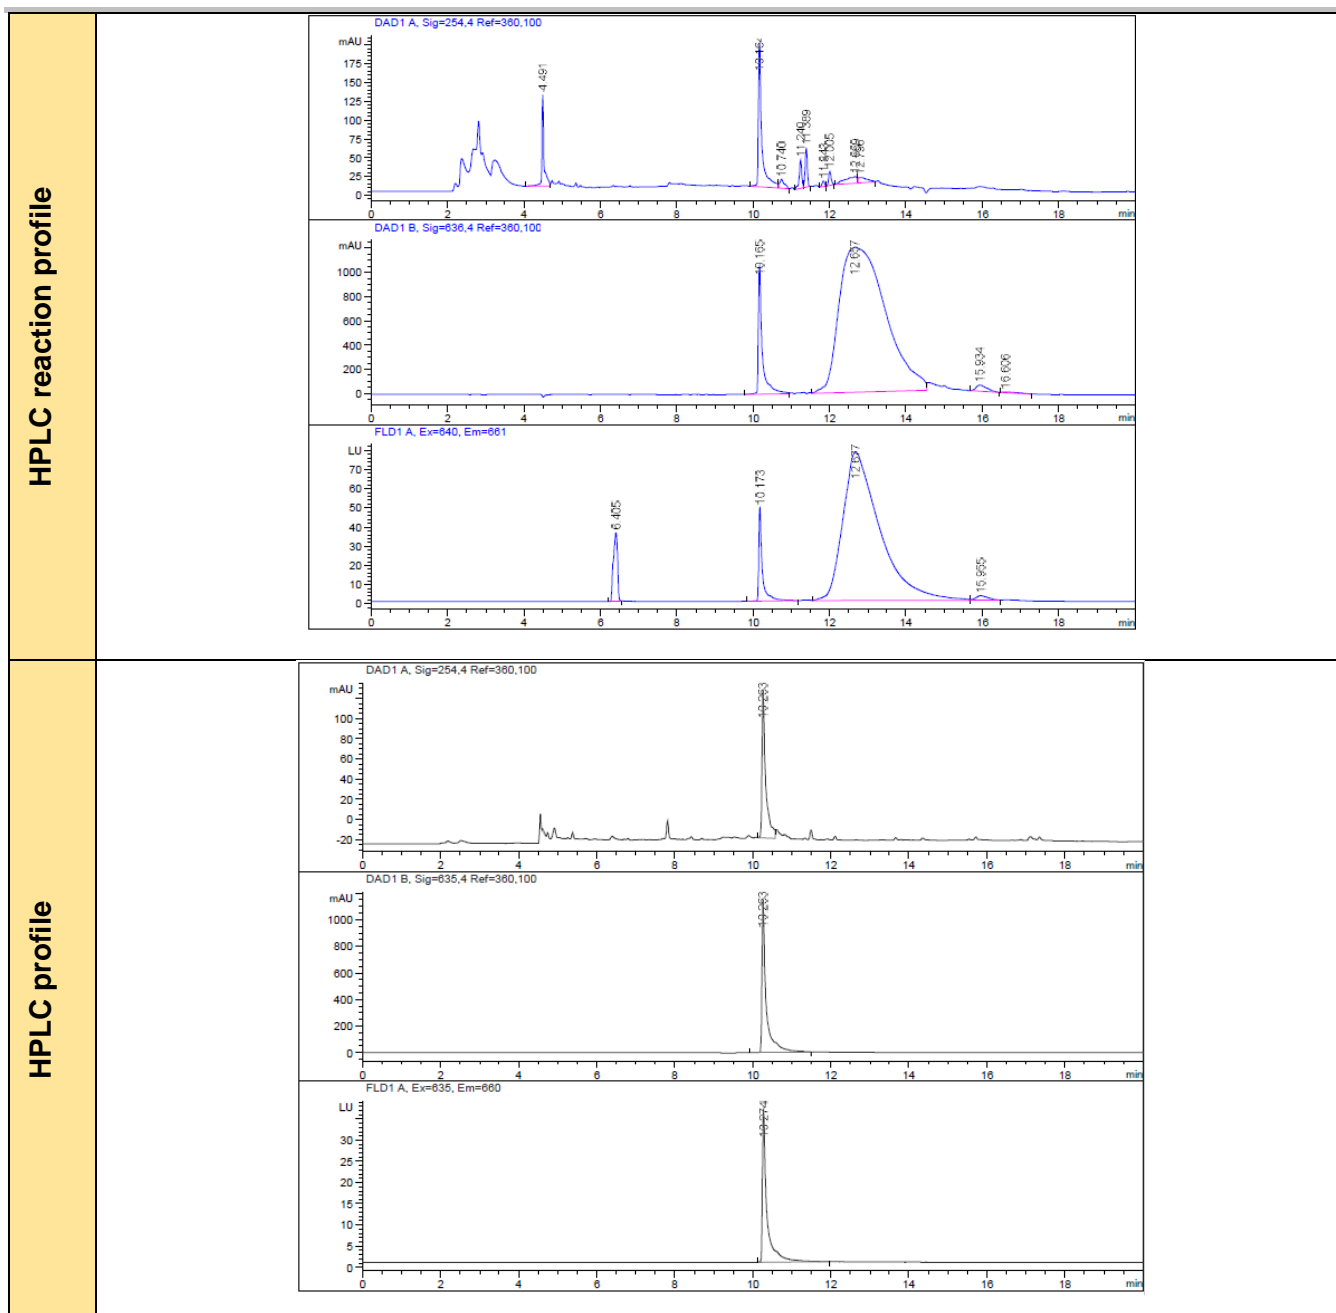



## SUPPORTING INFORMATION

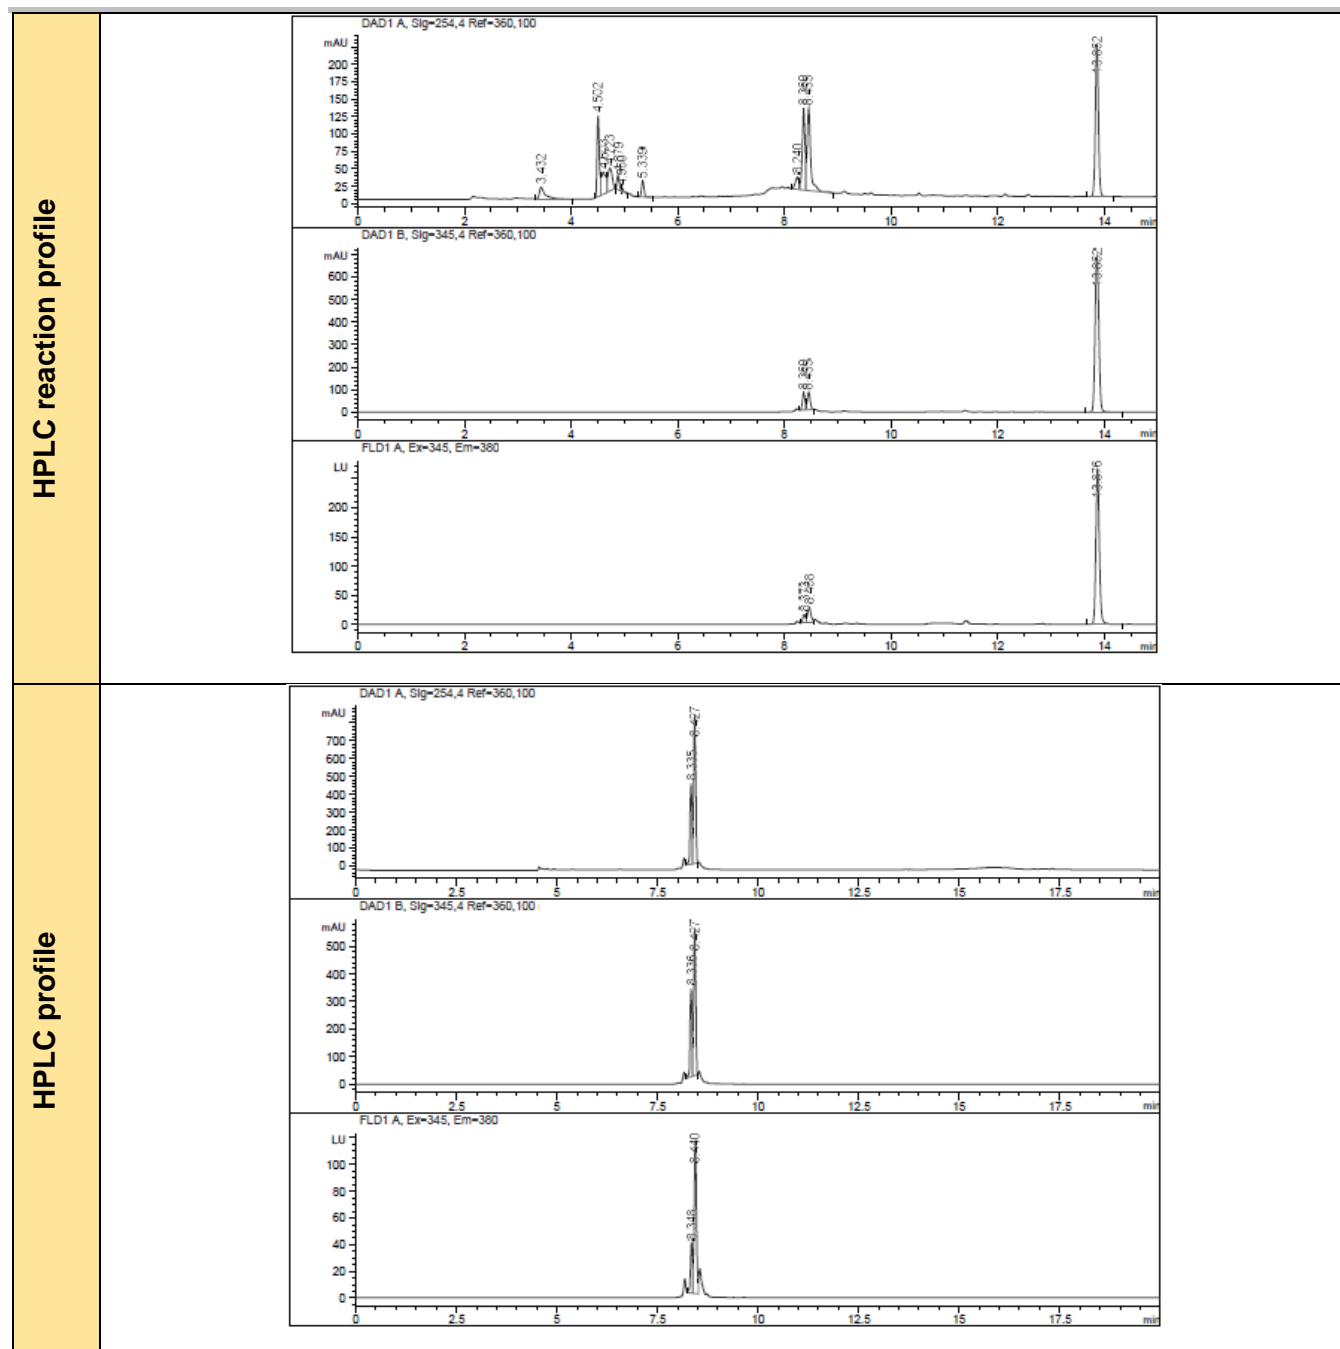

## SUPPORTING INFORMATION

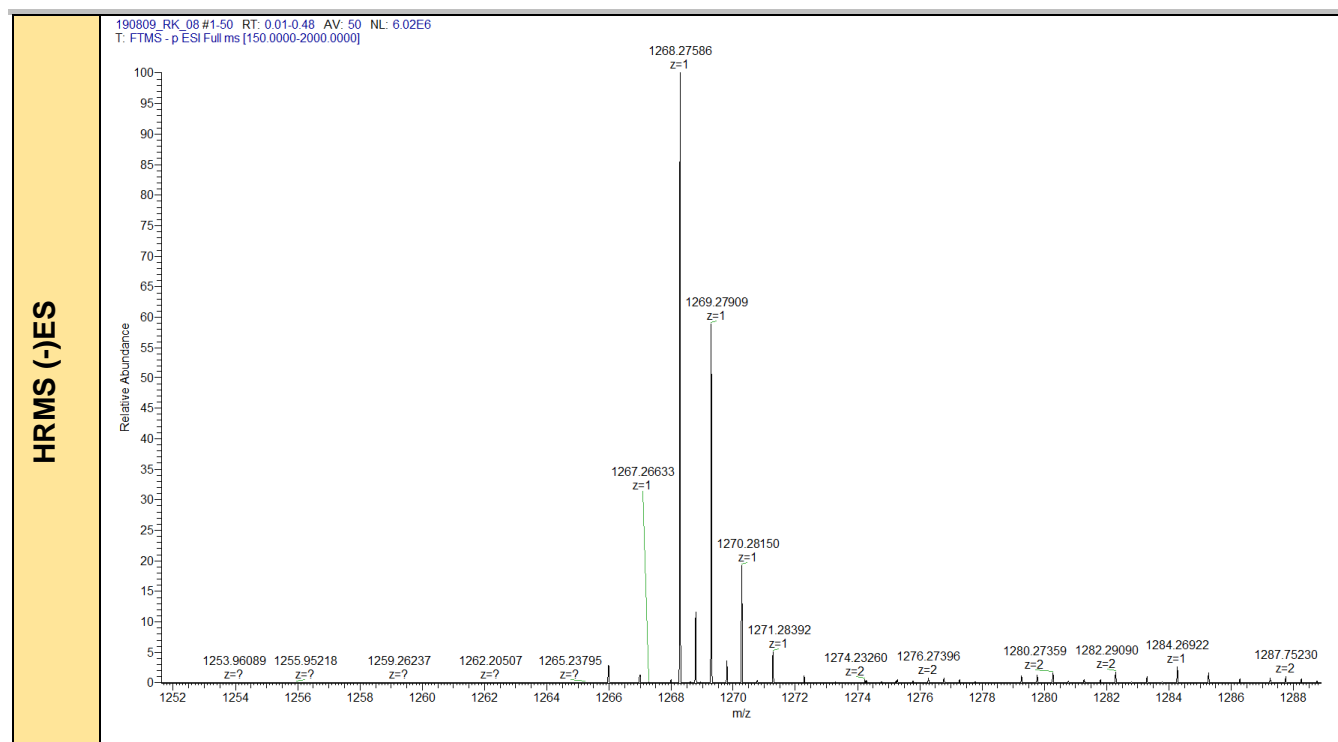Gp<sub>3</sub>A(N6)-Py(8)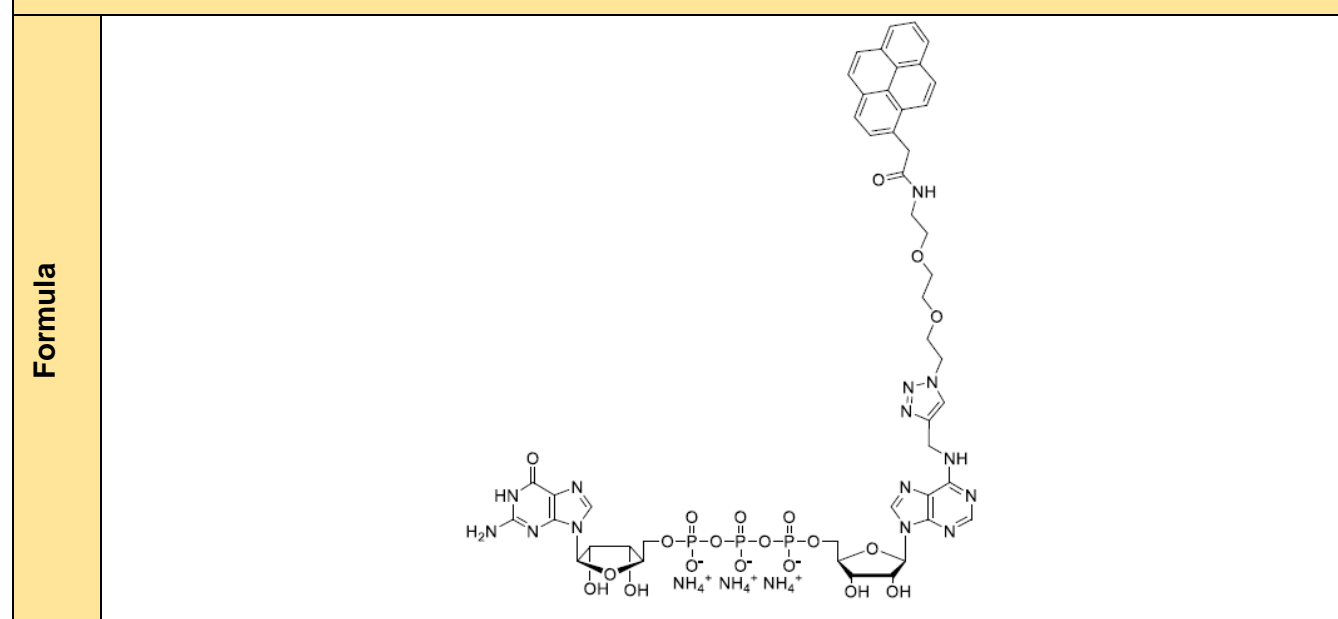

## SUPPORTING INFORMATION

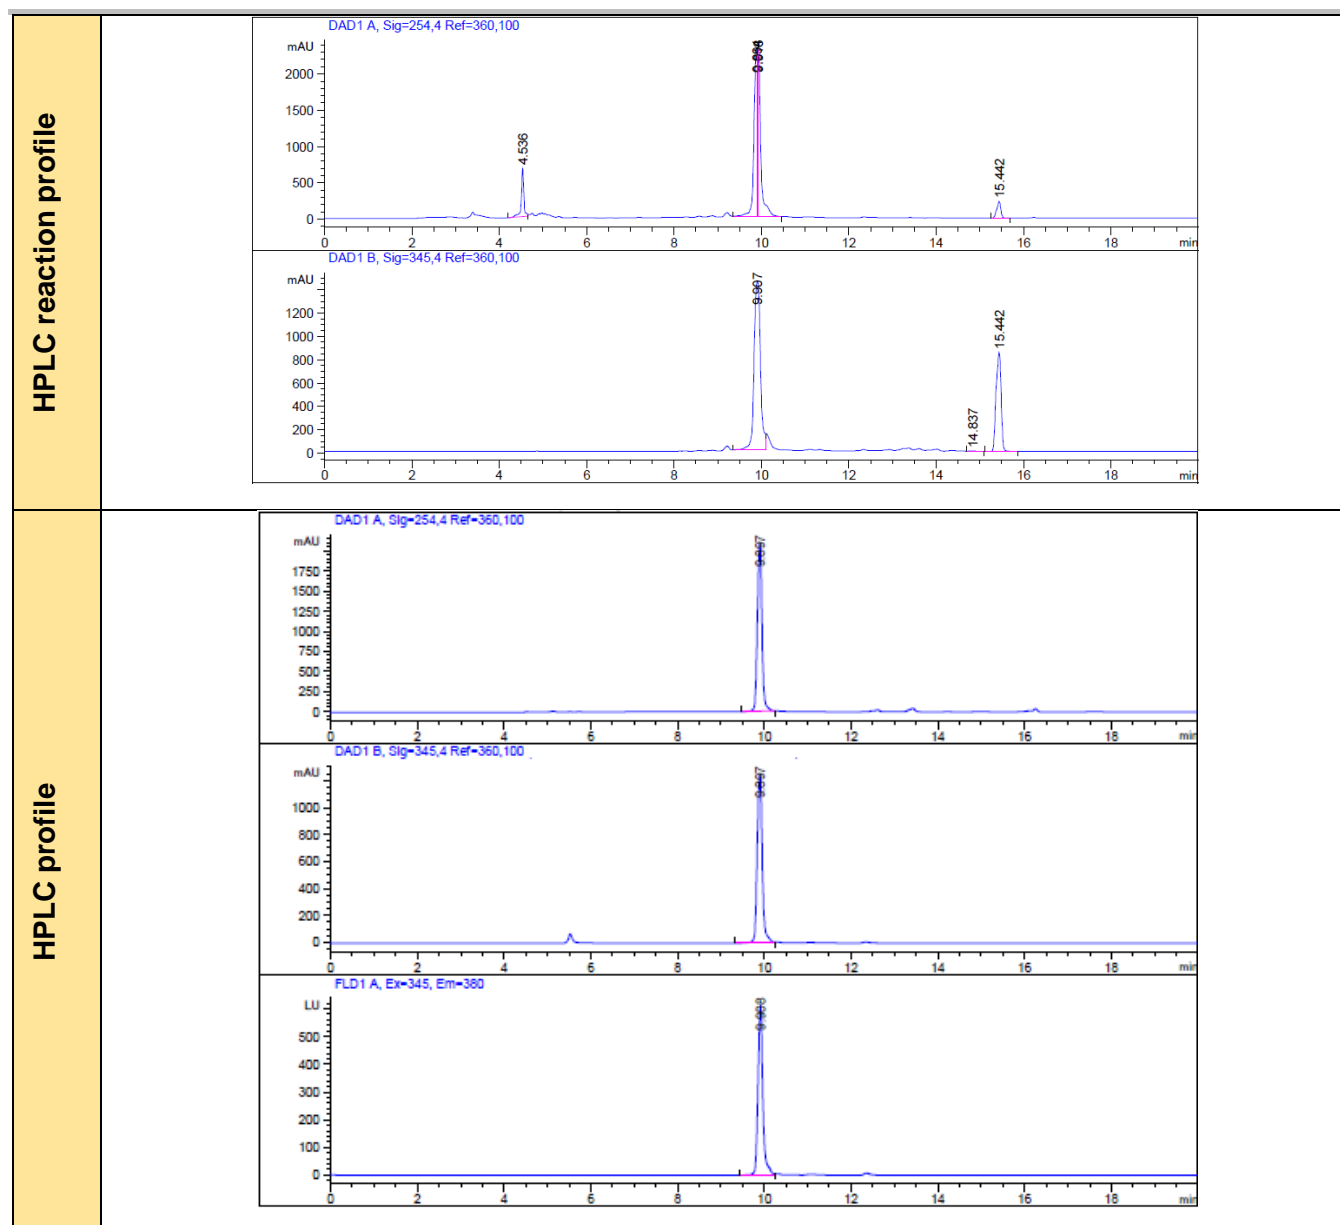

## SUPPORTING INFORMATION

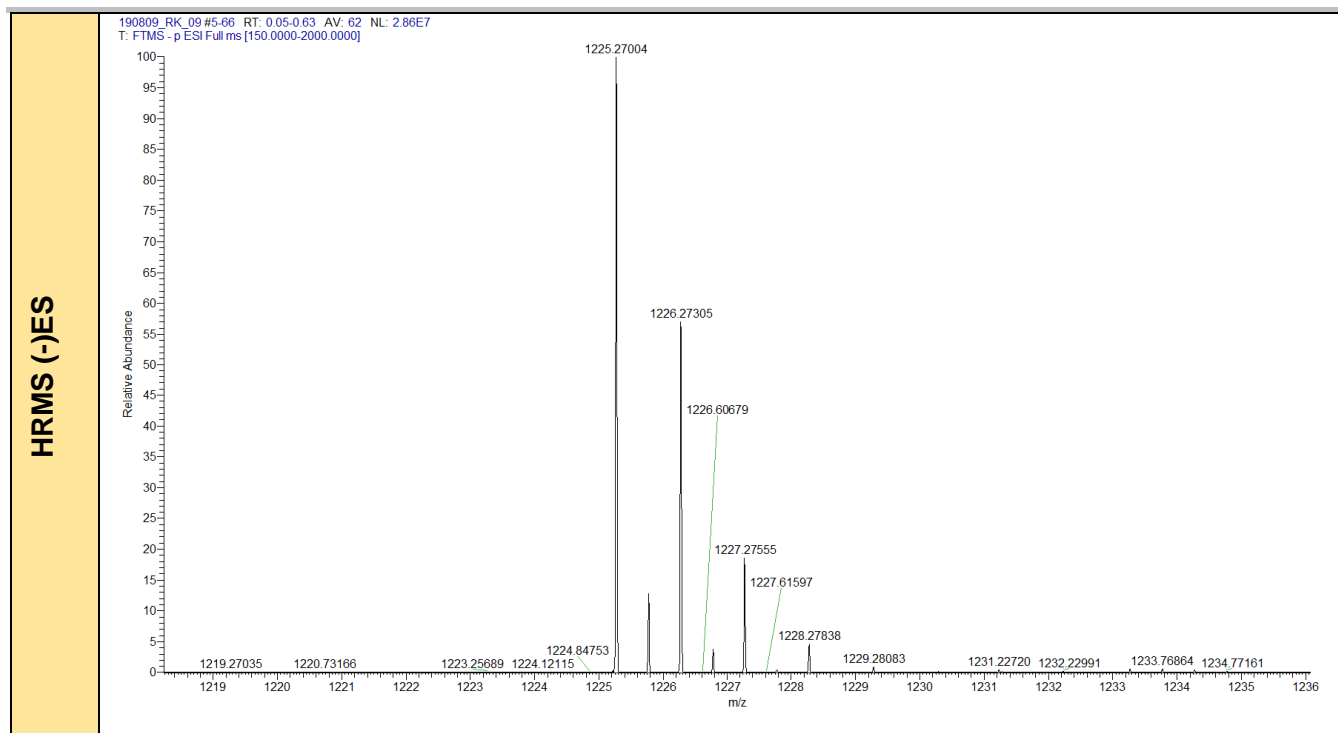**Gp<sub>3</sub>G(N1)-Py(9)**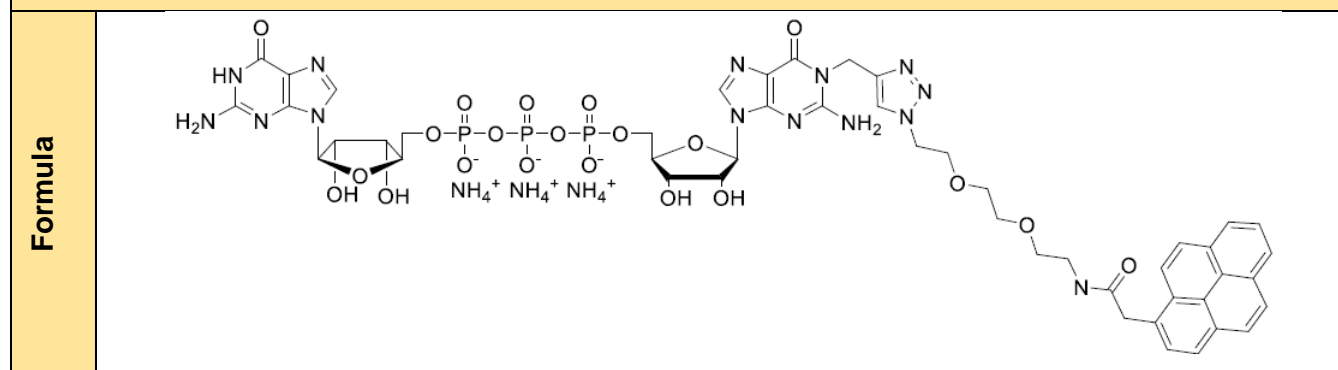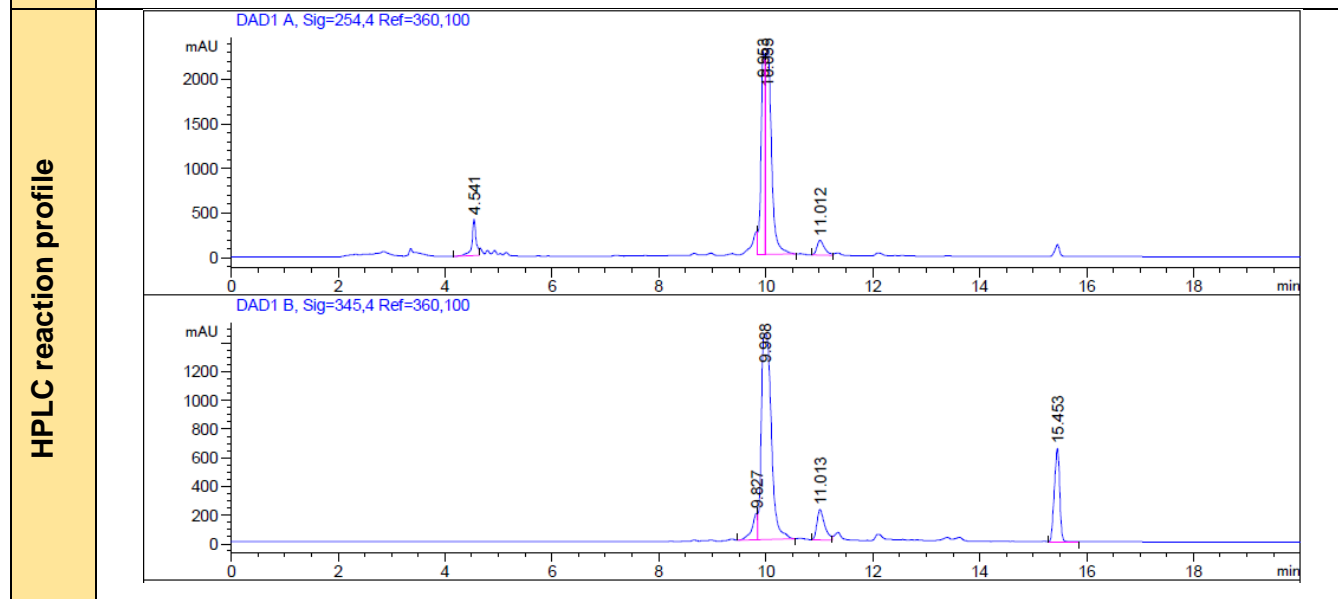



## SUPPORTING INFORMATION

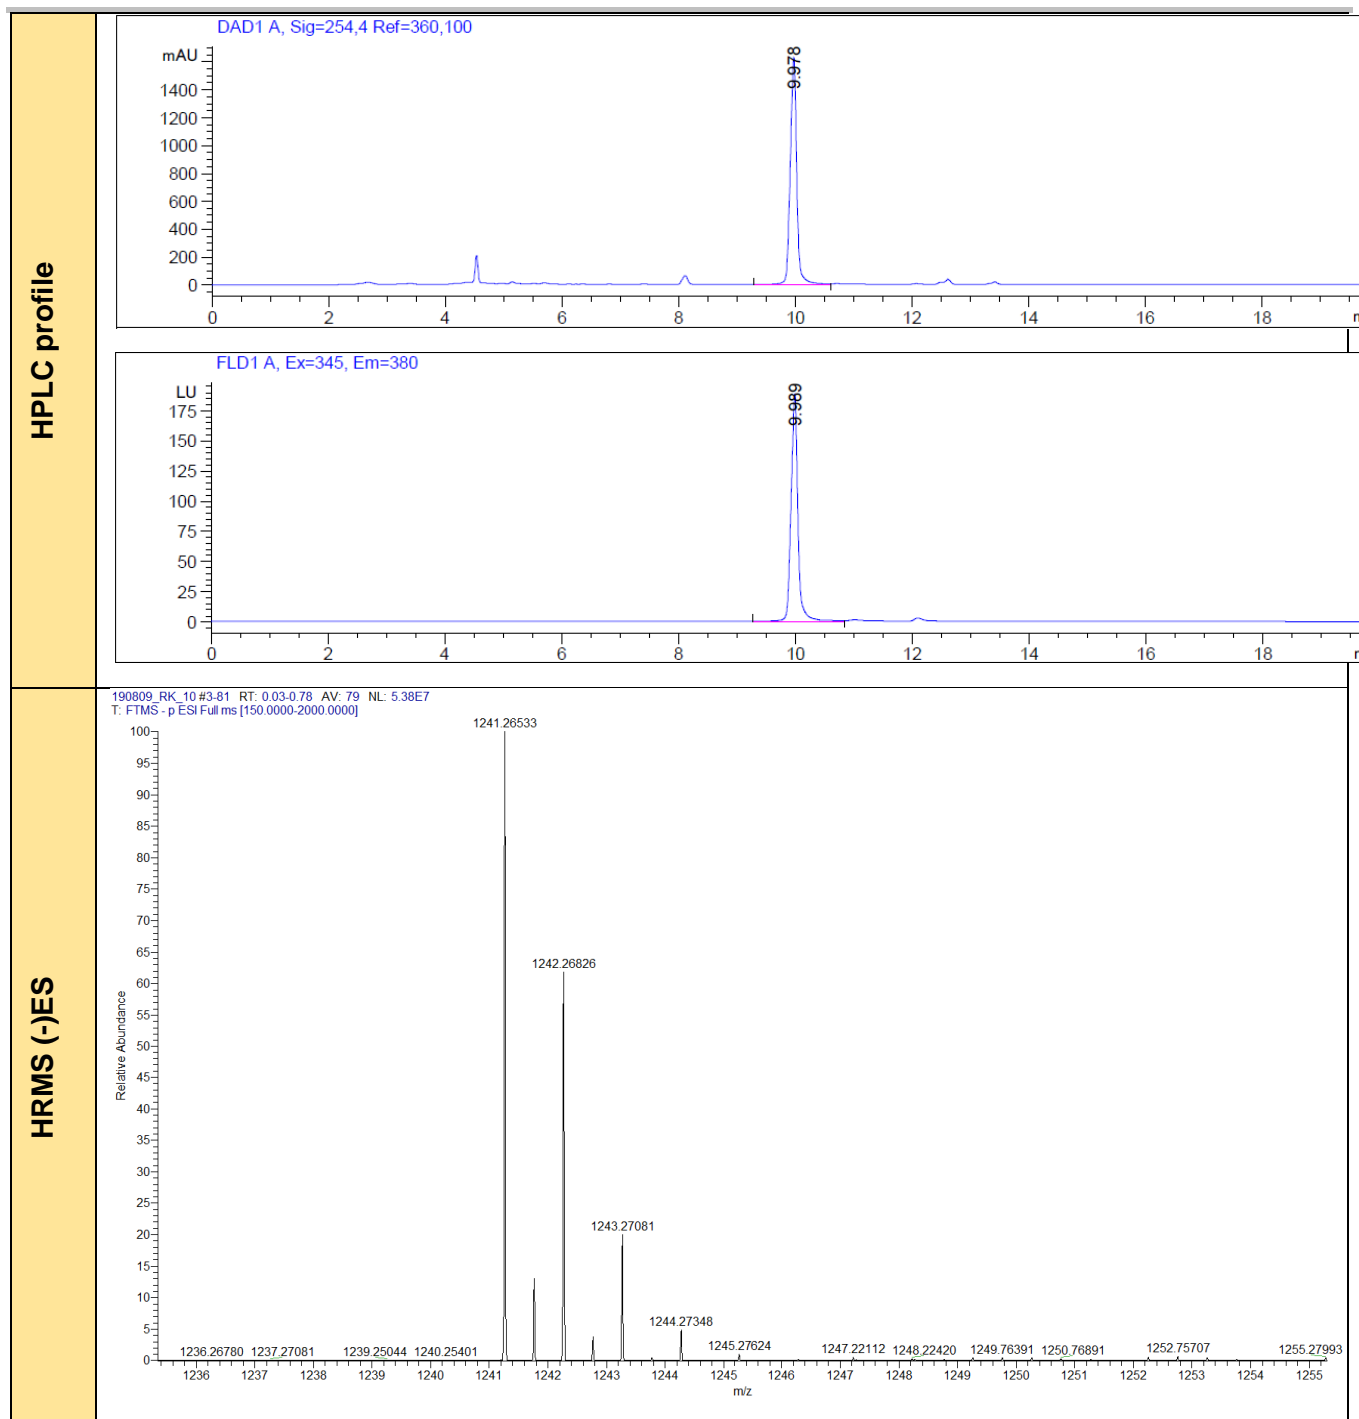

## SUPPORTING INFORMATION

| <b><math>m^7Gp_3A-3'-O-Py</math> (<b>10a</b>)</b> |                                                                                      |
|---------------------------------------------------|--------------------------------------------------------------------------------------|
| <b>Formula</b>                                    | 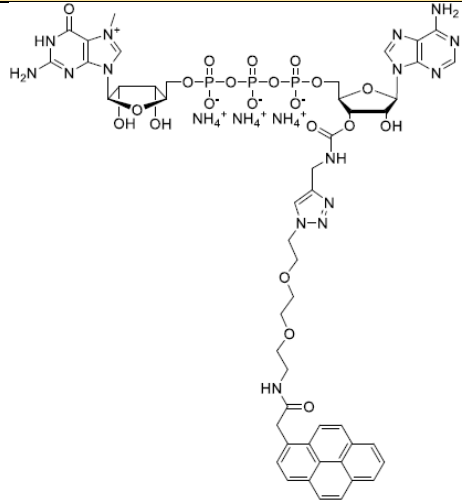   |
| <b>HPLC reaction profile</b>                      |   |
| <b>HPLC profile</b>                               |  |

## SUPPORTING INFORMATION

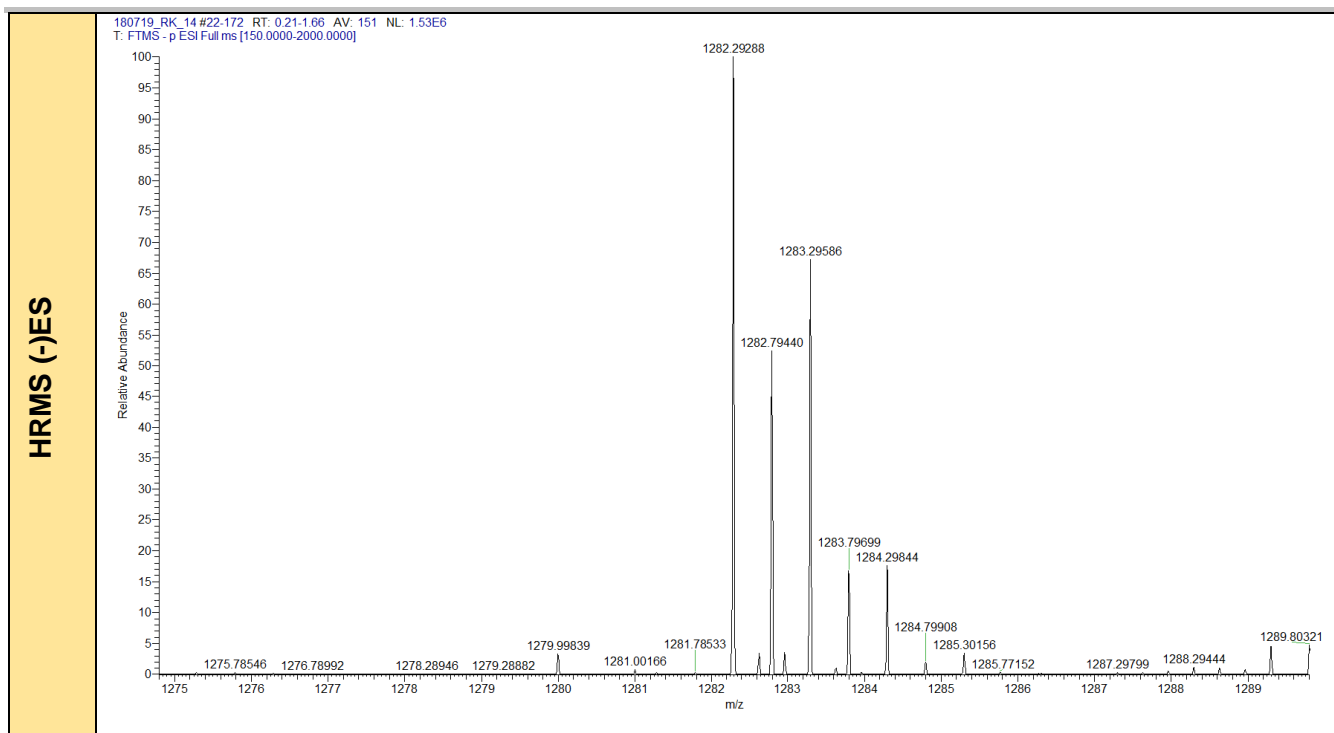**m<sup>7</sup>Gp<sub>3</sub>A-3'-O-Py3 (10b)**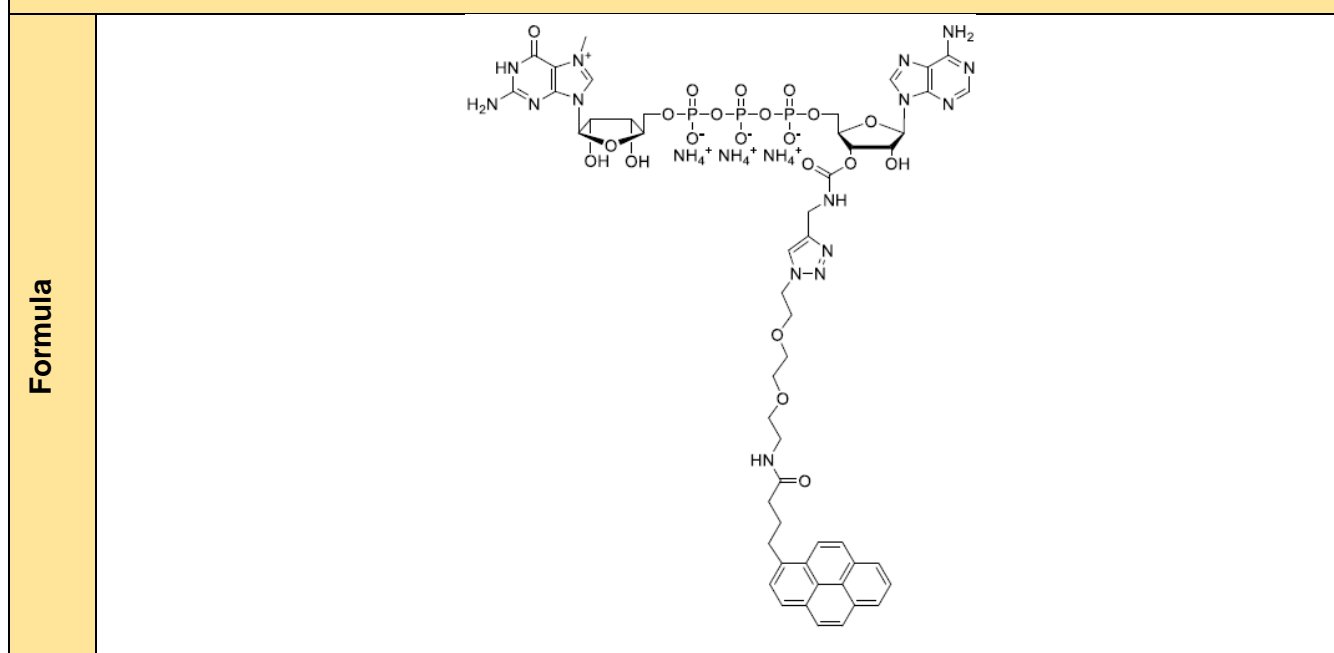

## SUPPORTING INFORMATION

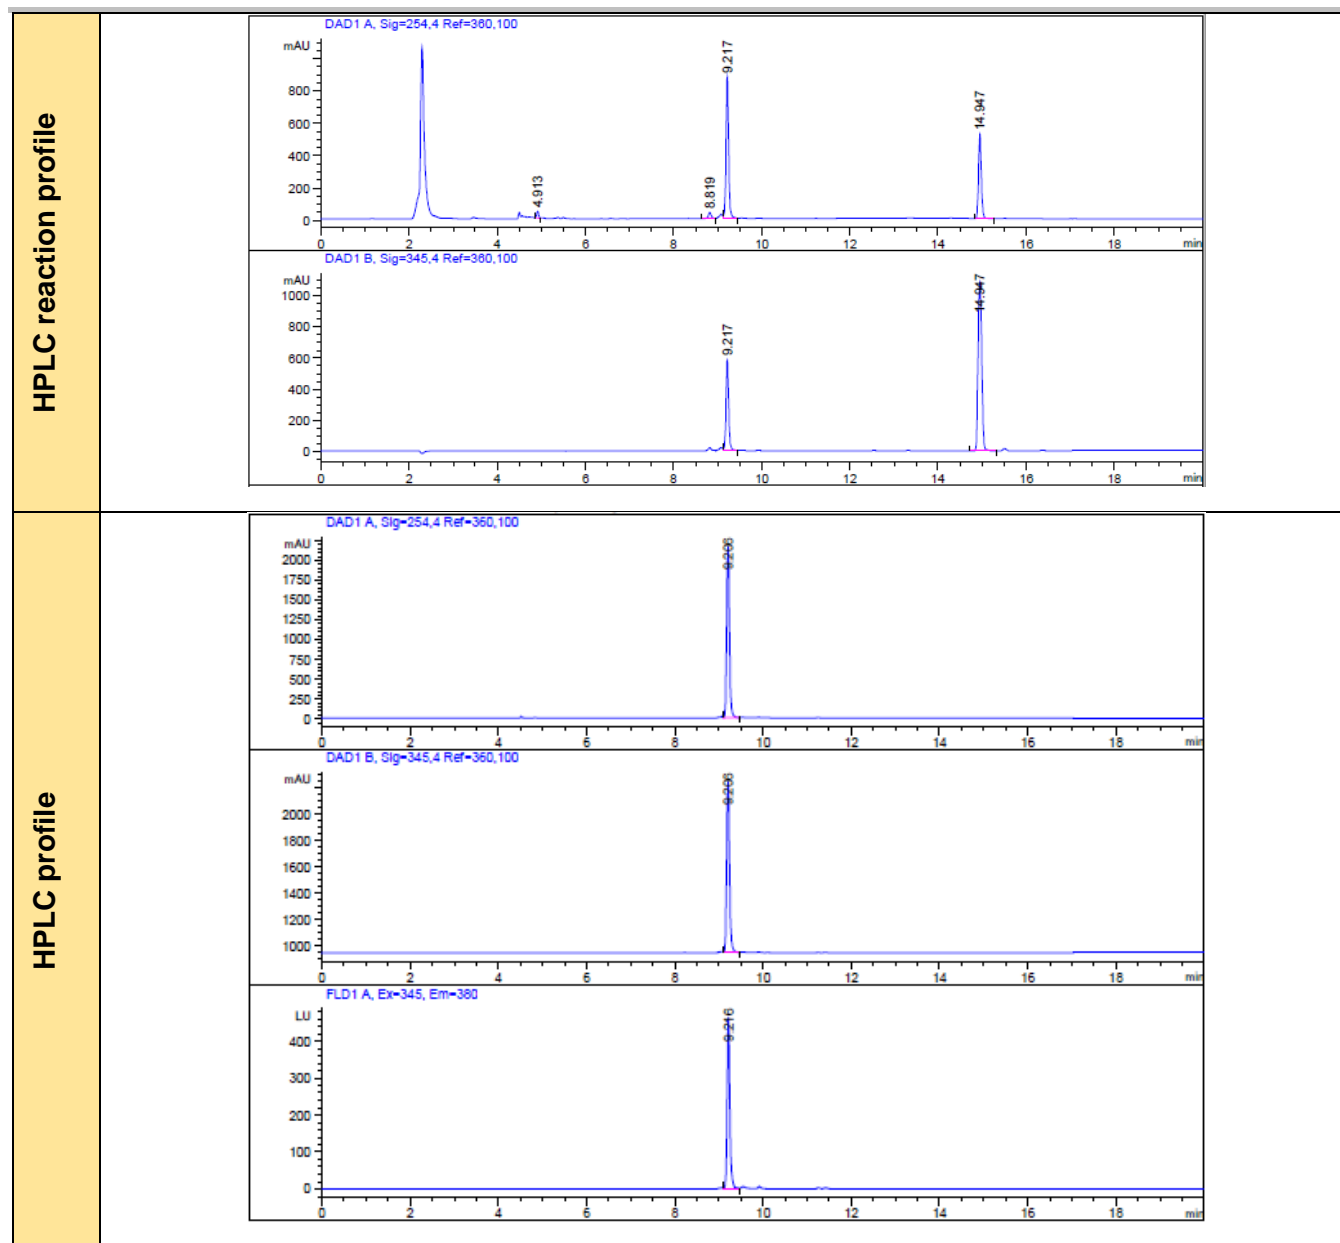

## SUPPORTING INFORMATION

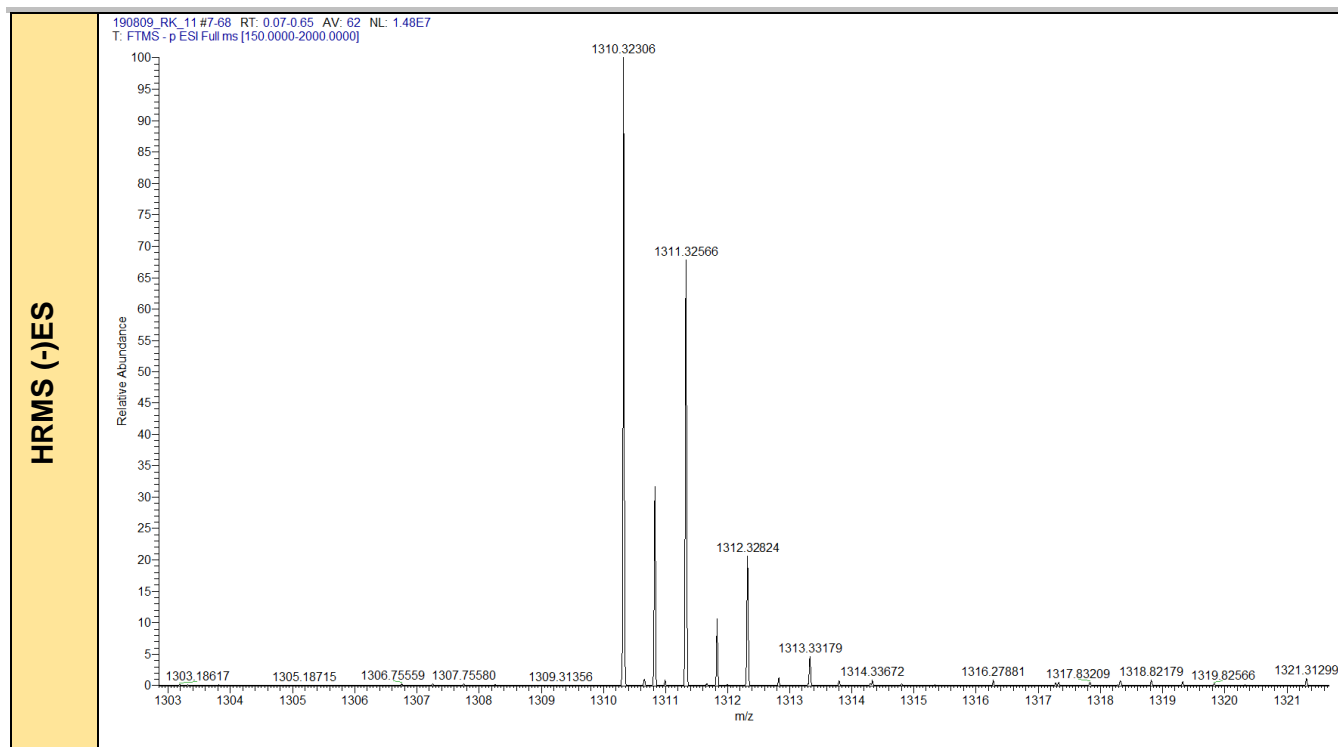**P<sup>1</sup>-5'-(C8-methyl)guanosine-P<sup>3</sup>-3'-adenosine triphosphate ammonium salt (8-Me-Gp<sub>3</sub>A)****Formula**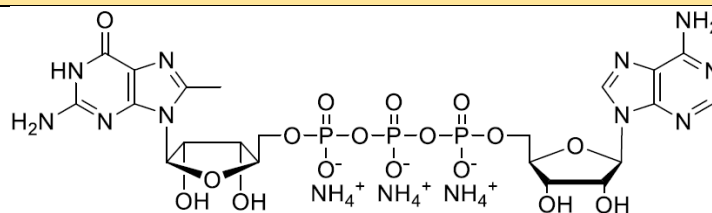**HPLC reaction profile**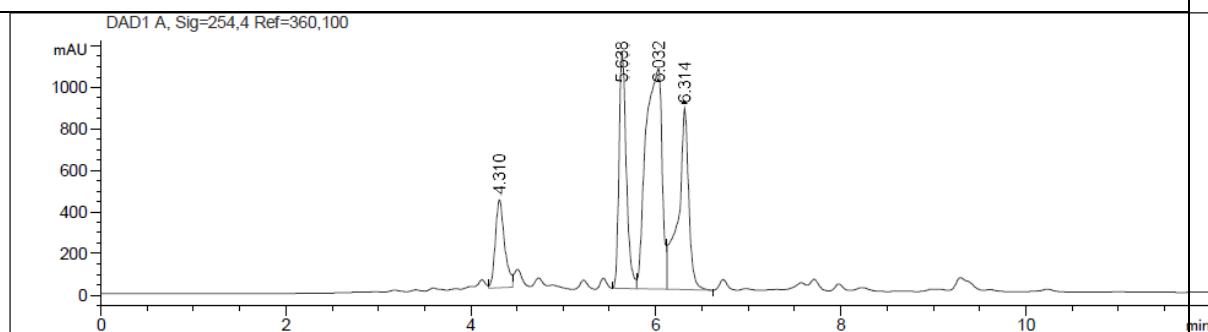

## SUPPORTING INFORMATION

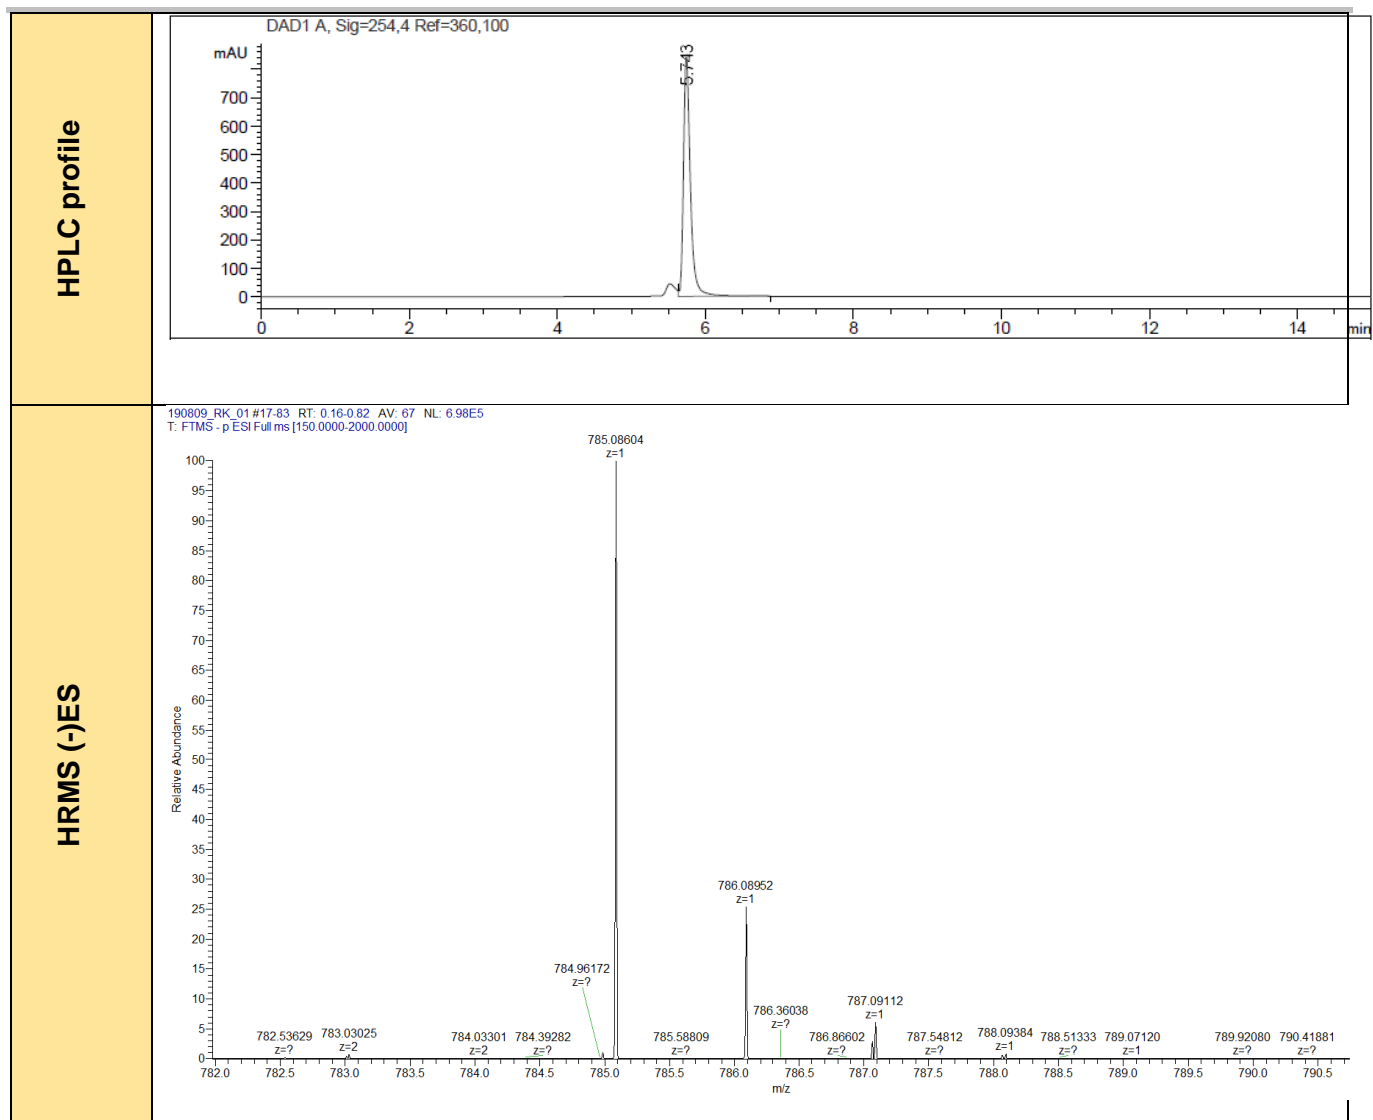

## SUPPORTING INFORMATION

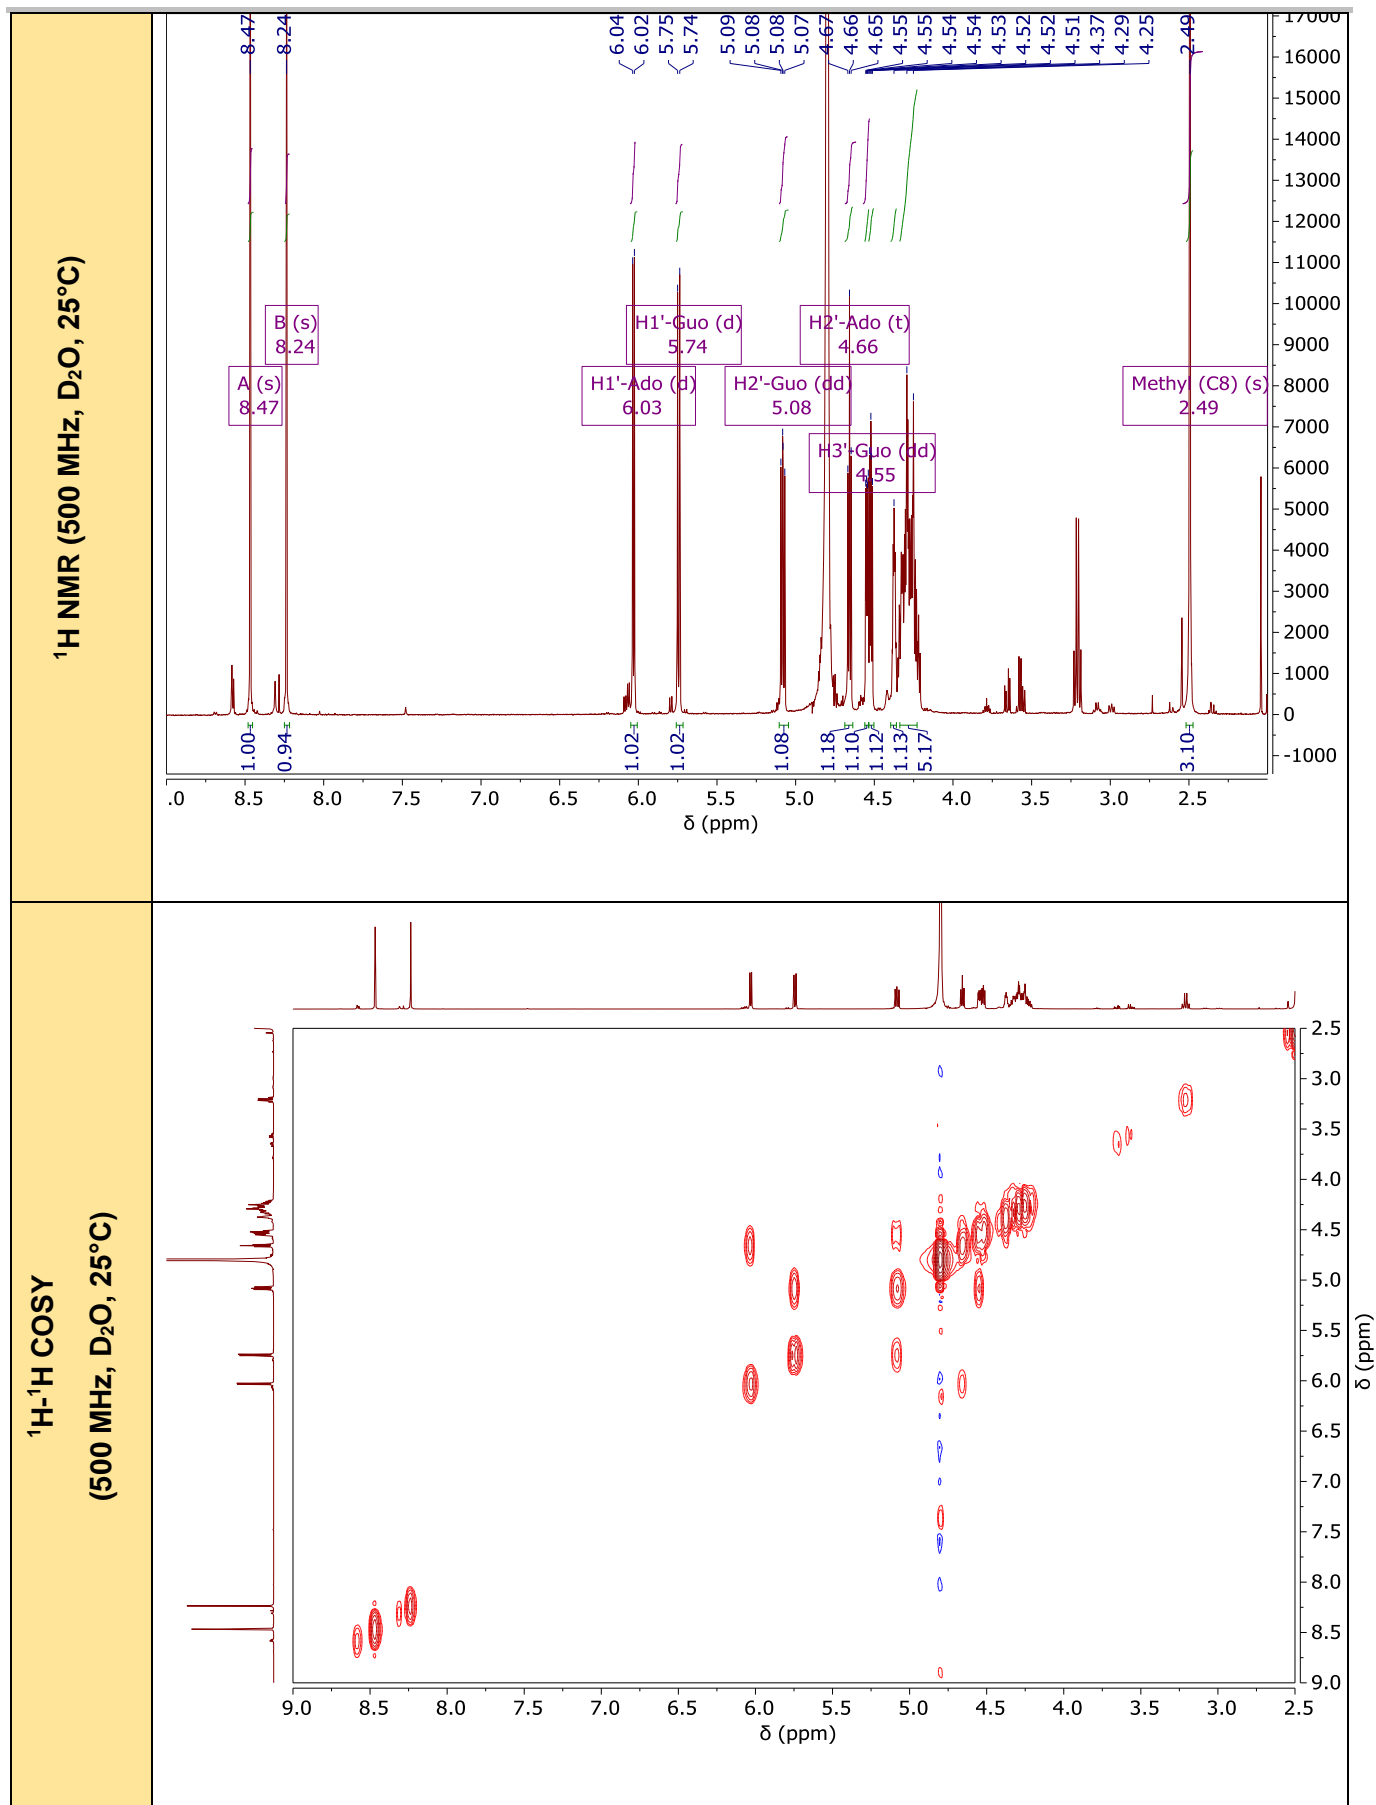

## SUPPORTING INFORMATION

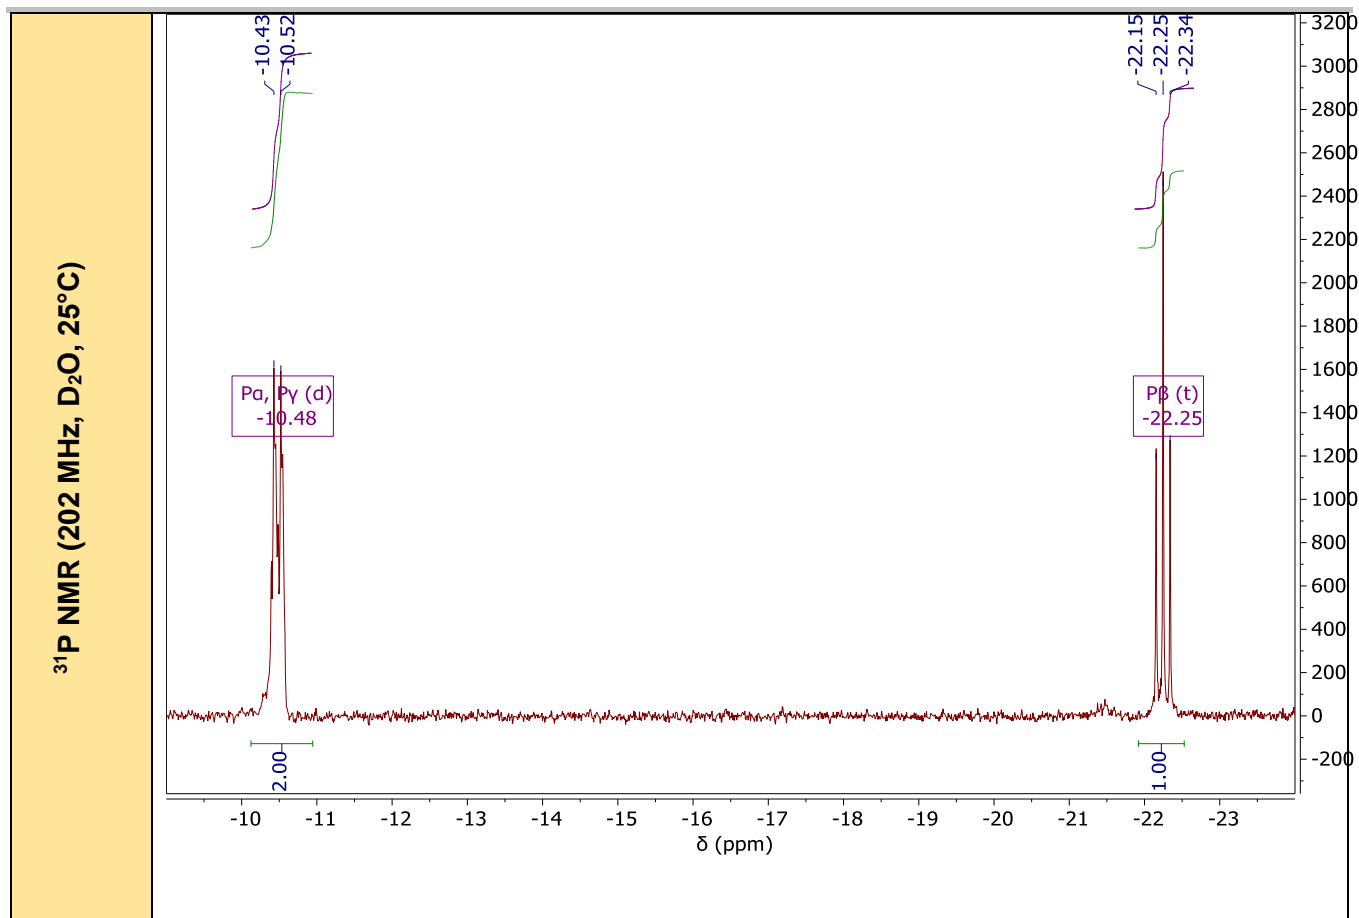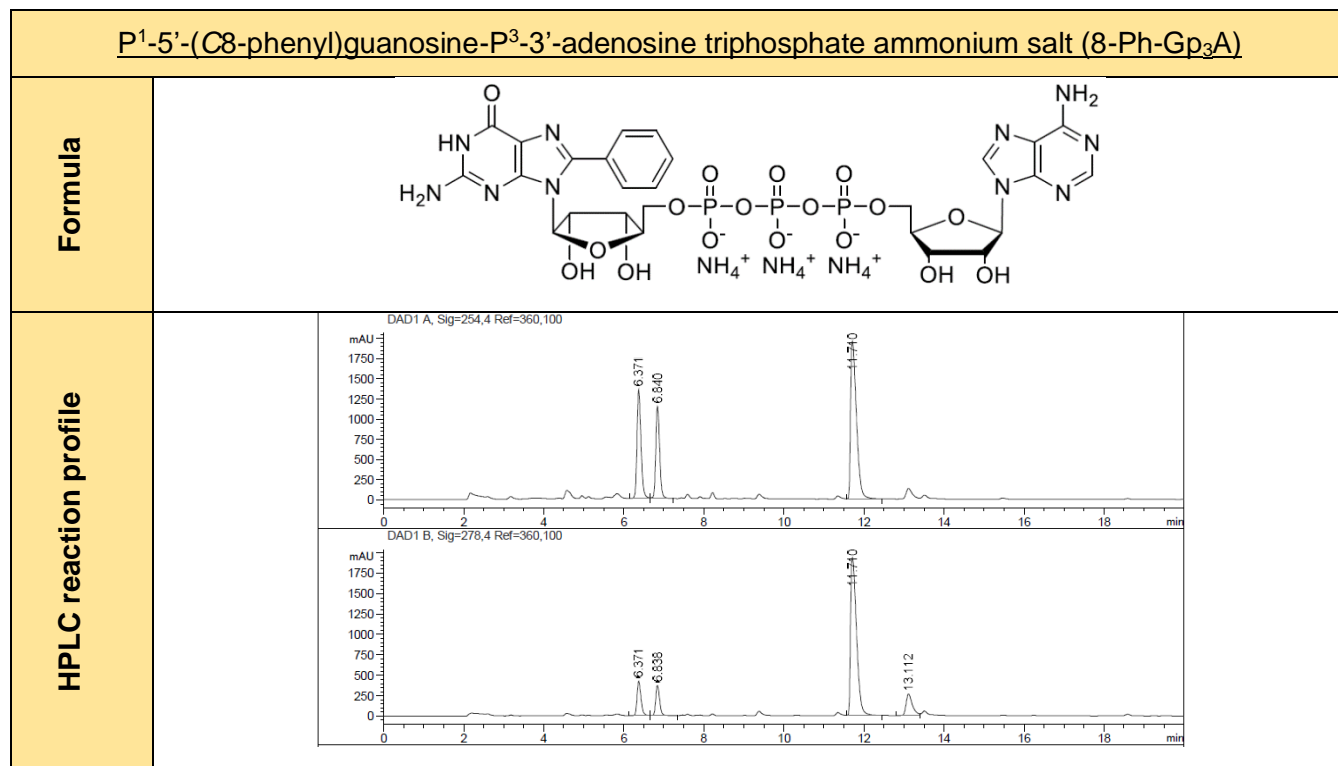



SUPPORTING INFORMATION

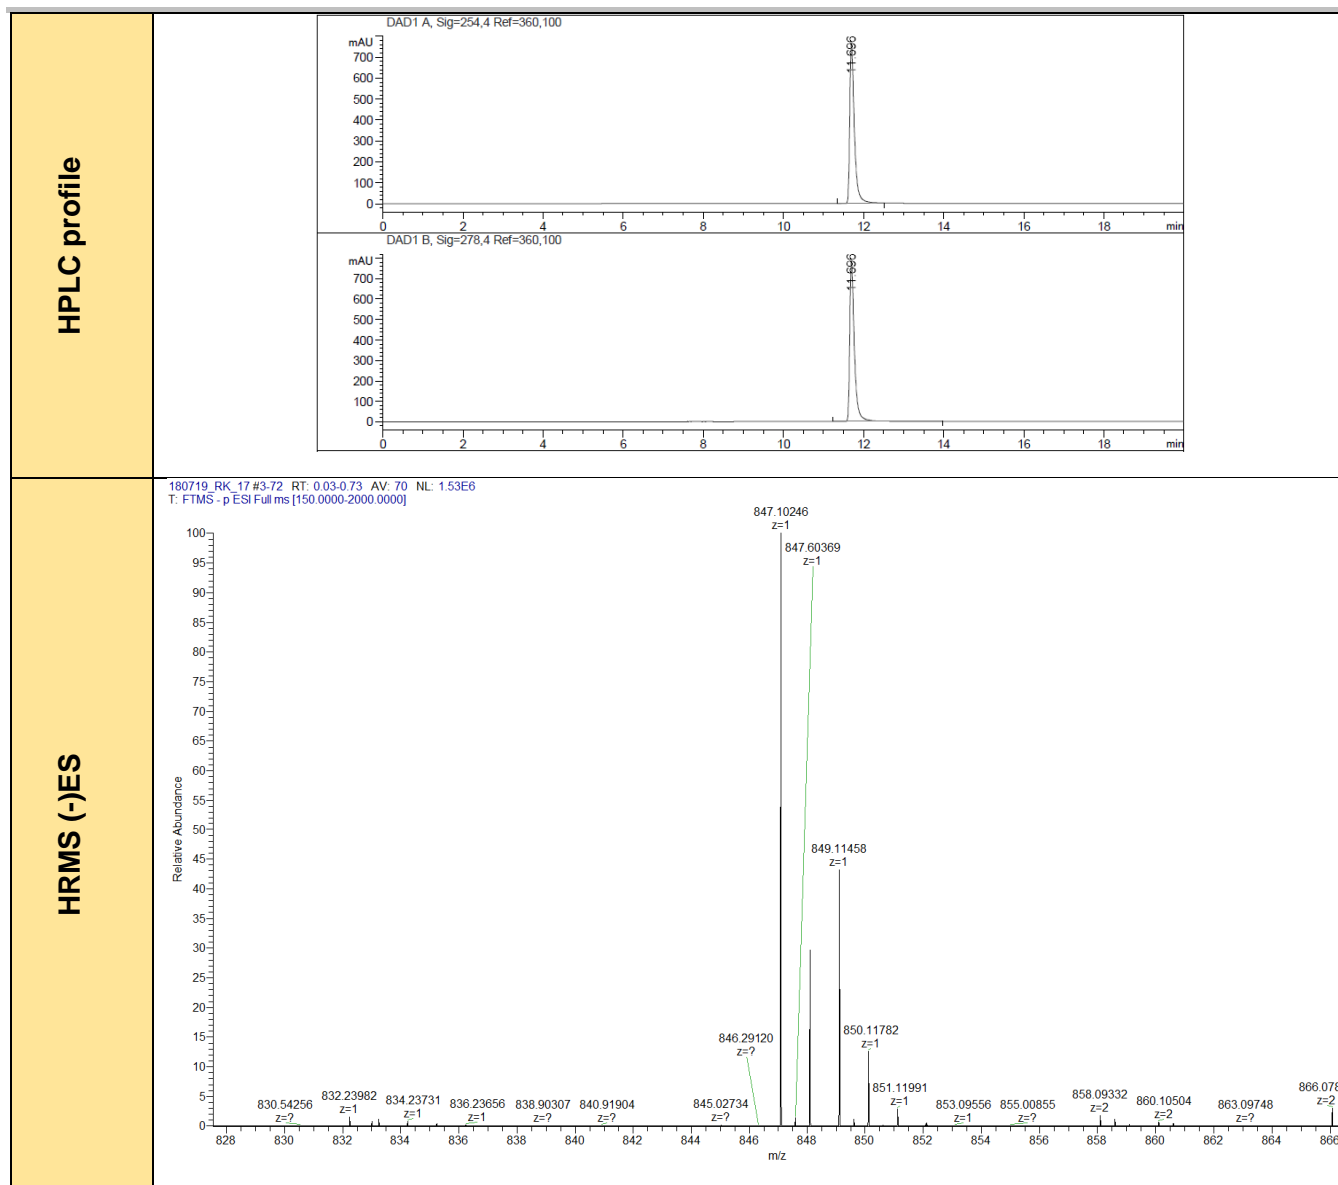

## SUPPORTING INFORMATION

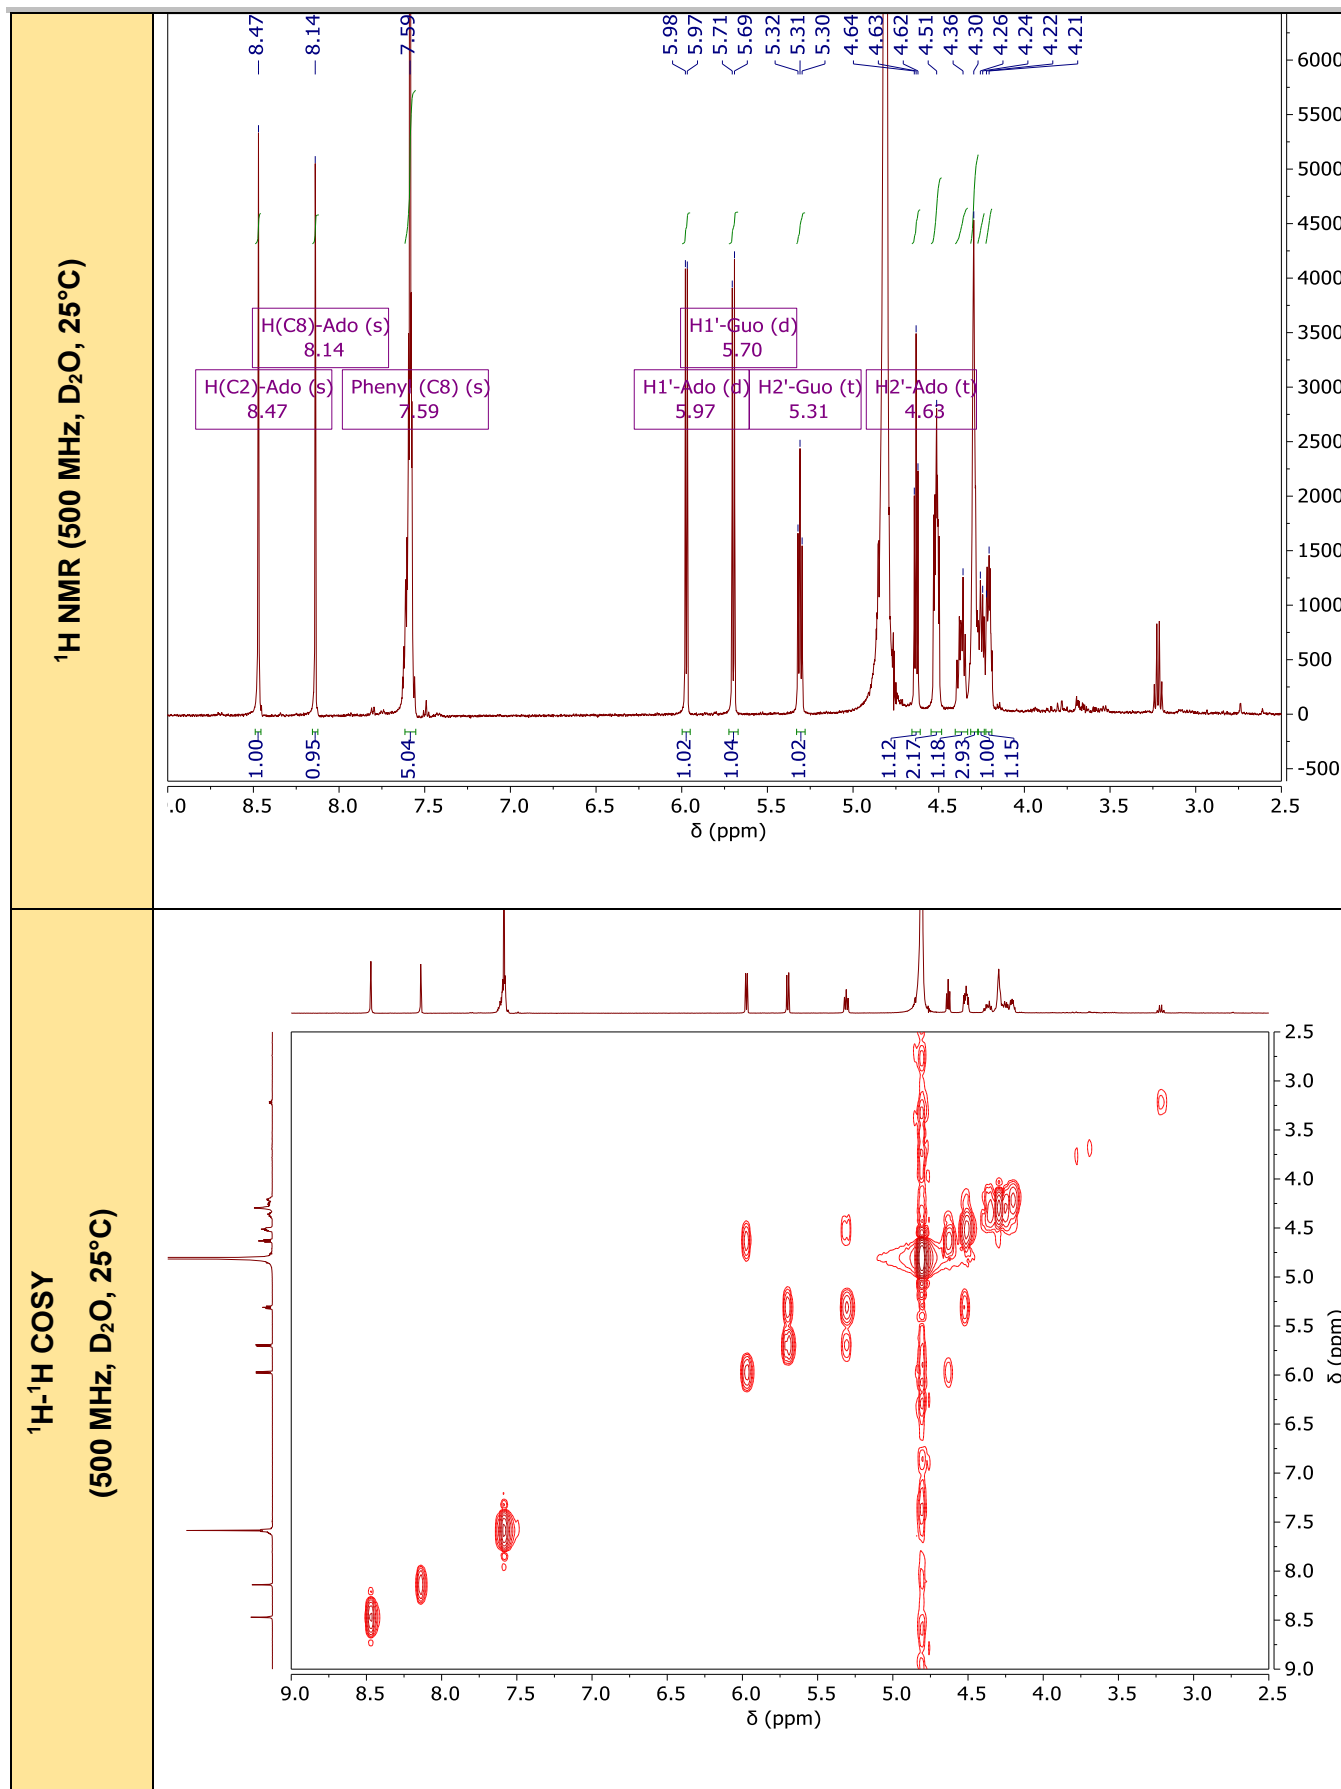

## SUPPORTING INFORMATION

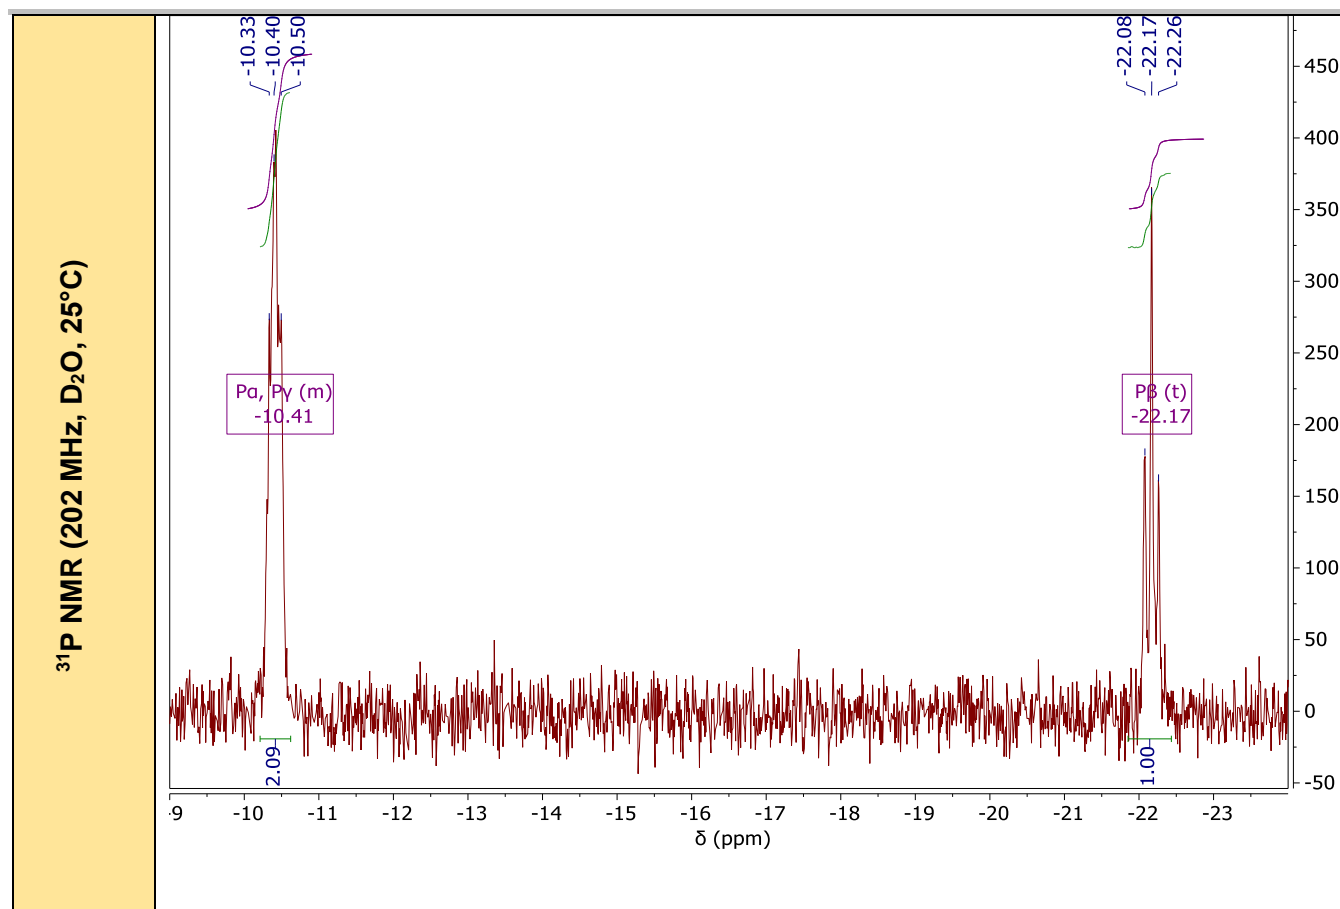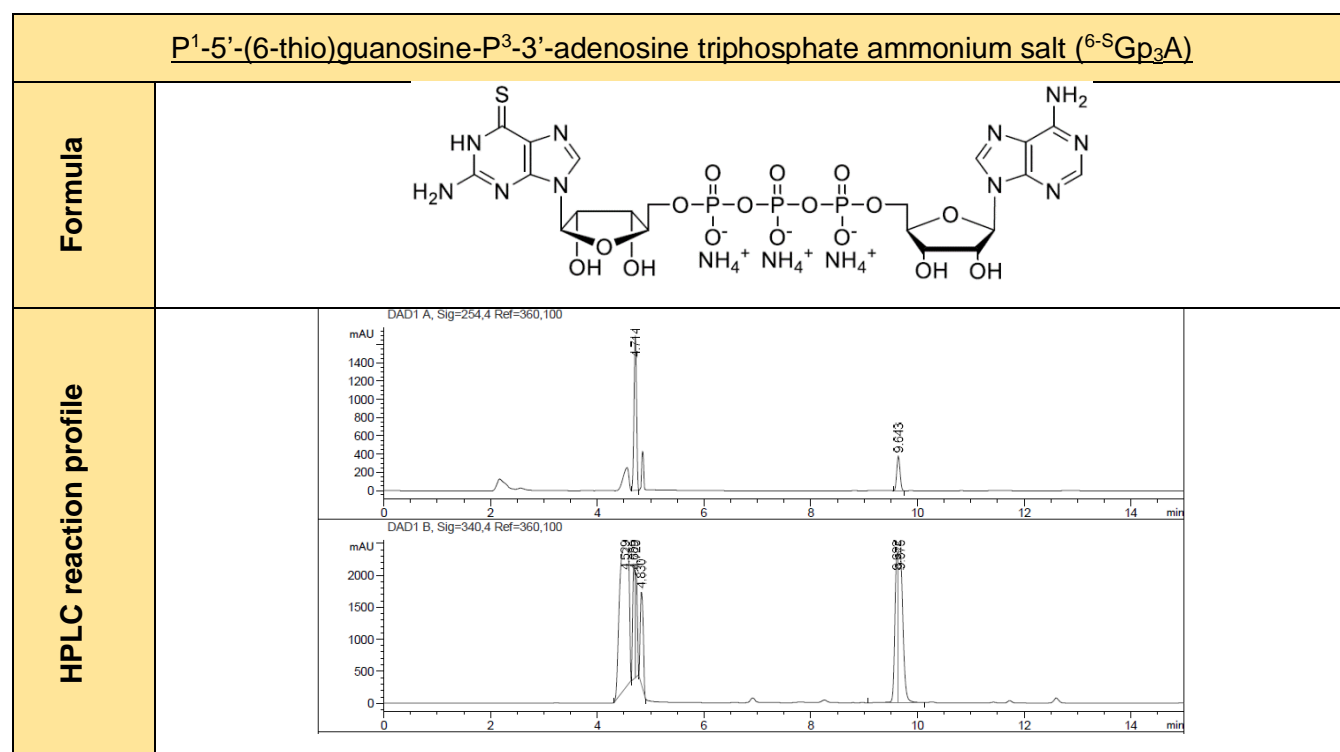

SUPPORTING INFORMATION

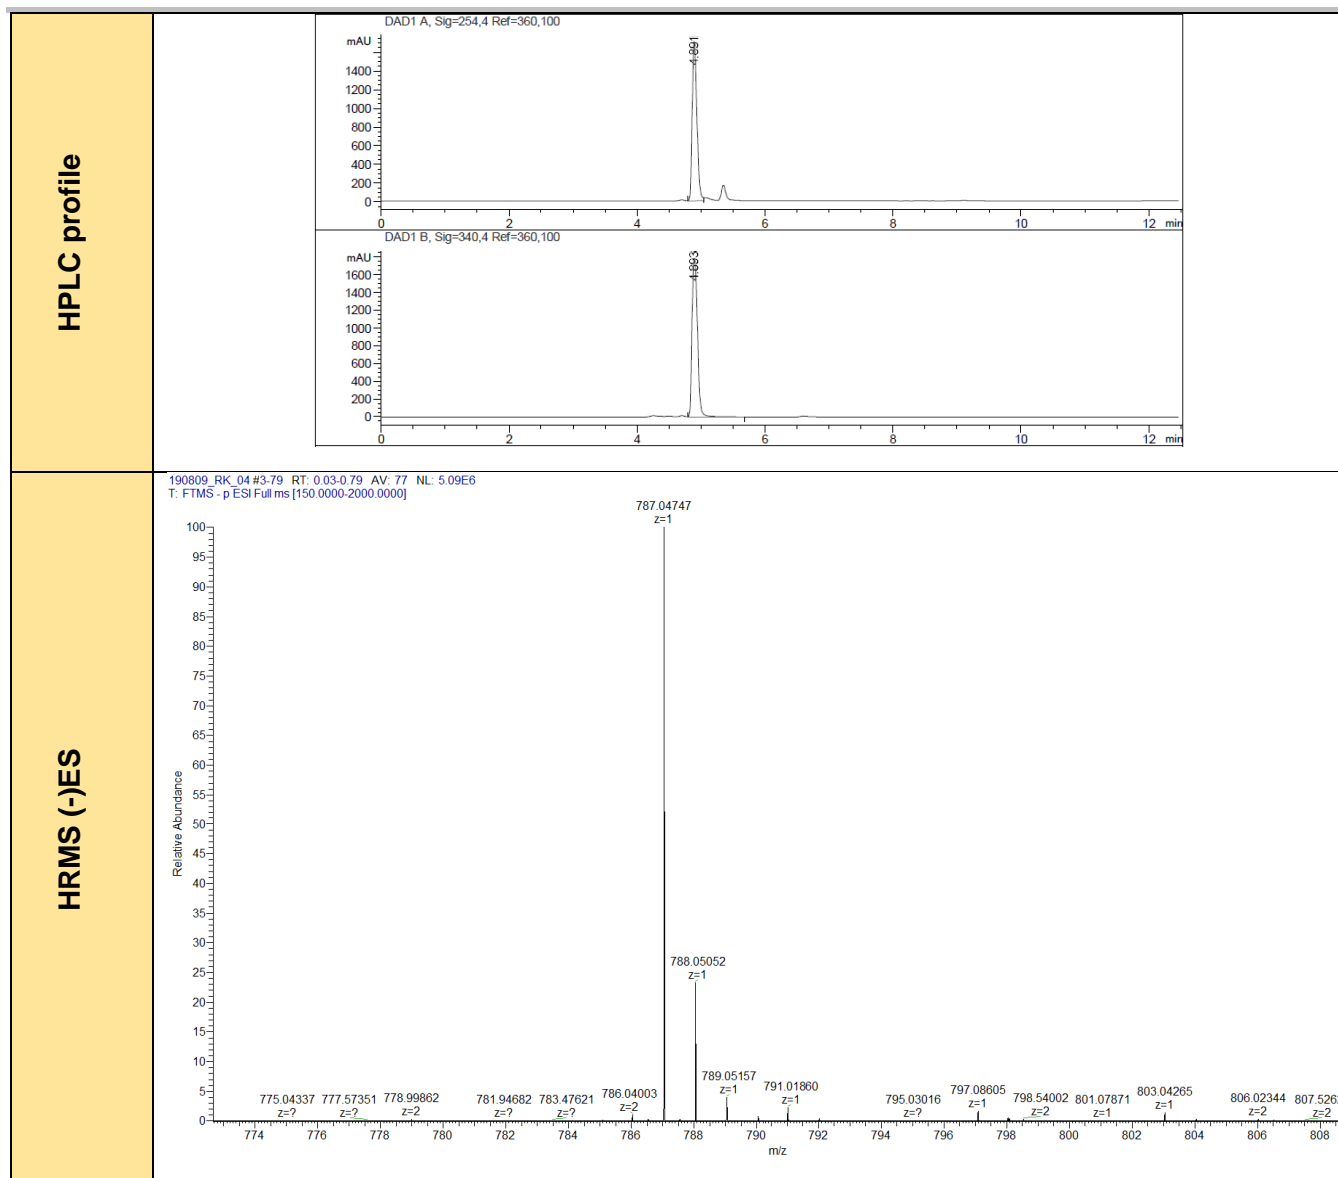

## SUPPORTING INFORMATION

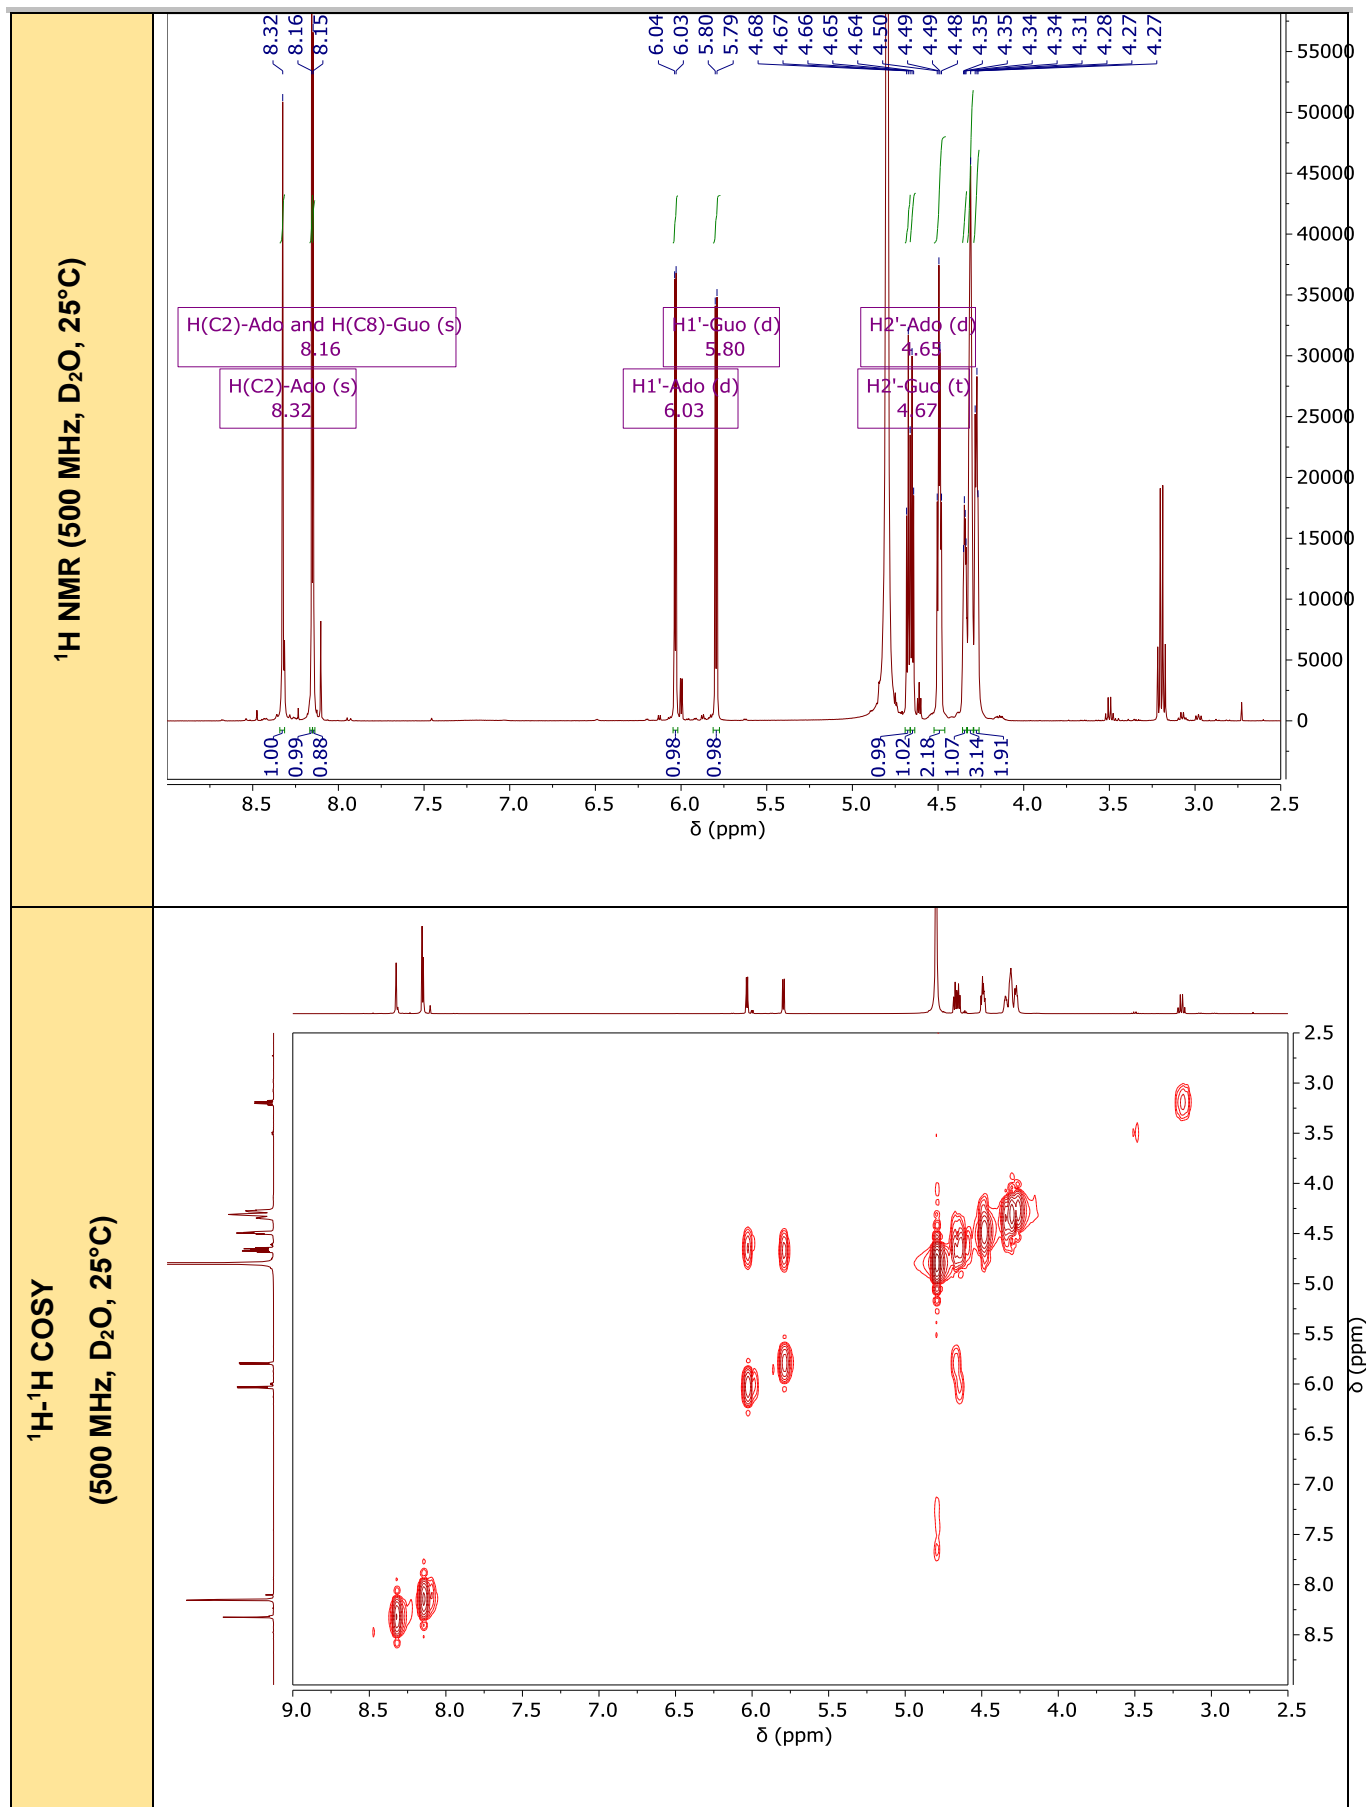

## SUPPORTING INFORMATION

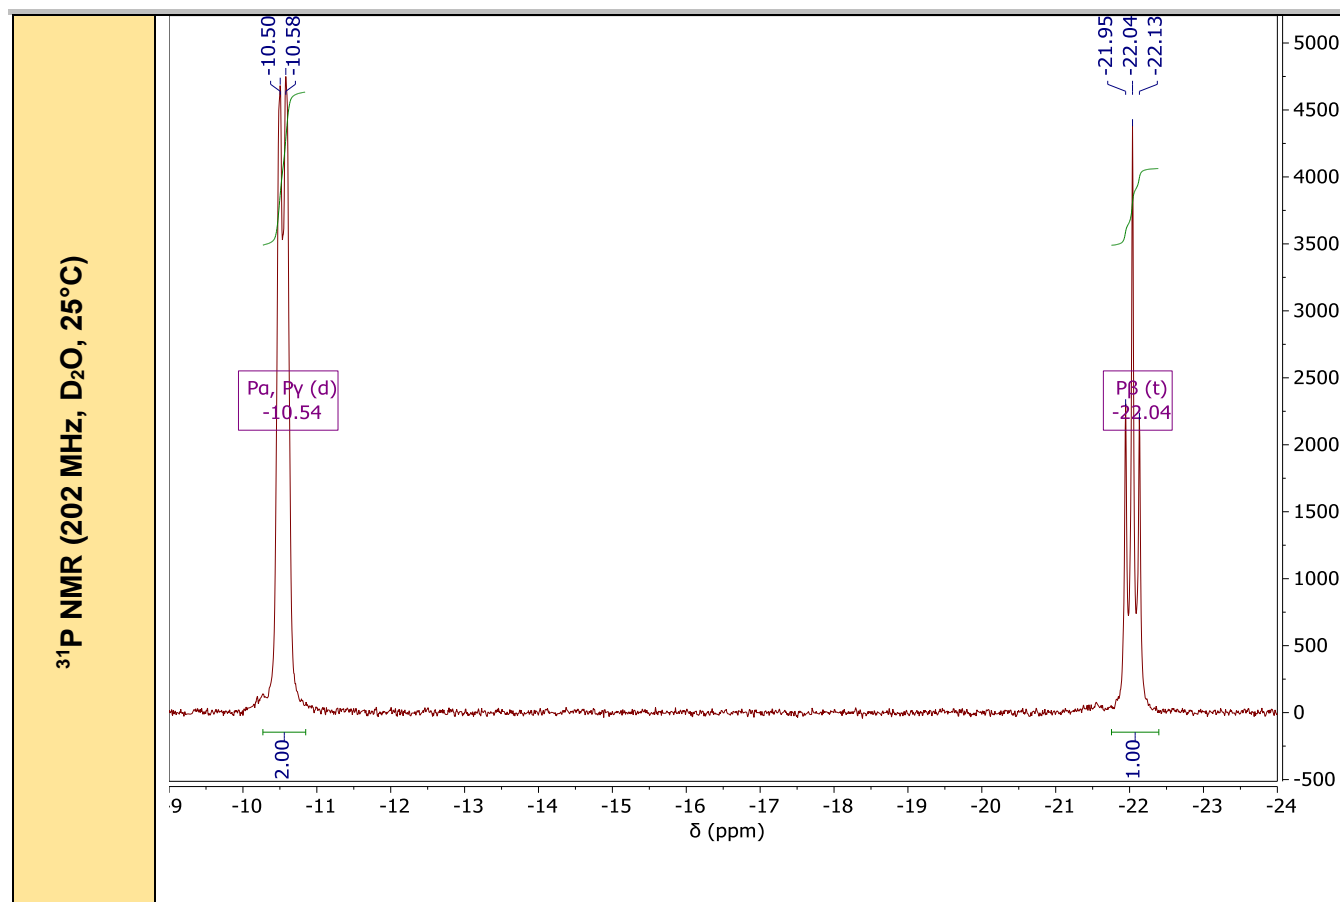

## SUPPORTING INFORMATION

| P <sup>1</sup> -5'-(6-thio)guanosine diphosphate ammonium salt (6 <sup>S</sup> GDP) |                                                                                                                                                               |
|-------------------------------------------------------------------------------------|---------------------------------------------------------------------------------------------------------------------------------------------------------------|
| Formula                                                                             | 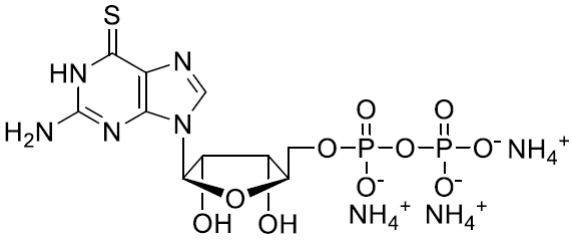                                                                            |
| HPLC reaction profile                                                               |  <p>DAD1 A, Sig=254,4 Ref=360,100</p> <p>DAD1 B, Sig=340,4 Ref=360,100</p> |
| HPLC profile                                                                        |  <p>DAD1 B, Sig=340,4 Ref=360,100</p>                                     |

## SUPPORTING INFORMATION

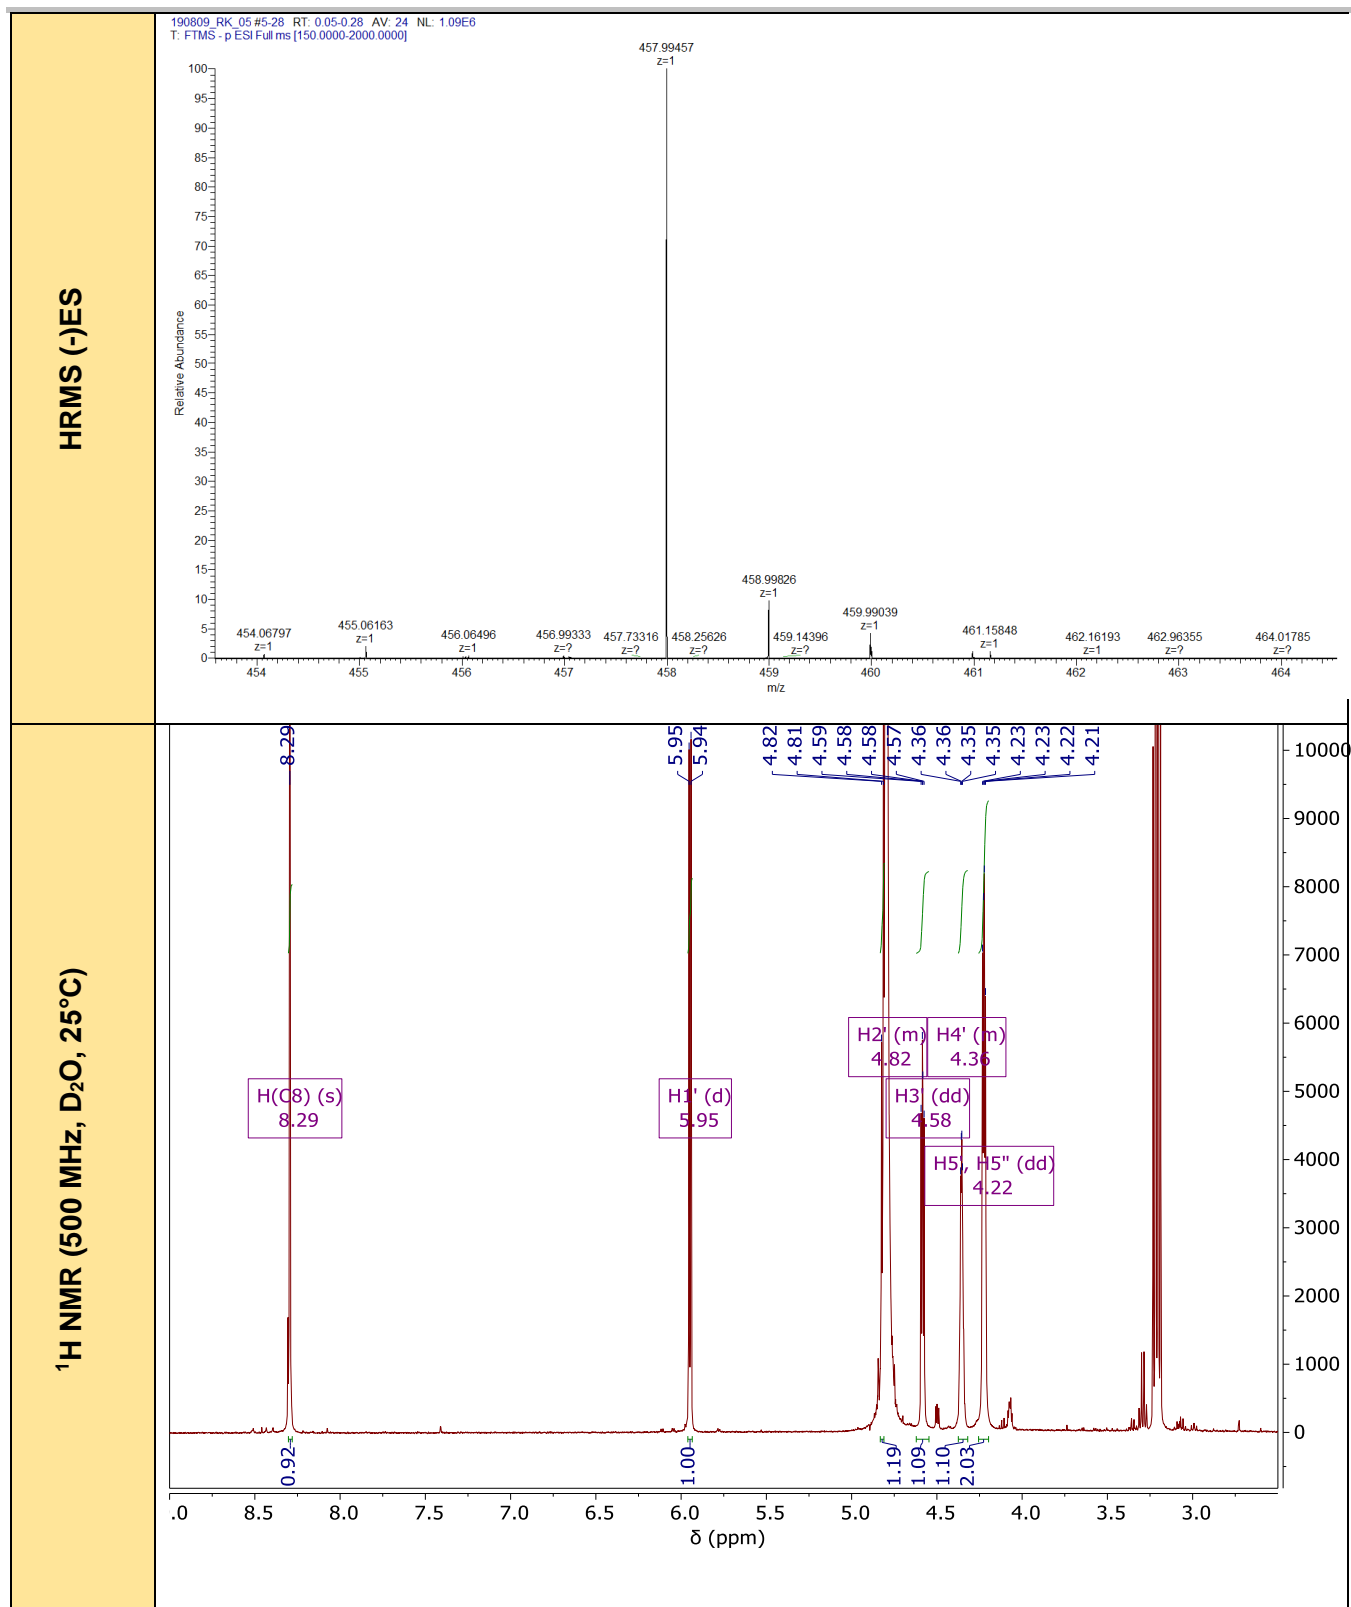



## SUPPORTING INFORMATION

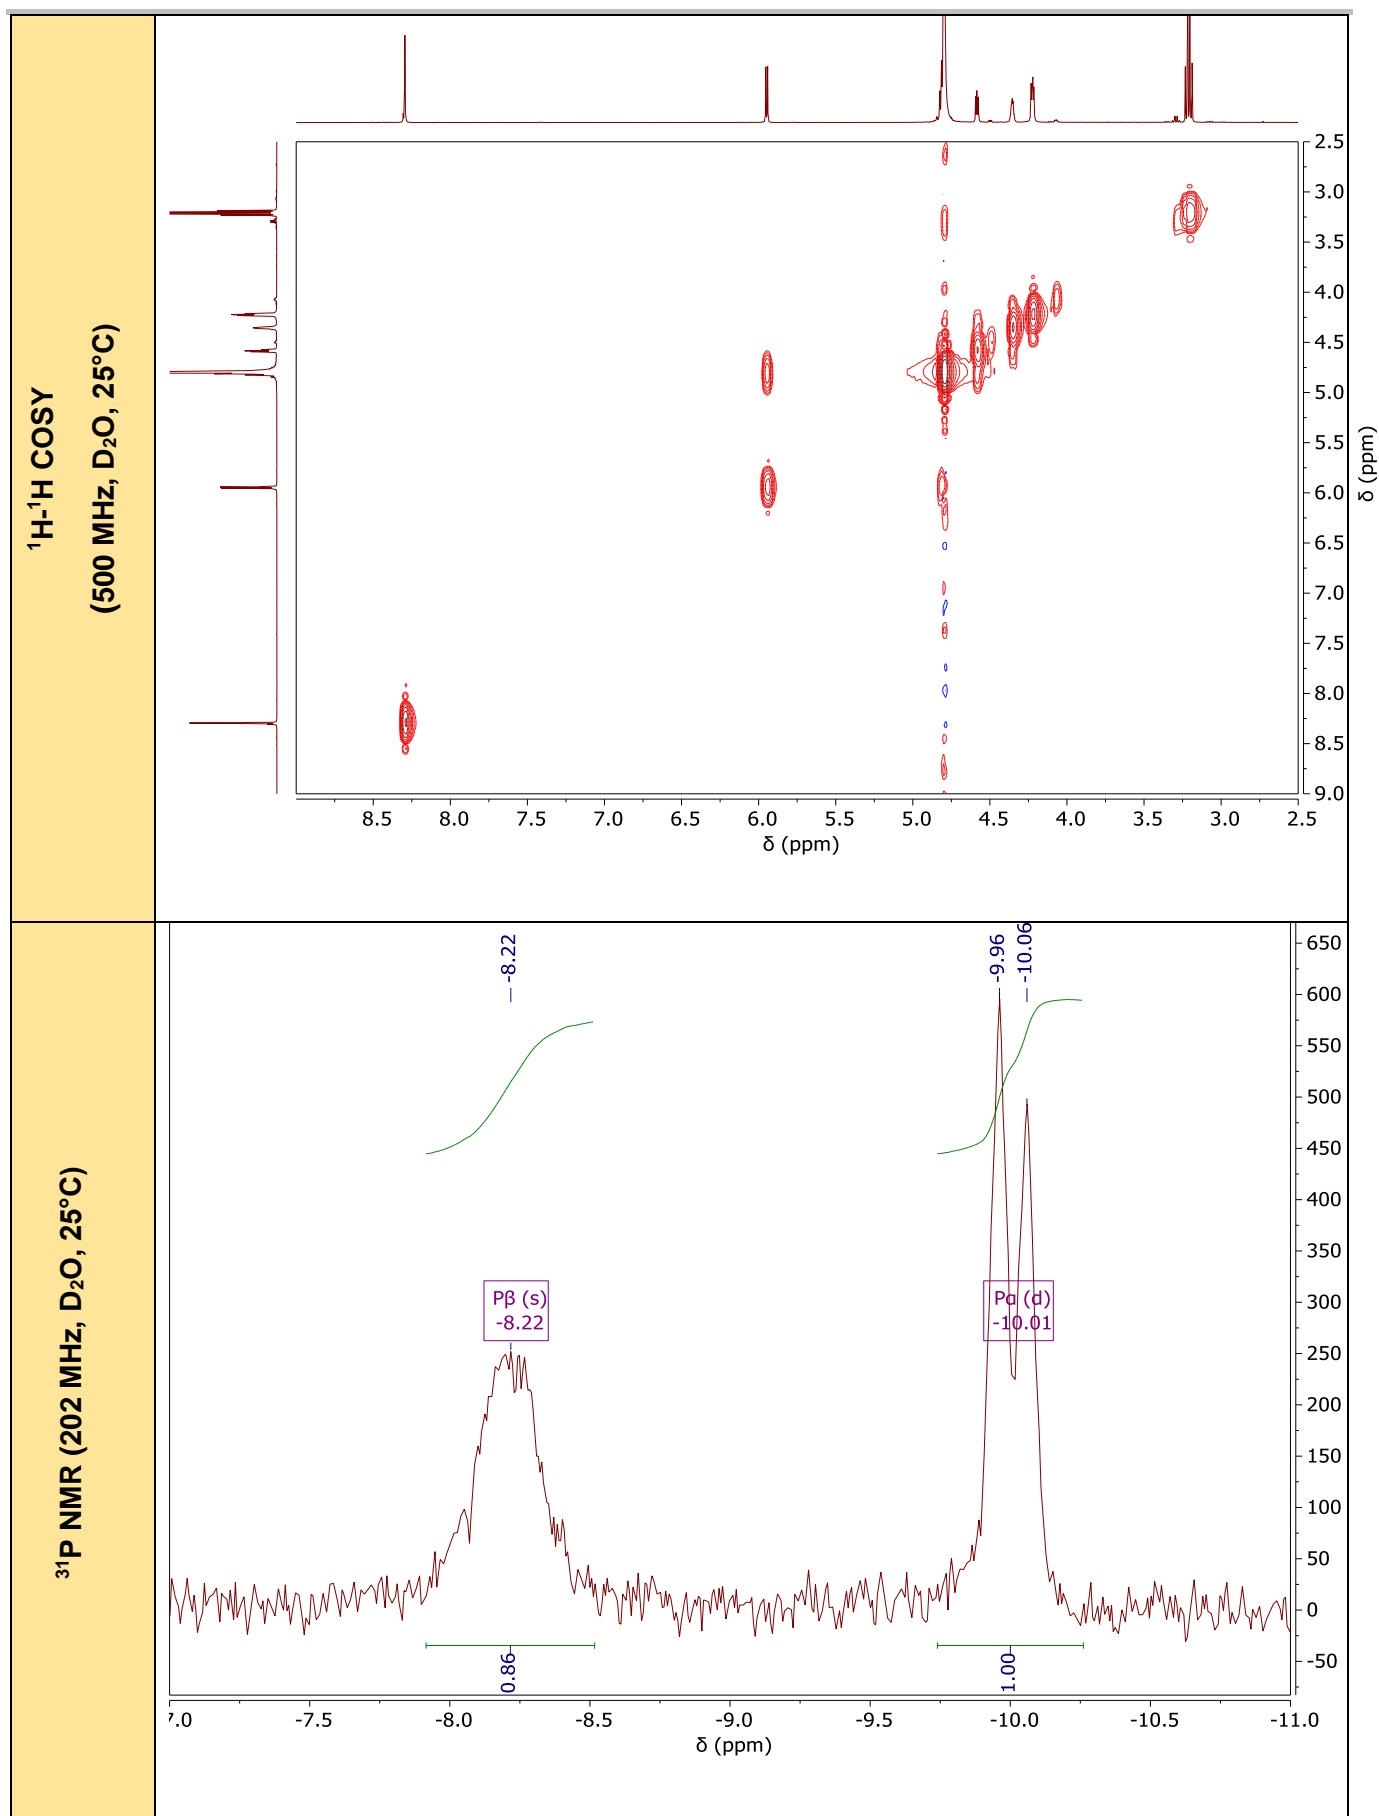

Supplement: CHEM-26-11266-s001.pdf [file CHEM-26-11266-s001.pdf]
